# Supplementary material for: Neuroanatomical dimensions in major depression: external validation and links with cognition, adverse life events, self-harm, metabolomics and genetics
Source: Research Square preprint supplement (doi:10.21203/rs.3.rs-5975731/v1), 2025-03-26
Supplement: Supplementary file 1 [file 4b4d189ff327da3c161294e7.xlsx]

## Sheet: 14.GP_Volumetric measures_MUSE
Supplementary Table x. Brain Region Volumetric Measures from MUSE features in Dimension 1, Dimension 2, Combined D1 and D2, and Neither D1 or D2 in UKB General Population (N =3 7,235)
Region	F-value	p_value	eta_squared	Dimension1	Dimension2	Combined D1 D2	Neither D1 D2
TOTALBRAIN	2746.412	0.000	0.215	1327272.239	1177342.079	1275105.778	1244915.657
ICV	2406.902	0.000	0.193	1535125.661	1371167.206	1478674.339	1444796.913
GM	3299.085	0.000	0.247	719841.593	635899.474	680830.274	679529.976
WM	2083.210	0.000	0.172	554381.751	490706.408	539413.392	515234.458
GM_L	3240.628	0.000	0.244	352318.170	311413.406	333105.718	332880.040
WM_L	2104.711	0.000	0.173	269631.355	238523.891	262766.795	250235.054
GM_R	3342.887	0.000	0.250	357390.730	315033.930	338037.486	336732.796
WM_R	2066.269	0.000	0.171	271710.267	240444.958	264073.845	252651.774
CORPUS_CALLOSUM	796.169	0.000	0.073	13040.129	11737.559	12572.752	12347.631
CEREBELLUM	1011.675	0.000	0.092	149081.825	138035.306	142021.136	145139.541
DEEP_WM_GM	1684.368	0.000	0.144	59737.624	54591.910	58516.911	56696.286
FRONTAL	2720.619	0.000	0.213	414955.413	363911.731	398325.533	386017.600
LIMBIC	2501.319	0.000	0.199	40728.619	35699.393	38504.886	38321.271
OCCIPITAL	2038.580	0.000	0.169	137651.689	121595.677	132342.491	128629.721
PARIETAL	3480.560	0.000	0.257	210020.095	182333.774	199872.121	195096.370
TEMPORAL	2847.617	0.000	0.221	238671.228	209207.616	228069.082	222611.072
VENTRICLE	35.349	0.000	0.004	30172.831	29941.230	32613.887	28513.325
CEREBELLUM_L	974.968	0.000	0.088	68889.484	63818.372	65617.968	67103.988
DEEP_WM_GM_L	1605.043	0.000	0.138	29555.056	27049.345	28964.093	28074.551
FRONTAL_L	2701.653	0.000	0.212	205516.811	180326.479	197410.550	191132.485
LIMBIC_L	2127.440	0.000	0.175	20809.263	18277.000	19666.748	19611.517
OCCIPITAL_L	2235.757	0.000	0.182	68833.808	60351.736	66362.705	63746.444
PARIETAL_L	3103.696	0.000	0.236	105424.797	91940.317	100217.470	98491.541
TEMPORAL_L	2662.871	0.000	0.210	117678.788	103357.519	112548.895	109933.391
VENTRICLE_L	52.348	0.000	0.005	14469.386	14165.573	15926.758	13350.244
CEREBELLUM_R	991.706	0.000	0.090	70059.648	64764.797	66716.098	68118.413
DEEP_WM_GM_R	1724.155	0.000	0.147	30182.568	27542.566	29552.818	28621.735
FRONTAL_R	2698.553	0.000	0.212	209438.602	183585.252	200914.982	194885.114
LIMBIC_R	2291.663	0.000	0.186	19919.356	17422.393	18838.138	18709.754
OCCIPITAL_R	1634.589	0.000	0.140	68817.881	61243.941	65979.786	64883.277
PARIETAL_R	3701.814	0.000	0.269	104595.298	90393.457	99654.651	96604.829
TEMPORAL_R	2903.341	0.000	0.224	120992.440	105850.097	115520.187	112677.681
VENTRICLE_R	20.720	0.000	0.002	12899.980	12968.972	13837.212	12400.150
BASAL_GANGLIA	831.255	0.000	0.076	19224.692	17815.357	18949.663	18455.916
DEEP_GM	1519.325	0.000	0.131	15998.069	14604.497	15555.496	15202.919
DEEP_WM	1284.175	0.000	0.113	12834.397	11588.159	12648.017	11992.957
FRONTAL_GM	2754.979	0.000	0.215	205448.834	179624.227	193480.737	192832.369
FRONTAL_WM	2021.687	0.000	0.168	209506.579	184287.504	204844.795	193185.231
LIMBIC_GM	2501.319	0.000	0.199	40728.619	35699.393	38504.886	38321.271
OCCIPITAL_GM	2137.962	0.000	0.176	85509.750	75341.644	81963.737	79820.723
OCCIPITAL_WM	1340.162	0.000	0.118	52141.939	46254.033	50378.754	48808.998
PARIETAL_GM	3615.780	0.000	0.265	104713.853	90427.642	98224.257	97720.253
PARIETAL_WM	2288.862	0.000	0.186	105306.241	91906.132	101647.864	97376.117
TEMPORAL_GM	3502.726	0.000	0.259	118349.302	102095.297	110432.715	110684.873
TEMPORAL_WM	1685.255	0.000	0.144	120321.926	107112.318	117636.368	111926.199
BASAL_GANGLIA_L	760.496	0.000	0.070	9553.015	8876.468	9424.133	9187.994
DEEP_GM_L	1499.191	0.000	0.130	8104.703	7391.436	7859.665	7701.634
DEEP_WM_L	1205.362	0.000	0.107	6213.607	5625.268	6137.832	5808.900
FRONTAL_GM_L	2736.363	0.000	0.214	102366.093	89518.508	96388.469	96056.679
FRONTAL_WM_L	1988.816	0.000	0.165	103150.719	90807.971	101022.081	95075.806
LIMBIC_GM_L	2127.440	0.000	0.175	20809.263	18277.000	19666.748	19611.517
OCCIPITAL_GM_L	2295.066	0.000	0.186	43039.854	37673.886	41290.844	39915.992
OCCIPITAL_WM_L	1491.136	0.000	0.129	25793.954	22677.850	25071.861	23830.452
PARIETAL_GM_L	3072.220	0.000	0.234	51398.146	44700.105	48106.464	48389.621
PARIETAL_WM_L	2197.555	0.000	0.180	54026.651	47240.212	52111.006	50101.919
TEMPORAL_GM_L	3147.642	0.000	0.239	58030.292	50269.837	54170.970	54473.781
TEMPORAL_WM_L	1648.762	0.000	0.141	59648.496	53087.682	58377.926	55459.609
BASAL_GANGLIA_R	868.294	0.000	0.080	9671.677	8938.889	9525.530	9267.922
DEEP_GM_R	1482.811	0.000	0.129	7893.366	7213.061	7695.831	7501.285
DEEP_WM_R	1308.085	0.000	0.115	6620.790	5962.892	6510.185	6184.057
FRONTAL_GM_R	2688.833	0.000	0.211	103082.741	90105.719	97092.268	96775.690
FRONTAL_WM_R	2021.765	0.000	0.168	106355.861	93479.533	103822.715	98109.425
LIMBIC_GM_R	2291.663	0.000	0.186	19919.356	17422.393	18838.138	18709.754
OCCIPITAL_GM_R	1728.803	0.000	0.147	42469.895	37667.758	40672.893	39904.730
OCCIPITAL_WM_R	1049.015	0.000	0.095	26347.986	23576.183	25306.893	24978.547
PARIETAL_GM_R	3846.211	0.000	0.277	53315.707	45727.536	50117.793	49330.631
PARIETAL_WM_R	2291.727	0.000	0.186	51279.590	44665.921	49536.859	47274.198
TEMPORAL_GM_R	3549.487	0.000	0.261	60319.011	51825.460	56261.745	56211.091
TEMPORAL_WM_R	1660.627	0.000	0.142	60673.429	54024.636	59258.442	56466.590
FRONTAL_INFERIOR_GM	2120.443	0.000	0.174	23722.398	20905.514	22745.349	22138.800
FRONTAL_INSULAR_GM	2156.665	0.000	0.177	13286.203	11568.422	12075.113	12767.092
FRONTAL_LATERAL_GM	2109.852	0.000	0.174	111677.489	98592.767	106286.912	104852.270
FRONTAL_MEDIAL_GM	2753.153	0.000	0.215	41418.836	35595.780	38674.689	38556.924
FRONTAL_OPERCULAR_GM	2280.471	0.000	0.185	15343.907	12961.743	13698.674	14517.283
LIMBIC_CINGULATE_GM	2212.704	0.000	0.181	27345.571	23742.063	25561.298	25771.892
LIMBIC_MEDIALTEMPORAL_GM	1530.014	0.000	0.132	13383.048	11957.330	12943.588	12549.379
OCCIPITAL_INFERIOR_GM	1302.352	0.000	0.115	9141.550	8055.521	9011.079	8339.153
OCCIPITAL_LATERAL_GM	2184.509	0.000	0.179	39585.181	34636.137	38208.952	36495.621
OCCIPITAL_MEDIAL_GM	1463.947	0.000	0.127	36783.018	32649.985	34743.706	34985.949
PARIETAL_LATERAL_GM	3476.120	0.000	0.257	77414.207	67190.488	72243.312	72689.245
PARIETAL_MEDIAL_GM	2462.147	0.000	0.197	27299.646	23237.154	25980.945	25031.008
TEMPORAL_INFERIOR_GM	2843.128	0.000	0.221	17843.229	15073.967	16388.881	16511.639
TEMPORAL_LATERAL_GM	3135.261	0.000	0.238	90379.059	78461.428	84896.647	84629.238
TEMPORAL_SUPRATEMPORAL_GM	1642.620	0.000	0.141	10127.015	8559.902	9147.187	9543.995
FRONTAL_INFERIOR_GM_L	1736.498	0.000	0.147	11663.683	10322.278	11197.053	10903.744
FRONTAL_INSULAR_GM_L	2081.802	0.000	0.172	6516.935	5660.968	5918.432	6252.415
FRONTAL_LATERAL_GM_L	2135.176	0.000	0.175	56326.785	49611.865	53539.224	52802.674
FRONTAL_MEDIAL_GM_L	2436.787	0.000	0.195	20034.036	17294.680	18744.053	18682.258
FRONTAL_OPERCULAR_GM_L	2032.127	0.000	0.168	7824.653	6628.717	6989.707	7415.589
LIMBIC_CINGULATE_GM_L	1778.395	0.000	0.150	14144.491	12314.234	13277.531	13303.722
LIMBIC_MEDIALTEMPORAL_GM_L	1328.311	0.000	0.117	6664.772	5962.766	6389.217	6307.795
OCCIPITAL_INFERIOR_GM_L	1731.098	0.000	0.147	4975.302	4212.690	4772.876	4468.445
OCCIPITAL_LATERAL_GM_L	2417.801	0.000	0.194	20080.348	17334.574	19459.225	18227.724
OCCIPITAL_MEDIAL_GM_L	1122.201	0.000	0.101	17984.204	16126.622	17058.743	17219.823
PARIETAL_LATERAL_GM_L	2853.262	0.000	0.221	37952.050	33192.965	35405.179	35912.428
PARIETAL_MEDIAL_GM_L	2019.290	0.000	0.167	13446.096	11507.141	12701.285	12477.193
TEMPORAL_INFERIOR_GM_L	2181.715	0.000	0.178	8653.258	7410.237	7998.835	8094.318
TEMPORAL_LATERAL_GM_L	2744.391	0.000	0.215	43988.051	38311.906	41342.621	41286.613
TEMPORAL_SUPRATEMPORAL_GM_L	1528.538	0.000	0.132	5388.982	4547.695	4829.513	5092.851
FRONTAL_INFERIOR_GM_R	2108.172	0.000	0.173	12058.714	10583.236	11548.297	11235.056
FRONTAL_INSULAR_GM_R	1997.350	0.000	0.166	6769.268	5907.454	6156.680	6514.677
FRONTAL_LATERAL_GM_R	1984.573	0.000	0.165	55350.704	48980.903	52747.689	52049.596
FRONTAL_MEDIAL_GM_R	2547.193	0.000	0.202	21384.801	18301.100	19930.636	19874.666
FRONTAL_OPERCULAR_GM_R	2083.818	0.000	0.172	7519.254	6333.026	6708.966	7101.694
LIMBIC_CINGULATE_GM_R	1930.367	0.000	0.161	13201.080	11427.829	12283.767	12468.171
LIMBIC_MEDIALTEMPORAL_GM_R	1393.964	0.000	0.122	6718.276	5994.564	6554.371	6241.583
OCCIPITAL_INFERIOR_GM_R	322.717	0.000	0.031	4166.248	3842.831	4238.203	3870.708
OCCIPITAL_LATERAL_GM_R	1335.732	0.000	0.117	19504.833	17301.564	18749.727	18267.896
OCCIPITAL_MEDIAL_GM_R	1573.896	0.000	0.135	18798.814	16523.363	17684.963	17766.126
PARIETAL_LATERAL_GM_R	3624.018	0.000	0.265	39462.157	33997.523	36838.132	36776.817
PARIETAL_MEDIAL_GM_R	2518.090	0.000	0.200	13853.550	11730.013	13279.660	12553.815
TEMPORAL_INFERIOR_GM_R	2566.648	0.000	0.204	9189.971	7663.731	8390.045	8417.321
TEMPORAL_LATERAL_GM_R	3141.511	0.000	0.238	46391.007	40149.522	43554.026	43342.626
TEMPORAL_SUPRATEMPORAL_GM_R	1383.030	0.000	0.121	4738.032	4012.207	4317.674	4451.144
3rd Ventricle	4.473	0.004	0.000	1149.750	1168.781	1184.132	1143.334
4th Ventricle	7.085	0.000	0.001	1653.715	1637.904	1665.784	1619.596
Right Accumbens Area	1069.750	0.000	0.096	434.155	380.151	409.048	411.192
Left Accumbens Area	689.603	0.000	0.064	451.370	405.753	422.876	435.571
Right Amygdala	1023.547	0.000	0.092	1113.429	1006.561	1074.703	1057.416
Left Amygdala	1024.283	0.000	0.093	1137.361	1032.668	1118.937	1064.740
Brain Stem	1172.221	0.000	0.105	22876.064	20794.969	22248.225	21637.898
Right Caudate	545.976	0.000	0.052	3407.197	3153.647	3439.117	3217.265
Left Caudate	578.882	0.000	0.054	3321.093	3080.073	3360.928	3140.899
Right Cerebellum Exterior	905.412	0.000	0.083	54722.242	50705.390	52012.017	53363.220
Left Cerebellum Exterior	885.979	0.000	0.081	53333.073	49549.993	50655.962	52166.798
Right Cerebellum White Matter	870.069	0.000	0.080	15337.406	14059.407	14704.081	14755.192
Left Cerebellum White Matter	892.318	0.000	0.082	15556.411	14268.379	14962.006	14937.190
Right Hippocampus	1167.899	0.000	0.104	4275.875	3914.724	4201.896	4040.191
Left Hippocampus	1098.413	0.000	0.099	3925.731	3603.708	3848.033	3736.830
Right Inferior Lateral Ventricle	26.985	0.000	0.003	294.961	324.906	306.665	305.155
Left Inferior Lateral Ventricle	24.428	0.000	0.002	255.964	279.705	286.760	257.809
Right Lateral Ventricle	21.141	0.000	0.002	12605.018	12644.066	13530.547	12094.996
Left Lateral Ventricle	53.703	0.000	0.005	14213.422	13885.867	15639.998	13092.436
Right Pallidum	586.493	0.000	0.055	1516.536	1413.041	1492.305	1459.473
Left Pallidum	378.772	0.000	0.036	1493.172	1409.730	1473.803	1448.295
Right Putamen	693.062	0.000	0.065	4313.790	3992.050	4185.060	4179.991
Left Putamen	628.364	0.000	0.059	4287.380	3980.912	4166.527	4163.229
Right Thalamus Proper	1482.811	0.000	0.129	7893.366	7213.061	7695.831	7501.285
Left Thalamus Proper	1499.191	0.000	0.130	8104.703	7391.436	7859.665	7701.634
Right Ventral DC	1165.958	0.000	0.104	5095.204	4676.385	4934.671	4883.765
Left Ventral DC	1128.446	0.000	0.101	5241.519	4816.530	5084.083	5021.177
Cerebellar Vermal Lobules I-V	686.897	0.000	0.064	4876.172	4485.219	4554.735	4806.886
Cerebellar Vermal Lobules VI-VII	111.422	0.000	0.011	2143.498	2067.141	2133.812	2085.142
Cerebellar Vermal Lobules VIII-X	391.562	0.000	0.038	3113.023	2899.777	2998.522	3025.112
Left Basal Forebrain	802.269	0.000	0.074	620.639	519.797	575.492	574.453
Right Basal Forebrain	881.447	0.000	0.081	607.431	506.439	544.673	570.865
Frontal Lobe White Matter Right	2021.765	0.000	0.168	106355.861	93479.533	103822.715	98109.425
Frontal Lobe White Matter Left	1988.816	0.000	0.165	103150.719	90807.971	101022.081	95075.806
Occipital Lobe White Matter Right	1049.015	0.000	0.095	26347.986	23576.183	25306.893	24978.547
Occipital Lobe White Matter Left	1491.136	0.000	0.129	25793.954	22677.850	25071.861	23830.452
Parietal Lobe White Matter Right	2291.727	0.000	0.186	51279.590	44665.921	49536.859	47274.198
Parietal Lobe White Matter Left	2197.555	0.000	0.180	54026.651	47240.212	52111.006	50101.919
Temporal Lobe White Matter Right	1660.627	0.000	0.142	60673.429	54024.636	59258.442	56466.590
Temporal Lobe White Matter Left	1648.762	0.000	0.141	59648.496	53087.682	58377.926	55459.609
Right Fornix	203.969	0.000	0.020	522.921	497.355	520.726	504.121
Left Fornix	310.651	0.000	0.030	612.204	577.725	594.793	594.536
Anterior Limb of Internal Capsule Right	1037.155	0.000	0.094	3598.833	3243.013	3511.645	3367.268
Anterior Limb of Internal Capsule Left	947.547	0.000	0.086	3164.686	2863.832	3124.310	2951.293
Posterior Limb of Internal Capsule Right	1390.123	0.000	0.122	2499.036	2222.523	2477.814	2312.668
Posterior Limb of Internal Capsule Left	1280.064	0.000	0.113	2436.717	2183.710	2418.730	2263.071
Corpus Callosum	796.169	0.000	0.073	13040.129	11737.559	12572.752	12347.631
Right Anterior Cingulate Gyrus	1160.019	0.000	0.104	4311.223	3594.161	3863.900	4058.958
Left Anterior Cingulate Gyrus	1068.668	0.000	0.096	5052.075	4327.144	4616.919	4775.383
Right Anterior Insula	2070.845	0.000	0.171	4434.879	3852.535	4020.878	4253.205
Left Anterior Insula	1779.993	0.000	0.151	4297.994	3764.069	3932.085	4115.989
Right Anterior Orbital Gyrus	823.806	0.000	0.076	2045.746	1767.533	1951.843	1886.849
Left Anterior Orbital Gyrus	725.901	0.000	0.067	1690.068	1474.679	1676.052	1527.687
Right Angular Gyrus	1837.439	0.000	0.155	10657.840	8909.885	9674.110	9896.371
Left Angular Gyrus	1930.253	0.000	0.161	9386.580	7859.351	8531.118	8740.430
Right Calcarine Cortex	473.286	0.000	0.045	3245.675	2911.416	3049.587	3140.386
Left Calcarine Cortex	222.454	0.000	0.022	3386.301	3133.008	3276.398	3287.574
Right Central Operculum	1938.846	0.000	0.162	3913.384	3296.591	3378.771	3820.141
Left Central Operculum	2136.638	0.000	0.175	3903.536	3278.948	3407.853	3717.700
Right Cuneus	1233.541	0.000	0.109	5571.132	4826.126	5211.280	5232.755
Left Cuneus	1257.091	0.000	0.111	5454.330	4737.208	4977.988	5213.525
Right Entorhinal Area	917.631	0.000	0.084	2682.284	2381.897	2593.879	2498.251
Left Entorhinal Area	1045.145	0.000	0.094	2604.472	2299.644	2453.877	2470.357
Right Frontal Operculum	995.180	0.000	0.090	1722.975	1464.815	1540.090	1622.006
Left Frontal Operculum	899.589	0.000	0.082	1737.267	1500.667	1554.952	1677.787
Right Frontal Pole	1340.881	0.000	0.118	3234.999	2770.207	3017.293	3027.935
Left Frontal Pole	1266.277	0.000	0.112	3308.370	2751.696	2959.396	3110.416
Right Fusiform Gyrus	2566.648	0.000	0.204	9189.971	7663.731	8390.045	8417.321
Left Fusiform Gyrus	2181.715	0.000	0.178	8653.258	7410.237	7998.835	8094.318
Right Gyrus Rectus	1565.998	0.000	0.135	2528.170	2164.108	2314.690	2388.621
Left Gyrus Rectus	1443.973	0.000	0.126	2216.218	1919.829	2035.949	2096.434
Right Inferior Occipital Gyrus	935.388	0.000	0.085	6881.185	6051.151	6793.864	6248.741
Left Inferior Occipital Gyrus	1213.570	0.000	0.108	6595.220	5794.069	6620.743	5871.924
Right Inferior Temporal Gyrus	2147.520	0.000	0.176	14078.001	12084.698	13391.924	12901.479
Left Inferior Temporal Gyrus	1892.705	0.000	0.159	12773.401	11037.425	12168.527	11760.376
Right Lingual Gyrus	1356.624	0.000	0.119	9982.007	8785.821	9424.096	9392.984
Left Lingual Gyrus	822.972	0.000	0.076	9143.573	8256.406	8804.358	8718.724
Right Lateral Orbital Gyrus	643.226	0.000	0.060	2252.699	1988.993	2236.560	2041.514
Left Lateral Orbital Gyrus	422.290	0.000	0.040	2264.930	2027.065	2162.993	2140.880
Right Middle Cingulate Gyrus	851.919	0.000	0.078	4792.752	4285.177	4601.032	4551.598
Left Middle Cingulate Gyrus	945.364	0.000	0.086	4536.124	4034.907	4320.864	4296.710
Right Medial Frontal Cortex	1073.342	0.000	0.097	2035.143	1718.052	1870.255	1903.009
Left Medial Frontal Cortex	815.526	0.000	0.075	1899.155	1629.928	1792.876	1765.371
Right Middle Frontal Gyrus	1574.197	0.000	0.136	17896.383	15627.225	16850.911	16704.374
Left Middle Frontal Gyrus	1539.708	0.000	0.133	18268.593	15963.208	17182.882	17191.000
Right Middle Occipital Gyrus	946.815	0.000	0.086	5329.725	4634.807	4991.203	5026.839
Left Middle Occipital Gyrus	2499.125	0.000	0.199	6556.275	5335.080	6028.777	5908.721
Right Medial Orbital Gyrus	1643.350	0.000	0.141	4479.283	3923.663	4279.098	4176.717
Left Medial Orbital Gyrus	1015.542	0.000	0.092	4606.967	4117.117	4461.617	4303.992
Right Postcentral Gyrus Medial Segment	400.388	0.000	0.038	1030.227	910.894	1034.528	942.269
Left Postcentral Gyrus Medial Segment	221.483	0.000	0.022	897.687	797.088	891.291	837.812
Right Precentral Gyrus Medial Segment	491.153	1.38806420676519e-311	0.047	3097.245	2762.763	3012.431	2887.877
Left Precentral Gyrus Medial Segment	619.108	0.000	0.058	2565.144	2297.513	2619.595	2290.329
Right Superior Frontal Gyrus Medial Segment	1652.642	0.000	0.141	7577.562	6406.120	7033.832	6975.354
Left Superior Frontal Gyrus Medial Segment	1755.035	0.000	0.149	6415.848	5416.655	5812.389	5995.162
Right Middle Temporal Gyrus	2208.046	0.000	0.180	14995.711	12909.339	13905.550	14019.991
Left Middle Temporal Gyrus	1812.295	0.000	0.153	14533.014	12628.609	13544.564	13714.039
Right Occipital Pole	518.527	0.000	0.049	3707.669	3280.390	3546.124	3510.760
Left Occipital Pole	770.716	0.000	0.071	3780.853	3227.784	3660.567	3426.079
Right Occipital Fusiform Gyrus	322.717	0.000	0.031	4166.248	3842.831	4238.203	3870.708
Left Occipital Fusiform Gyrus	1731.098	0.000	0.147	4975.302	4212.690	4772.876	4468.445
Right Opercular Part of Inferior Frontal Gyrus	716.384	0.000	0.067	3159.201	2718.079	2871.035	2978.902
Left Opercular Part of Inferior Frontal Gyrus	779.909	0.000	0.072	3171.163	2714.342	2936.490	2954.036
Right Orbital Part of Inferior Frontal Gyrus	48.691	0.000	0.005	1357.133	1285.929	1350.154	1328.945
Left Orbital Part of Inferior Frontal Gyrus	376.778	0.000	0.036	1545.350	1364.048	1510.021	1431.824
Right Posterior Cingulate Gyrus	1359.256	0.000	0.119	4097.104	3548.490	3818.835	3857.615
Left Posterior Cingulate Gyrus	1275.653	0.000	0.113	4556.292	3952.183	4339.748	4231.628
Right Precuneus	2466.351	0.000	0.197	12823.323	10819.119	12245.132	11611.545
Left Precuneus	2028.831	0.000	0.168	12548.409	10710.053	11809.995	11639.381
Right Parahippocampal Gyrus	1318.953	0.000	0.116	4035.991	3612.667	3960.491	3743.333
Left Parahippocampal Gyrus	1113.953	0.000	0.100	4060.301	3663.122	3935.340	3837.438
Right Posterior Insula	1117.045	0.000	0.100	2334.389	2054.919	2135.802	2261.472
Left Posterior Insula	1569.893	0.000	0.135	2218.941	1896.898	1986.347	2136.425
Right Parietal Operculum	828.011	0.000	0.076	1882.895	1571.620	1790.106	1659.547
Left Parietal Operculum	783.899	0.000	0.072	2183.850	1849.103	2026.902	2020.103
Right Postcentral Gyrus	2062.763	0.000	0.170	10211.680	8787.959	9518.689	9544.313
Left Postcentral Gyrus	2072.943	0.000	0.171	11238.828	9692.592	10555.136	10485.824
Right Posterior Orbital Gyrus	968.008	0.000	0.088	3280.986	2903.046	3080.796	3129.976
Left Posterior Orbital Gyrus	1093.443	0.000	0.098	3101.718	2703.417	2896.391	2931.185
Right Planum Polare	1274.683	0.000	0.113	1799.774	1507.291	1650.247	1684.553
Left Planum Polare	868.442	0.000	0.080	1880.540	1620.341	1733.580	1790.466
Right Precentral Gyrus	1014.585	0.000	0.092	12833.114	11550.557	12425.406	12150.419
Left Precentral Gyrus	849.382	0.000	0.078	12488.240	11338.192	12132.359	11817.825
Right Planum Temporale	708.021	0.000	0.066	1600.625	1353.733	1486.145	1472.356
Left Planum Temporale	812.809	0.000	0.075	1907.140	1601.387	1686.452	1799.265
Right Subcallosal Area	1026.690	0.000	0.093	1370.163	1133.715	1261.112	1238.506
Left Subcallosal Area	678.682	0.000	0.063	1429.703	1220.861	1343.778	1308.309
Right Superior Frontal Gyrus	1121.120	0.000	0.100	13554.696	12097.228	13067.739	12760.457
Left Superior Frontal Gyrus	1633.736	0.000	0.140	14017.653	12290.021	13438.158	12940.018
Right Supplementary Motor Cortex	1195.147	0.000	0.106	4776.519	4116.342	4438.315	4481.300
Left Supplementary Motor Cortex	1127.201	0.000	0.101	5507.966	4809.893	5139.466	5226.653
Right Supramarginal Gyrus	1592.906	0.000	0.137	8906.096	7647.879	8444.956	8178.845
Left Supramarginal Gyrus	953.817	0.000	0.087	7869.755	6958.401	7217.528	7585.864
Right Superior Occipital Gyrus	233.876	0.000	0.023	3586.255	3335.215	3418.537	3481.556
Left Superior Occipital Gyrus	132.951	0.000	0.013	3148.000	2977.641	3149.138	3021.001
Right Superior Parietal Lobule	1042.035	0.000	0.094	9686.541	8651.800	9200.377	9157.288
Left Superior Parietal Lobule	563.480	0.000	0.053	9456.887	8682.621	9101.397	9100.311
Right Superior Temporal Gyrus	960.851	0.000	0.087	7182.844	6361.499	6905.722	6744.544
Left Superior Temporal Gyrus	790.849	0.000	0.073	7203.837	6440.004	6882.105	6795.564
Right Temporal Pole	1919.586	0.000	0.160	10134.451	8793.986	9350.829	9676.612
Left Temporal Pole	1762.847	0.000	0.149	9477.799	8205.868	8747.425	9016.634
Right Triangular Part of Inferior Frontal Gyrus	559.721	0.000	0.053	3315.177	2931.678	3165.150	3098.563
Left Triangular Part of Inferior Frontal Gyrus	371.668	0.000	0.036	3527.416	3190.358	3379.918	3357.555
Right Transverse Temporal Gyrus	599.177	0.000	0.056	1337.633	1151.183	1181.281	1294.236
Left Transverse Temporal Gyrus	856.138	0.000	0.079	1601.303	1325.967	1409.481	1503.120
Note. Region, which specifies the anatomical brain region measured; F-value, indicating the test statistic from the analysis of variance (ANOVA); p-value, showing the significance level of the test; and eta_squared, representing the effect size or proportion of variance accounted for by group differences. Dimension1, Dimension2, Combined D1 D2, and Neither D1 D2 columns provide the mean volumes o…

## Sheet: 15. CD_Volumetric measures_MUSE
Supplementary Table x. Brain Region Volumetric Differences from MUSE features Across Dimension 1, Dimension 2, Mixed, and None Groups in UK Current Depression Subset (N = 1454)
Region	F-value	p_value	eta_squared	Dimension1	Dimension2	Combined D1 D2	Neither D1 D2
TOTALBRAIN	101.781	1.26e-57	0.204881	1.31393e+06	1.16824e+06	1.24577e+06	1.23774e+06
ICV	89.0709	4.03e-51	0.184004	1.51727e+06	1.36049e+06	1.43974e+06	1.43192e+06
GM	121.561	4.19e-67	0.235328	714328	632863	670924	677269
WM	74.3538	1.56e-43	0.158417	548157	486779	527988	512392
GM_L	120.875	6.92e-67	0.23431	349669	309771	328275	331749
WM_L	76.612	9.98e-45	0.162447	266688	236435	257062	248875
GM_R	122.39	2.04e-67	0.236553	354699	313674	333203	335670
WM_R	73.0887	7.11e-43	0.156143	268585	238568	258189	251185
CORPUS_CALLOSUM	23.5352	9.83e-15	0.0562322	12884.5	11776.3	12736.6	12331.2
CEREBELLUM	42.8789	4.07e-26	0.0979241	147068	136362	135551	143936
DEEP_WM_GM	71.1754	7.41e-42	0.152679	59694.2	54297.7	57473.8	56699.7
FRONTAL	98.0259	9.98e-56	0.198825	411699	362102	394131	385117
LIMBIC	86.1493	1.24e-49	0.179049	40194.9	35633.1	38661.2	38138.8
OCCIPITAL	78.4792	1.08e-45	0.16575	136178	120300	129906	127920
PARIETAL	117.989	1.46e-65	0.230003	207830	181862	195561	194646
TEMPORAL	109.032	3.31e-61	0.216319	236710	207898	225147	220997
VENTRICLE	1.49417	0.221281	0.00376845	28911.8	28001.1	25506.6	26697.5
CEREBELLUM_L	41.9425	1.39e-25	0.0959908	68002.5	63036.5	62692.7	66549
DEEP_WM_GM_L	67.6055	6.1e-40	0.146141	29535.2	26905.7	28439	28065.6
FRONTAL_L	97.5645	1.68e-55	0.198075	203926	179346	195216	190681
LIMBIC_L	73.6445	3.71e-43	0.157144	20523.5	18248	19650.4	19500.3
OCCIPITAL_L	85.3522	3.13e-49	0.177687	68068.9	59680.1	65021.6	63344
PARIETAL_L	112.875	4.72e-63	0.22225	104475	91582.8	98256.3	98355.6
TEMPORAL_L	103.632	1.46e-58	0.207833	116632	102634	111119	109123
VENTRICLE_L	2.18703	0.0910393	0.00550629	13885.7	13117.9	11953.3	12463.8
CEREBELLUM_R	43.424	1.98e-26	0.0990457	69104.9	63907.7	63412.6	67536.9
DEEP_WM_GM_R	73.2663	5.75e-43	0.156463	30159	27392	29034.9	28634.1
FRONTAL_R	97.1126	2.7e-55	0.197338	207773	182756	198914	194436
LIMBIC_R	79.3689	3.8e-46	0.167315	19671.5	17385.1	19010.9	18638.5
OCCIPITAL_R	63.4168	1.22e-37	0.138339	68109	60620.3	64884	64575.6
PARIETAL_R	117.597	2.13e-65	0.229414	103355	90279.5	97304.9	96289.9
TEMPORAL_R	109.35	2.41e-61	0.216813	120077	105264	114028	111875
VENTRICLE_R	0.997378	0.399396	0.00251865	12360.5	12133	11006.3	11562.8
BASAL_GANGLIA	47.3622	1.11e-28	0.107067	19287.5	17652.4	18552.3	18490.4
DEEP_GM	56.6101	7.14e-34	0.125352	15965.9	14575.2	15413.2	15181.8
DEEP_WM	47.7792	6.47e-29	0.107907	12779.5	11525	12308.6	11975.5
FRONTAL_GM	99.9588	1.03e-56	0.201954	204069	178994	192602	192590
FRONTAL_WM	72.4775	1.48e-42	0.155039	207630	183109	201529	192527
LIMBIC_GM	86.1493	1.24e-49	0.179049	40194.9	35633.1	38661.2	38138.8
OCCIPITAL_GM	82.0232	1.6e-47	0.171948	84954.6	74745.2	80496.2	79514.5
OCCIPITAL_WM	51.3671	6.12e-31	0.115078	51223.3	45555.2	49409.4	48405.1
PARIETAL_GM	123.147	1.03e-67	0.237667	104029	90653.8	96377.9	97890.6
PARIETAL_WM	77.6172	3.01e-45	0.164229	103801	91208.5	99183.3	96754.9
TEMPORAL_GM	134.54	6.74e-73	0.254069	117627	101791	110230	109886
TEMPORAL_WM	63.0922	1.84e-37	0.137728	119082	106106	114917	111111
BASAL_GANGLIA_L	43.7097	1.38e-26	0.0996323	9585.1	8793.46	9209	9202.12
DEEP_GM_L	55.908	1.7e-33	0.12399	8083.29	7373.17	7779.43	7687.91
DEEP_WM_L	43.9462	1.02e-26	0.100118	6184.82	5599.68	5960.33	5798.35
FRONTAL_GM_L	100.049	9.55e-57	0.202099	101678	89139.5	95846.3	95985.1
FRONTAL_WM_L	71.2439	6.88e-42	0.152804	102248	90207	99369.9	94695.7
LIMBIC_GM_L	73.6445	3.71e-43	0.157144	20523.5	18248	19650.4	19500.3
OCCIPITAL_GM_L	87.4928	2.62e-50	0.181335	42741	37380.5	40519.2	39743.8
OCCIPITAL_WM_L	56.4937	8.18e-34	0.125126	25327.9	22299.6	24502.4	23600.2
PARIETAL_GM_L	112.39	7.78e-63	0.221506	51144.3	44721	47263.4	48471.4
PARIETAL_WM_L	78.9765	5.99e-46	0.166625	53331.2	46861.9	50992.8	49884.2
TEMPORAL_GM_L	121.341	4.51e-67	0.235001	57614.9	50102.3	54041.6	54036.8
TEMPORAL_WM_L	62.96	2.14e-37	0.137479	59017.4	52531.9	57077.5	55085.7
BASAL_GANGLIA_R	49.102	1.16e-29	0.110565	9702.37	8858.93	9343.3	9288.3
DEEP_GM_R	55.7866	1.95e-33	0.123754	7882.63	7201.99	7633.73	7493.93
DEEP_WM_R	49.3174	8.75e-30	0.110996	6594.65	5925.29	6348.3	6177.17
FRONTAL_GM_R	97.1339	2.7e-55	0.197373	102390	89854.1	96755.6	96605
FRONTAL_WM_R	72.5385	1.39e-42	0.15515	105382	92901.7	102159	97831.4
LIMBIC_GM_R	79.3689	3.8e-46	0.167315	19671.5	17385.1	19010.9	18638.5
OCCIPITAL_GM_R	67.1362	1.09e-39	0.145274	42213.6	37364.7	39977	39770.7
OCCIPITAL_WM_R	40.6218	8.02e-25	0.0932502	25895.4	23255.6	24907	24805
PARIETAL_GM_R	123.645	9.73e-68	0.238401	52884.9	45932.8	49114.5	49419.2
PARIETAL_WM_R	73.3396	5.31e-43	0.156595	50469.8	44346.6	48190.4	46870.7
TEMPORAL_GM_R	135.837	3.17e-73	0.255892	60012.2	51689.1	56188	55849.2
TEMPORAL_WM_R	60.9372	2.83e-36	0.133653	60065	53574.5	57839.7	56025.6
FRONTAL_INFERIOR_GM	80.1177	1.61e-46	0.168627	23550.4	20761.3	22673.2	21913.2
FRONTAL_INSULAR_GM	83.4327	3.18e-48	0.174387	13254.9	11540.3	12159.9	12719
FRONTAL_LATERAL_GM	74.6502	1.09e-43	0.158949	110976	98422.8	105576	104987
FRONTAL_MEDIAL_GM	105.279	2.17e-59	0.21044	41086.6	35337.5	38335.5	38493.5
FRONTAL_OPERCULAR_GM	82.4321	9.86e-48	0.172657	15200.8	12931.8	13857.3	14477.9
LIMBIC_CINGULATE_GM	76.193	1.64e-44	0.161702	27051.5	23780.1	25719.9	25631.2
LIMBIC_MEDIALTEMPORAL_GM	52.397	1.6e-31	0.117115	13143.5	11853	12941.3	12507.6
OCCIPITAL_INFERIOR_GM	51.3024	6.57e-31	0.11495	9087.47	7970.19	8958.63	8334.05
OCCIPITAL_LATERAL_GM	79.8138	2.3e-46	0.168095	39442.7	34477.2	37445.5	36243.7
OCCIPITAL_MEDIAL_GM	60.845	3.15e-36	0.133477	36424.4	32297.9	34092	34936.8
PARIETAL_LATERAL_GM	121.506	4.19e-67	0.235247	76912.8	67317.1	70803.1	72864.1
PARIETAL_MEDIAL_GM	78.815	7.21e-46	0.166341	27116.3	23336.7	25574.9	25026.5
TEMPORAL_INFERIOR_GM	107.862	1.18e-60	0.214496	17604.2	14960.3	16416.6	16290.3
TEMPORAL_LATERAL_GM	123.301	1.03e-67	0.237895	89933.5	78188.5	84527.6	84000.5
TEMPORAL_SUPRATEMPORAL_GM	58.1635	9.94e-35	0.12835	10089.4	8642.54	9285.4	9595.32
FRONTAL_INFERIOR_GM_L	68.0504	3.59e-40	0.146961	11593.8	10235.1	11167.6	10786.4
FRONTAL_INSULAR_GM_L	83.4609	3.14e-48	0.174436	6496.11	5631.93	5944.9	6233.78
FRONTAL_LATERAL_GM_L	77.1955	5.03e-45	0.163482	56019.6	49505.9	53034.1	52924.3
FRONTAL_MEDIAL_GM_L	95.0487	3.04e-54	0.193958	19866.2	17146.9	18500.2	18639.9
FRONTAL_OPERCULAR_GM_L	68.9384	1.21e-40	0.148594	7702.65	6619.73	7199.4	7400.71
LIMBIC_CINGULATE_GM_L	59.9293	1.02e-35	0.131733	13976.5	12337.9	13214.5	13206.5
LIMBIC_MEDIALTEMPORAL_GM_L	49.5747	6.27e-30	0.11151	6547	5910.11	6435.86	6293.8
OCCIPITAL_INFERIOR_GM_L	64.2427	4.31e-38	0.139888	4892.75	4157.85	4735.3	4419.79
OCCIPITAL_LATERAL_GM_L	90.4986	7.29e-52	0.186403	20024.2	17279.2	19041.7	18143.1
OCCIPITAL_MEDIAL_GM_L	48.261	3.46e-29	0.108877	17824.1	15943.4	16742.2	17181
PARIETAL_LATERAL_GM_L	108.955	3.44e-61	0.216199	37741.9	33165	34645.4	35971.1
PARIETAL_MEDIAL_GM_L	67.6018	6.1e-40	0.146134	13402.4	11556	12618.1	12500.3
TEMPORAL_INFERIOR_GM_L	76.6863	9.23e-45	0.162579	8502.07	7367.11	8023.33	8007.04
TEMPORAL_LATERAL_GM_L	111.157	3.08e-62	0.21961	43734	38137.4	41161.5	40911.1
TEMPORAL_SUPRATEMPORAL_GM_L	54.1215	1.69e-32	0.120505	5378.75	4597.8	4856.83	5118.71
FRONTAL_INFERIOR_GM_R	78.1929	1.49e-45	0.165245	11956.6	10526.2	11505.5	11126.8
FRONTAL_INSULAR_GM_R	74.9229	7.85e-44	0.159437	6758.81	5908.41	6215.03	6485.19
FRONTAL_LATERAL_GM_R	68.7285	1.56e-40	0.148209	54956.4	48916.9	52541.9	52062.3
FRONTAL_MEDIAL_GM_R	97.0729	2.75e-55	0.197273	21220.4	18190.6	19835.2	19853.6
FRONTAL_OPERCULAR_GM_R	82.8438	6.3e-48	0.17337	7498.15	6312.03	6657.93	7077.14
LIMBIC_CINGULATE_GM_R	68.1544	3.18e-40	0.147153	13075	11442.2	12505.4	12424.7
LIMBIC_MEDIALTEMPORAL_GM_R	44.5566	4.54e-27	0.101367	6596.46	5942.93	6505.46	6213.84
OCCIPITAL_INFERIOR_GM_R	14.3406	3.78e-09	0.0350333	4194.72	3812.34	4223.33	3914.25
OCCIPITAL_LATERAL_GM_R	48.8436	1.61e-29	0.110047	19418.6	17197.9	18403.8	18100.7
OCCIPITAL_MEDIAL_GM_R	64.1778	4.64e-38	0.139767	18600.3	16354.4	17349.9	17755.8
PARIETAL_LATERAL_GM_R	118.929	5.38e-66	0.231411	39170.9	34152.1	36157.7	36893
PARIETAL_MEDIAL_GM_R	78.1922	1.49e-45	0.165244	13714	11780.7	12956.8	12526.2
TEMPORAL_INFERIOR_GM_R	105.851	1.15e-59	0.211343	9102.15	7593.16	8393.3	8283.22
TEMPORAL_LATERAL_GM_R	120.009	1.7e-66	0.233023	46199.5	40051.2	43366.1	43089.4
TEMPORAL_SUPRATEMPORAL_GM_R	49.0393	1.25e-29	0.110439	4710.63	4044.74	4428.57	4476.6
3rd Ventricle	0.611268	0.610101	0.00154512	1078.98	1109.45	991.399	1073.88
4th Ventricle	0.855544	0.467278	0.00216125	1586.58	1640.74	1555.63	1597.04
Right Accumbens Area	47.6435	7.7e-29	0.107634	434.766	379.269	413.067	414.726
Left Accumbens Area	29.7244	1.94e-18	0.0699851	453.235	407.249	421.533	440.537
Right Amygdala	43.69	1.41e-26	0.0995919	1104.79	996.4	1068.5	1052.65
Left Amygdala	38.7572	9.64e-24	0.0893522	1123.15	1020.99	1085.67	1052.35
Brain Stem	40.5665	8.59e-25	0.0931351	22535.5	20592.2	21352.6	21385.6
Right Caudate	26.5754	1.47e-16	0.0630383	3403.58	3111.28	3383.27	3221.33
Left Caudate	28.9409	5.67e-18	0.0682664	3324.95	3043.33	3291.3	3141.54
Right Cerebellum Exterior	41.2131	3.68e-25	0.0944792	53961.9	49981	49470.2	52930.1
Left Cerebellum Exterior	39.9694	1.91e-24	0.09189	52616.2	48873.7	48475.4	51744.5
Right Cerebellum White Matter	33.9901	5.83e-21	0.0792328	15143	13926.7	13942.4	14606.8
Left Cerebellum White Matter	33.8683	6.86e-21	0.0789713	15386.4	14162.7	14217.3	14804.5
Right Hippocampus	42.9183	3.89e-26	0.0980053	4257.59	3898.07	4066.2	4047.37
Left Hippocampus	39.9156	2.05e-24	0.0917778	3920.12	3596.2	3791.97	3747.5
Right Inferior Lateral Ventricle	1.06528	0.369975	0.00268965	289.663	307.699	255.7	284.293
Left Inferior Lateral Ventricle	0.244119	0.865549	0.000617641	247.655	255.934	243.166	244.632
Right Lateral Ventricle	0.992474	0.40014	0.00250629	12070.9	11825.3	10750.6	11278.5
Left Lateral Ventricle	2.26052	0.0829781	0.00569028	13638.1	12862	11710.1	12219.1
Right Pallidum	33.2541	1.57e-20	0.0776504	1517.92	1395.92	1435.13	1456.1
Left Pallidum	22.0623	7.64e-14	0.0528993	1490.53	1389.04	1405.5	1440.08
Right Putamen	42.345	8.25e-26	0.0968229	4346.11	3972.46	4111.83	4196.14
Left Putamen	39.1787	5.51e-24	0.0902363	4316.38	3953.85	4090.67	4179.96
Right Thalamus Proper	55.7866	1.95e-33	0.123754	7882.63	7201.99	7633.73	7493.93
Left Thalamus Proper	55.908	1.7e-33	0.12399	8083.29	7373.17	7779.43	7687.91
Right Ventral DC	43.5656	1.65e-26	0.0993366	5035.01	4637.16	4802.6	4868.29
Left Ventral DC	44.5355	4.64e-27	0.101324	5192.39	4772.67	4942.13	5006.83
Cerebellar Vermal Lobules I-V	19.0724	4.92e-12	0.0460606	4782.84	4496.86	4428.17	4781.15
Cerebellar Vermal Lobules VI-VII	1.29773	0.280256	0.00327464	2110.93	2070.1	2112.63	2078.04
Cerebellar Vermal Lobules VIII-X	17.7883	2.98e-11	0.0430931	3066.83	2850.98	2905.23	2991.17
Left Basal Forebrain	45.3386	1.62e-27	0.102963	638.717	522.201	612.6	577.366
Right Basal Forebrain	36.3354	2.49e-22	0.0842393	616.929	511.333	574.833	574.648
Frontal Lobe White Matter Right	72.5385	1.39e-42	0.15515	105382	92901.7	102159	97831.4
Frontal Lobe White Matter Left	71.2439	6.88e-42	0.152804	102248	90207	99369.9	94695.7
Occipital Lobe White Matter Right	40.6218	8.02e-25	0.0932502	25895.4	23255.6	24907	24805
Occipital Lobe White Matter Left	56.4937	8.18e-34	0.125126	25327.9	22299.6	24502.4	23600.2
Parietal Lobe White Matter Right	73.3396	5.31e-43	0.156595	50469.8	44346.6	48190.4	46870.7
Parietal Lobe White Matter Left	78.9765	5.99e-46	0.166625	53331.2	46861.9	50992.8	49884.2
Temporal Lobe White Matter Right	60.9372	2.83e-36	0.133653	60065	53574.5	57839.7	56025.6
Temporal Lobe White Matter Left	62.96	2.14e-37	0.137479	59017.4	52531.9	57077.5	55085.7
Right Fornix	6.77567	0.000166002	0.0168643	516.204	493.468	502.366	495.077
Left Fornix	6.71417	0.000180285	0.0167138	605.021	579.584	578	590.935
Anterior Limb of Internal Capsule Right	37.771	3.61e-23	0.087277	3572.15	3223.05	3414.23	3365.84
Anterior Limb of Internal Capsule Left	34.1161	4.93e-21	0.0795033	3148.06	2848.17	3014.9	2944.53
Posterior Limb of Internal Capsule Right	54.7438	7.51e-33	0.121722	2506.29	2208.76	2431.7	2316.26
Posterior Limb of Internal Capsule Left	51.0272	9.38e-31	0.114404	2431.74	2171.92	2367.43	2262.89
Corpus Callosum	23.5352	9.83e-15	0.0562322	12884.5	11776.3	12736.6	12331.2
Right Anterior Cingulate Gyrus	41.9198	1.43e-25	0.0959439	4306.14	3632.52	4039.63	4066.36
Left Anterior Cingulate Gyrus	38.0548	2.47e-23	0.0878753	5008.74	4345.53	4621.03	4716.7
Right Anterior Insula	82.54	8.8e-48	0.172844	4441.24	3848.12	3992.97	4230
Left Anterior Insula	67.6169	6.1e-40	0.146162	4268.98	3739.19	3939.5	4083.27
Right Anterior Orbital Gyrus	28.1837	1.59e-17	0.0665993	2023.94	1769.69	2045.73	1881.4
Left Anterior Orbital Gyrus	20.4709	6.92e-13	0.0492716	1657.26	1467.76	1616.13	1516.12
Right Angular Gyrus	52.3981	1.6e-31	0.117117	10585	9139.49	9775.83	9966.15
Left Angular Gyrus	71.1298	7.77e-42	0.152597	9417.59	7915.77	8234.03	8774.27
Right Calcarine Cortex	23.3183	1.33e-14	0.055743	3257.17	2889.79	3072.97	3143.31
Left Calcarine Cortex	13.1726	1.97e-08	0.0322721	3362.59	3077.74	3312.57	3282.52
Right Central Operculum	88.7285	5.95e-51	0.183426	3918.11	3271.54	3400.97	3839.6
Left Central Operculum	79.5332	3.21e-46	0.167603	3849.37	3258.17	3600.47	3709.35
Right Cuneus	49.6431	5.76e-30	0.111647	5542.87	4809.15	5112.3	5243
Left Cuneus	57.028	4.18e-34	0.12616	5377.75	4676.11	4867.66	5189.09
Right Entorhinal Area	28.7717	7.13e-18	0.0678943	2617.18	2356.93	2575.4	2472.21
Left Entorhinal Area	43.8087	1.21e-26	0.0998356	2555.47	2266.54	2491.6	2456.34
Right Frontal Operculum	33.3787	1.33e-20	0.0779186	1698.57	1466.34	1541.37	1614.84
Left Frontal Operculum	35.166	1.19e-21	0.0817499	1730.18	1497.48	1589.93	1670.09
Right Frontal Pole	38.7263	1e-23	0.0892874	3204.79	2805.36	3116.53	3039.75
Left Frontal Pole	47.0552	1.66e-28	0.106447	3322.32	2815.97	2948.23	3160.61
Right Fusiform Gyrus	105.851	1.15e-59	0.211343	9102.15	7593.16	8393.3	8283.22
Left Fusiform Gyrus	76.6863	9.23e-45	0.162579	8502.07	7367.11	8023.33	8007.04
Right Gyrus Rectus	55.9267	1.69e-33	0.124026	2513.47	2167.49	2416.5	2394.16
Left Gyrus Rectus	55.8936	1.72e-33	0.123962	2216.4	1912.87	2045.6	2067.01
Right Inferior Occipital Gyrus	37.0084	1.01e-22	0.085666	6817.72	5942.05	6440.4	6094.9
Left Inferior Occipital Gyrus	58.1446	1.01e-34	0.128314	6573.62	5665.81	6482.96	5740.68
Right Inferior Temporal Gyrus	83.3872	3.29e-48	0.174309	13973.7	12024.8	13113.7	12809.4
Left Inferior Temporal Gyrus	74.9217	7.85e-44	0.159435	12585.2	10939.4	12246.9	11597.3
Right Lingual Gyrus	52.1953	2.07e-31	0.116717	9800.22	8655.5	9164.6	9369.45
Left Lingual Gyrus	31.9936	8.7e-20	0.0749276	9083.77	8189.6	8561.93	8709.39
Right Lateral Orbital Gyrus	24.1007	4.53e-15	0.0575058	2192.77	1935.13	2097.63	1982.23
Left Lateral Orbital Gyrus	17.6262	3.72e-11	0.0427171	2244.47	2013.14	2262	2131.27
Right Middle Cingulate Gyrus	31.9722	8.91e-20	0.0748813	4733.13	4255.67	4597.6	4532.05
Left Middle Cingulate Gyrus	36.0561	3.6e-22	0.083646	4494.22	4021.2	4271.83	4276.77
Right Medial Frontal Cortex	48.1962	3.74e-29	0.108747	2022.27	1691.67	1900.43	1898.7
Left Medial Frontal Cortex	36.0723	3.54e-22	0.0836805	1896.33	1620.76	1804.03	1756.7
Right Middle Frontal Gyrus	59.0857	3.03e-35	0.13012	17736.1	15494.4	16466.6	16667.8
Left Middle Frontal Gyrus	57.5537	2.12e-34	0.127175	18106.8	15886.8	16898.1	17330
Right Middle Occipital Gyrus	32.9186	2.46e-20	0.0769273	5356.14	4698.92	5270.63	5022.45
Left Middle Occipital Gyrus	82.7244	7.15e-48	0.173163	6530.72	5396.62	6011.33	5954.72
Right Medial Orbital Gyrus	55.3375	3.48e-33	0.12288	4464.04	3948.73	4280.5	4137.13
Left Medial Orbital Gyrus	42.1553	1.05e-25	0.096431	4565.31	4069.57	4343.4	4213.1
Right Postcentral Gyrus Medial Segment	12.3642	6.16e-08	0.0303518	1025.8	913.07	969.2	946.214
Left Postcentral Gyrus Medial Segment	5.94755	0.000525379	0.0148337	886.007	810.303	913.933	866.354
Right Precentral Gyrus Medial Segment	17.1254	7.48e-11	0.0415538	3067.23	2755.64	3070.77	2897.25
Left Precentral Gyrus Medial Segment	20.4915	6.76e-13	0.0493187	2495.97	2241.6	2611.03	2276.52
Right Superior Frontal Gyrus Medial Segment	62.6633	3.1e-37	0.13692	7509.77	6380.32	6959.9	6954.25
Left Superior Frontal Gyrus Medial Segment	69.8619	3.79e-41	0.150285	6392.28	5422.98	5810.3	6028.18
Right Middle Temporal Gyrus	86.1264	1.24e-49	0.17901	14976.6	12843.2	13877.9	13924.9
Left Middle Temporal Gyrus	64.6175	2.72e-38	0.14059	14492.7	12659.3	13460.3	13524
Right Occipital Pole	21.9226	9.21e-14	0.0525819	3671.19	3207.92	3360.43	3445.76
Left Occipital Pole	26.4967	1.63e-16	0.0628633	3729.09	3217.87	3389.57	3393.96
Right Occipital Fusiform Gyrus	14.3406	3.78e-09	0.0350333	4194.72	3812.34	4223.33	3914.25
Left Occipital Fusiform Gyrus	64.2427	4.31e-38	0.139888	4892.75	4157.85	4735.3	4419.79
Right Opercular Part of Inferior Frontal Gyrus	21.7682	1.14e-13	0.052231	3169.91	2767.39	2984.86	2983.4
Left Opercular Part of Inferior Frontal Gyrus	27.0516	7.61e-17	0.0640955	3161.66	2731.98	2999.33	2953.14
Right Orbital Part of Inferior Frontal Gyrus	1.43045	0.238702	0.00360831	1354.21	1309.33	1411.23	1353.25
Left Orbital Part of Inferior Frontal Gyrus	22.0035	8.26e-14	0.0527656	1553.78	1332.95	1446.97	1434.6
Right Posterior Cingulate Gyrus	45.4783	1.35e-27	0.103248	4035.72	3553.99	3868.16	3826.3
Left Posterior Cingulate Gyrus	35.9497	4.14e-22	0.0834197	4473.5	3971.14	4321.63	4213.01
Right Precuneus	76.2146	1.62e-44	0.161741	12688.2	10867.7	11987.6	11580
Left Precuneus	70.089	2.87e-41	0.1507	12516.4	10745.7	11704.1	11634
Right Parahippocampal Gyrus	42.4531	7.17e-26	0.097046	3979.28	3586	3930.07	3741.63
Left Parahippocampal Gyrus	37.7034	3.94e-23	0.0871345	3991.53	3643.57	3944.27	3837.46
Right Posterior Insula	36.817	1.3e-22	0.0852606	2317.57	2060.29	2222.07	2255.19
Left Posterior Insula	67.762	5.13e-40	0.146429	2227.13	1892.74	2005.4	2150.51
Right Parietal Operculum	34.5266	2.84e-21	0.0803828	1881.47	1574.15	1715.6	1622.7
Left Parietal Operculum	18.5971	9.56e-12	0.0449642	2123.1	1864.07	2009	2021.26
Right Postcentral Gyrus	86.5811	7.81e-50	0.179785	10222.7	8753.51	9188.6	9582.12
Left Postcentral Gyrus	86.131	1.24e-49	0.179018	11171.9	9649.42	10216.7	10579.8
Right Posterior Orbital Gyrus	45.2996	1.69e-27	0.102884	3275.83	2872.65	3081.67	3126.1
Left Posterior Orbital Gyrus	51.3278	6.4e-31	0.115	3126.78	2684.6	2946.1	2925.9
Right Planum Polare	56.3432	9.88e-34	0.124834	1804	1513.11	1664.17	1706.4
Left Planum Polare	35.4037	8.68e-22	0.082257	1921.18	1653.37	1760.33	1829.4
Right Precentral Gyrus	40.9346	5.32e-25	0.0939007	12785.3	11501.7	12421.2	12215.9
Left Precentral Gyrus	28.362	1.25e-17	0.0669923	12360.6	11320.8	12163.1	11834.9
Right Planum Temporale	23.9818	5.32e-15	0.0572382	1600.97	1372.89	1480.6	1481.38
Left Planum Temporale	25.5531	6.02e-16	0.0607606	1885.76	1618.71	1671.07	1793.53
Right Subcallosal Area	42.229	9.58e-26	0.0965833	1358.22	1121.69	1256.6	1202.67
Left Subcallosal Area	29.9398	1.45e-18	0.0704565	1402.29	1187.57	1245.3	1267.36
Right Superior Frontal Gyrus	38.8347	8.73e-24	0.0895151	13409.8	12072.5	12944.3	12706.2
Left Superior Frontal Gyrus	68.3015	2.66e-40	0.147423	14024.3	12216.6	13207.4	12884
Right Supplementary Motor Cortex	57.7448	1.67e-34	0.127544	4749.39	4073.77	4231.03	4506.56
Left Supplementary Motor Cortex	50.8763	1.14e-30	0.114104	5462.96	4761.1	4983.96	5244.13
Right Supramarginal Gyrus	58.0885	1.08e-34	0.128206	8717.6	7550.83	8131.16	8160.46
Left Supramarginal Gyrus	34.4541	3.12e-21	0.0802277	7712.13	6903.85	7119.73	7523.8
Right Superior Occipital Gyrus	9.79387	2.34e-06	0.0241947	3573.53	3349.01	3332.37	3537.55
Left Superior Occipital Gyrus	6.49521	0.000244366	0.0161776	3190.71	2998.95	3157.83	3053.69
Right Superior Parietal Lobule	32.9511	2.36e-20	0.0769973	9645.61	8708.27	9062.1	9184.28
Left Superior Parietal Lobule	21.1183	2.82e-13	0.0507508	9440.29	8695.96	9074.9	9093.22
Right Superior Temporal Gyrus	29.0218	5.09e-18	0.0684441	7118.92	6394.71	6969.23	6708.67
Left Superior Temporal Gyrus	33.7841	7.66e-21	0.0787905	7198.73	6412.33	6582.9	6780.16
Right Temporal Pole	81.664	2.44e-47	0.171324	10130.3	8788.51	9405.3	9646.51
Left Temporal Pole	81.6545	2.44e-47	0.171308	9457.48	8126.32	8871.36	9009.62
Right Triangular Part of Inferior Frontal Gyrus	16.2318	2.63e-10	0.0394711	3296.22	2966.21	3197.13	3095.96
Left Triangular Part of Inferior Frontal Gyrus	10.6093	7.39e-07	0.0261564	3490.15	3200.82	3371.03	3327.11
Right Transverse Temporal Gyrus	17.4784	4.57e-11	0.0423742	1305.66	1158.74	1283.8	1288.82
Left Transverse Temporal Gyrus	29.9245	1.48e-18	0.0704232	1571.81	1325.72	1425.43	1495.78
Note. Region, which specifies the anatomical brain region measured; F-value, indicating the test statistic from the analysis of variance (ANOVA); p-value, showing the significance level of the test; and eta_squared, representing the effect size or proportion of variance accounted for by group differences. Dimension1, Dimension2, Combined D1 D2, and Neither D1 D2 columns provide the mean volumes o…

## Sheet: 16. GP_cog_metabolic_phys
UKB Category	Field ID	UKB decsription	age	sex	Dimension	age_b	sex_b	Dimension_b	age_CI_lower	age_CI_upper	sex_CI_lower	sex_CI_upper	Dimension_CI_lower	Dimension_CI_upper	n	out	dvMean	dvSD	age_p	sex_p	Dimension_p
Physical Measures	23129	Trunk fat-free mass	0.038882	0.726231	0.037095	-0.10457	-1.69952	-0.20733	-0.11345	-0.0957	-1.71732	-1.68171	-0.22536	-0.18931	22581	1	29.5247	5.88789	8.63067e-115	0	1.86e-108
Physical Measures	23130	Trunk predicted mass	0.038675	0.733765	0.036942	-0.10286	-1.70867	-0.20406	-0.11162	-0.09411	-1.72624	-1.69111	-0.22185	-0.18628	22579	2	28.3248	5.71127	3.38946e-114	0	2.75e-108
Metabolics	3063	Forced expiratory volume in 1-second (FEV1)	0.202127	0.44902	0.02253	-0.35739	-1.28383	-0.21849	-0.36992	-0.34485	-1.30894	-1.25871	-0.2439	-0.19307	21133	44	2.75098	0.735932	0	0	1.66e-61
Cognition	20016	fluid intelligence score (based on # of questions answered correctly in two minutes)	0.004921	0.005497	0.015846	-0.06974	-0.14795	-0.25556	-0.08693	-0.05256	-0.18243	-0.11346	-0.29046	-0.22066	22284	304	6.66947	1.96136	4.81e-15	5.84e-17	5.73e-45
Cognition	6373	Number of puzzles correctly solved in 3 minutes	0.053974	0.010224	0.016375	-0.23152	-0.1972	-0.25139	-0.25157	-0.21147	-0.23734	-0.15707	-0.29169	-0.21108	15774	21	8.08145	2.09234	########	9.84e-22	8.33e-33
Physical Measures	47	Hand grip strength (right)	0.08463	0.531364	0.00814	-0.20718	-1.45423	-0.12524	-0.21871	-0.19564	-1.47735	-1.43111	-0.14864	-0.10183	23010	35	31.3838	10.418	2.23765e-258	0	2.01e-24
Physical Measures	46	Hand grip strength (left)	0.08903	0.53682	0.007038	-0.21088	-1.4556	-0.11522	-0.2223	-0.19946	-1.47849	-1.43271	-0.13839	-0.09205	23007	25	29.141	10.4057	3.15886e-272	0	3.19e-21
Cognition	4282	Maximum number of digits correctly remembered in the reverse order	0.012187	0.007288	0.008485	-0.10979	-0.16974	-0.18397	-0.13052	-0.08906	-0.21129	-0.12819	-0.22568	-0.14226	16327	999	6.88596	1.05269	1.67e-24	1.66e-15	7.76e-17
Cognition	6348	Duration (in deciseconds) to complete numeric path(trail #1)	0.118787	0.003502	0.006686	0.344393	-0.11143	0.15481	0.324647	0.364139	-0.151	-0.07186	0.115089	0.194532	15879	621	213.313	52.6589	########	4.07e-08	2.65e-13
Cognition	23324	Number of symbol digit matches made correctly in 60 seconds	0.177904	1.28e-05	0.00536	-0.42471	-0.00655	-0.13473	-0.44365	-0.40577	-0.04448	0.031379	-0.1728	-0.09665	15776	107	19.2938	5.01939	0	0.74252	4.26e-11
Cognition	6350	Duration (in deciseconds) to complete alphanumeric path(trail #2)	0.048717	0.000331	0.003876	0.2236	-0.03599	0.123866	0.202894	0.244306	-0.07745	0.005482	0.082254	0.165478	15879	498	513.367	190.145	3.74e-96	0.094697	5.01e-08
Physical Measures	23111	Leg fat percentage (right)	0.005828	0.744817	0.002517	0.038665	1.73146	0.051536	0.030047	0.047282	1.71416	1.74875	0.034027	0.069044	22581	0	32.0118	10.531	4.56e-18	0	6.7e-08
Physical Measures	23115	Leg fat percentage (left)	0.005444	0.771796	0.002278	0.035317	1.76194	0.046341	0.027171	0.043464	1.74559	1.77829	0.02979	0.062892	22581	0	31.8499	10.5267	5.43e-17	0	3.15e-07
Metabolics	23556	Free Cholesterol in Very Large HDL	0.002315	0.153347	0.002809	0.043725	0.773457	-0.09776	0.024303	0.063148	0.734573	0.812342	-0.13718	-0.05835	14608	238	0.023211	0.006516	1.53e-05	########	8.35e-06
Physical Measures	23119	Arm fat percentage (right)	0.001671	0.411241	0.001728	0.031404	1.28736	0.064883	0.018297	0.04451	1.26106	1.31367	0.038254	0.091512	22581	28	27.6468	9.33948	4.2e-06	0	1.19e-05
Metabolics	23454	Monounsaturated Fatty Acids to Total Fatty Acids percentage	6.55e-05	0.081061	0.002527	0.007788	-0.57233	0.098325	-0.01269	0.028265	-0.61334	-0.53132	0.056754	0.139896	14592	43	23.2661	2.49726	0.460631	########	2.23e-05
Metabolics	23447	Monounsaturated Fatty Acids	0.00867	0.011795	0.002524	0.093079	-0.21771	0.10159	0.071813	0.114345	-0.26029	-0.17513	0.058435	0.144745	14592	171	2.76692	0.716815	2.92e-17	2.16e-23	2.33e-05
Metabolics	30270	Mean cell volume (MCV)	0.021269	4.61e-05	0.010798	0.147844	-0.01356	-0.21321	0.100511	0.195177	-0.10775	0.080633	-0.30952	-0.1169	2879	14	91.1984	5.39993	2.08e-09	0.77774	7.4e-05
Metabolics	30710	C-reactive protein (CRP)	0.007421	0.000437	0.001541	0.086743	0.042121	0.080003	0.068953	0.104533	0.006402	0.07784	0.04389	0.116116	22282	1298	1.37109	1.17646	5.26e-21	0.023424	7.4e-05
Physical Measures	23123	Arm fat percentage (left)	0.001032	0.422878	0.001435	0.024431	1.30563	0.058524	0.011456	0.037407	1.27959	1.33167	0.032162	0.084885	22581	21	28.3239	9.56694	0.000281	0	7.4e-05
Metabolics	23552	Total Lipids in Very Large HDL	0.004051	0.204794	0.001887	0.056312	0.896977	-0.07789	0.037446	0.075177	0.859212	0.934742	-0.11617	-0.03961	14608	206	0.167589	0.073531	8.79e-09	0	0.000302
LifeStyle Factors	2139	Age first had sexual intercourse	0.04746	0.004016	0.001183	0.219971	-0.12557	-0.06888	0.203323	0.23662	-0.15898	-0.09216	-0.1027	-0.03507	23782	734	19.0274	2.99171	########	2.28e-13	0.000302
Metabolics	23555	Cholesteryl Esters in Very Large HDL	0.002891	0.206247	0.001787	0.04747	0.899798	-0.0757	0.028647	0.066292	0.862109	0.937487	-0.1139	-0.0375	14608	185	0.059117	0.025848	1.31e-06	0	0.000445
Metabolics	30000	White blood cell (leukocyte) count	0.004061	0.00213	0.008094	0.064112	-0.09257	0.185747	0.018092	0.110132	-0.18442	-0.00072	0.0915	0.279995	3056	28	6.70503	1.59402	0.007064	0.053044	0.000455
Metabolics	23553	Phospholipids in Very Large HDL	0.004197	0.20762	0.001765	0.057188	0.902855	-0.07518	0.038375	0.076002	0.865184	0.940525	-0.11337	-0.03699	14608	191	0.078534	0.041654	4.76e-09	0	0.000455
Metabolics	23551	Concentration of Very Large HDL Particles	0.006011	0.194414	0.001695	0.069044	0.873158	-0.07423	0.050057	0.08803	0.835149	0.911166	-0.11276	-0.0357	14608	227	0.000232	8.63e-05	2.32e-12	0	0.000609
Physical Measures	23099	Body fat percentage	0.005946	0.429952	0.001064	0.058243	1.31252	0.049934	0.04539	0.071095	1.28673	1.33831	0.023823	0.076045	22574	0	30.8891	8.13926	2.21e-18	0	0.000655
Metabolics	23453	Polyunsaturated Fatty Acids to Total Fatty Acids percentage	0.00227	0.04872	0.001603	-0.04675	0.444138	-0.07969	-0.06765	-0.02585	0.402288	0.485989	-0.12211	-0.03728	14592	102	42.8864	3.38695	1.71e-05	1.79e-93	0.00082
Metabolics	23452	Omega-6 Fatty Acids to Total Fatty Acids percentage	0.019909	0.031577	0.001508	-0.13951	0.354026	-0.07723	-0.16037	-0.11864	0.312228	0.395824	-0.1196	-0.03486	14592	96	38.4371	3.28637	3.85e-38	1.06e-60	0.00121
Metabolics	23483	Phospholipids in Chylomicrons and Extremely Large VLDL	0.001074	0.082668	0.001496	0.031261	-0.57323	0.074877	0.010877	0.051645	-0.61405	-0.53241	0.03352	0.116234	14608	183	0.029984	0.026684	0.003054	########	0.001283
Metabolics	23486	Free Cholesterol in Chylomicrons and Extremely Large VLDL	0.001321	0.074783	0.001449	0.034813	-0.54494	0.073976	0.014372	0.055254	-0.58587	-0.504	0.032496	0.115455	14608	157	0.021577	0.016621	0.000998	########	0.001516
Metabolics	23456	Linoleic Acid to Total Fatty Acids percentage	0.015832	0.021565	0.001387	-0.12541	0.294001	-0.0748	-0.14647	-0.10436	0.251838	0.336164	-0.11753	-0.03208	14592	57	29.4428	3.17439	1.18e-30	6.25e-42	0.001811
Metabolics	4080	Systolic blood pressure, automated reading	0.095969	0.019407	0.001059	0.305746	-0.26453	0.06206	0.288291	0.3232	-0.29951	-0.22956	0.026604	0.097515	19055	79	139.657	19.0764	########	4.58e-49	0.001811
Metabolics	23482	Total Lipids in Chylomicrons and Extremely Large VLDL	0.000673	0.081962	0.001376	0.024886	-0.5737	0.072208	0.00438	0.045391	-0.61476	-0.53263	0.030599	0.113816	14608	202	0.191351	0.168457	0.01912	########	0.001958
Metabolics	23481	Concentration of Chylomicrons and Extremely Large VLDL Particles	0.001388	0.080759	0.001294	0.035677	-0.56798	0.06989	0.015207	0.056147	-0.60897	-0.527	0.028366	0.111413	14608	202	1.42e-06	1.26e-06	0.00077	########	0.002752
Metabolics	30750	Glycated haemoglobin (HbA1c)	0.072329	0.00028	0.00085	0.271282	-0.03263	0.057514	0.254287	0.288276	-0.06676	0.001497	0.023021	0.092008	22080	508	34.4867	3.5631	########	0.066288	0.002983
Metabolics	23485	Cholesteryl Esters in Chylomicrons and Extremely Large VLDL	0.000315	0.082421	0.001162	0.017006	-0.57519	0.06634	-0.00343	0.037443	-0.61613	-0.53426	0.024859	0.107821	14608	129	0.027537	0.020926	0.106093	########	0.004597
	20127	Neuroticism score	0.012091	0.01924	0.000825	-0.10887	0.277	0.057402	-0.12659	-0.09115	0.24139	0.31261	0.021431	0.093374	20286	0	3.77014	3.1584	1.41e-32	8.5e-52	0.004597
Metabolics	23526	Cholesterol in IDL	0.010717	0.051245	0.002409	0.101143	0.451144	-0.09675	0.067925	0.134361	0.384788	0.517499	-0.16404	-0.02945	5794	18	0.841575	0.197173	4.76e-09	2.26e-39	0.011825
Cognition	20197	Number of word pairs correctly associated	0.027203	0.02679	0.000874	-0.16351	0.325123	-0.05819	-0.18365	-0.14337	0.284762	0.365483	-0.09873	-0.01766	15879	0	7.05567	2.55508	1.78e-55	3.26e-55	0.011825
LifeStyle Factors	2149	Lifetime number of sexual partners	0.045972	0.010424	0.000617	-0.21799	-0.20437	-0.04999	-0.23517	-0.20081	-0.23883	-0.16992	-0.0848	-0.01518	23782	1752	4.31425	3.61387	########	5.69e-31	0.011825
Metabolics	23495	Concentration of Large VLDL Particles	0.002654	0.089175	0.000869	0.049103	-0.59658	0.056989	0.028814	0.069392	-0.63721	-0.55594	0.0158	0.098178	14608	100	9.81e-06	5.27e-06	3.4e-06	########	0.015786
Metabolics	23489	Total Lipids in Very Large VLDL	0.002141	0.092327	0.000861	0.044037	-0.60733	0.056652	0.023751	0.064322	-0.64796	-0.5667	0.015481	0.097824	14608	130	0.189142	0.123033	2.9e-05	########	0.016124
Metabolics	23488	Concentration of Very Large VLDL Particles	0.002318	0.094897	0.00083	0.045698	-0.61489	0.055466	0.025475	0.065922	-0.6554	-0.57439	0.014422	0.09651	14608	120	3.24e-06	2.1e-06	1.43e-05	########	0.018196
Metabolics	23487	Triglycerides in Chylomicrons and Extremely Large VLDL	0.001346	0.077189	0.002079	0.035596	-0.55964	0.089535	0.002217	0.068976	-0.62626	-0.49303	0.022014	0.157057	5794	98	0.118886	0.106725	0.039401	2.18e-58	0.020606
Metabolics	23472	Pyruvate	5.79e-05	0.003781	0.000795	-0.0076	0.123233	0.05719	-0.02895	0.013757	0.080465	0.166002	0.01383	0.10055	14573	165	0.078259	0.024816	0.485515	2e-08	0.020966
Metabolics	23490	Phospholipids in Very Large VLDL	0.002011	0.089243	0.000781	0.042675	-0.59596	0.053933	0.022406	0.062943	-0.63655	-0.55537	0.012795	0.09507	14608	106	0.03572	0.024097	4.96e-05	########	0.021459
Metabolics	23497	Phospholipids in Large VLDL	0.002184	0.093649	0.000764	0.044356	-0.61058	0.053222	0.024162	0.064551	-0.65104	-0.57012	0.012217	0.094227	14608	79	0.063164	0.03776	2.38e-05	########	0.022622
Metabolics	23496	Total Lipids in Large VLDL	0.002371	0.087774	0.000748	0.046396	-0.5913	0.052878	0.026112	0.06668	-0.63194	-0.55067	0.011692	0.094063	14608	97	0.318679	0.169401	1.13e-05	########	0.023968
Metabolics	23484	Cholesterol in Chylomicrons and Extremely Large VLDL	0.001241	0.077738	0.001882	0.033604	-0.5532	0.083895	0.000887	0.066321	-0.6186	-0.48781	0.017583	0.150207	5794	56	0.051221	0.038076	0.046453	3.74e-59	0.025837
Metabolics	23500	Free Cholesterol in Large VLDL	0.002402	0.092092	0.000719	0.046542	-0.60514	0.051647	0.026345	0.066738	-0.64559	-0.56468	0.010641	0.092652	14608	70	0.044597	0.024026	9.82e-06	########	0.025837
Metabolics	23493	Free Cholesterol in Very Large VLDL	0.002246	0.082519	0.000723	0.045321	-0.57372	0.05214	0.024967	0.065675	-0.61448	-0.53296	0.010827	0.093454	14608	92	0.022119	0.01345	1.85e-05	########	0.025837
Metabolics	23562	Cholesteryl Esters in Large HDL	0.002811	0.228617	0.000693	0.046387	0.952269	-0.04669	0.027797	0.064977	0.915047	0.989491	-0.08443	-0.00896	14608	83	0.238022	0.128568	1.68e-06	0	0.028562
Metabolics	23554	Cholesterol in Very Large HDL	0.002755	0.192249	0.001776	0.046587	0.863085	-0.07569	0.016118	0.077055	0.802268	0.923903	-0.13738	-0.01401	5794	77	0.083395	0.031815	0.003117	########	0.029672
Metabolics	23563	Free Cholesterol in Large HDL	0.005886	0.239106	0.000669	0.066857	0.975051	-0.04563	0.048357	0.085358	0.938014	1.01209	-0.08317	-0.00809	14608	106	0.068984	0.036611	2.99e-12	0	0.030992
Metabolics	23558	Concentration of Large HDL Particles	0.005906	0.236639	0.00062	0.067207	0.971868	-0.04408	0.048652	0.085763	0.934722	1.00901	-0.08173	-0.00643	14608	91	0.001446	0.000753	2.73e-12	0	0.038478
Metabolics	23527	Cholesteryl Esters in IDL	0.006799	0.049552	0.000604	0.080762	0.446331	-0.04868	0.060004	0.101521	0.40476	0.487903	-0.0908	-0.00656	14608	41	0.627071	0.148127	6.3e-14	1.39e-95	0.040848
Metabolics	23494	Triglycerides in Very Large VLDL	0.00357	0.087575	0.001469	0.057365	-0.59317	0.074478	0.024467	0.090263	-0.65889	-0.52745	0.007834	0.141123	5794	63	0.100895	0.071456	0.00077	1.01e-66	0.048666
Physical Measures	23127	Trunk fat percentage	0.005758	0.140181	0.000328	0.070399	0.749756	0.034047	0.0546	0.086197	0.718044	0.781468	0.001942	0.066152	22581	43	30.5985	7.49855	7.33e-18	0	0.063198
	20438	Duration of worst depression	0.00024	0.010002	0.000788	-0.01541	0.205748	0.057381	-0.04189	0.011068	0.151292	0.260204	0.00302	0.111742	9402	111	2.98278	1.50619	0.259188	1.87e-13	0.063632
Metabolics	23559	Total Lipids in Large HDL	0.005941	0.239315	0.000488	0.067179	0.975808	-0.03898	0.048685	0.085673	0.938781	1.01283	-0.07652	-0.00145	14608	88	0.668041	0.317861	2.4e-12	0	0.067801
Metabolics	23528	Free Cholesterol in IDL	0.00914	0.045798	0.000475	0.094061	0.429664	-0.04335	0.073239	0.114883	0.387967	0.47136	-0.08561	-0.00109	14608	43	0.221497	0.052118	2.93e-18	2.31e-88	0.070859
Physical Measures	23124	Arm fat mass (left)	0.0004	0.036079	0.000312	-0.01973	0.382667	-0.0354	-0.03683	-0.00264	0.348365	0.41697	-0.07013	-0.00066	22581	713	1.11433	0.455669	0.025777	########	0.071969
Physical Measures	23112	Leg fat mass (right)	0.001136	0.3651	0.00029	-0.02692	1.21476	-0.02763	-0.04061	-0.01322	1.18727	1.24225	-0.05546	0.000206	22581	262	4.0337	1.58816	0.00015	0	0.080007
Metabolics	23510	Total Lipids in Small VLDL	0.009481	0.033047	0.000439	0.095572	-0.36161	0.041564	0.074781	0.116363	-0.40324	-0.31998	-0.00064	0.083766	14608	65	0.406565	0.126103	8.22e-19	1.09e-63	0.081576
Metabolics	23509	Concentration of Small VLDL Particles	0.00904	0.039738	0.000432	0.093103	-0.39705	0.041133	0.072357	0.11385	-0.43859	-0.35551	-0.00098	0.083242	14608	66	3.87e-05	1.25e-05	4.63e-18	1.67e-76	0.082086
Physical Measures	23116	Leg fat mass (left)	0.001147	0.38473	0.000282	-0.02663	1.24696	-0.02683	-0.04011	-0.01314	1.2199	1.27402	-0.05423	0.000567	22581	261	3.9701	1.57335	0.00014	0	0.082086
Metabolics	30610	Alkaline phosphatase (ALP)	0.025392	3.31e-05	0.000277	0.161037	0.011535	0.033747	0.143796	0.178278	-0.02309	0.046161	-0.00127	0.068768	22327	238	78.1721	19.6626	4.03e-73	0.524349	0.085796
Metabolics	23524	Total Lipids in IDL	0.010219	0.043947	0.000397	0.099295	0.419604	-0.03953	0.078508	0.120081	0.377975	0.461233	-0.08171	0.002654	14608	47	1.24054	0.267867	3.42e-20	1.05e-84	0.095062
Metabolics	23578	Triglycerides in Small HDL	0.010513	0.061296	0.000907	0.099021	-0.4905	0.058639	0.066107	0.131934	-0.55627	-0.42474	-0.00804	0.125316	5794	45	0.049959	0.015856	7.13e-09	8.59e-47	0.11969
Physical Measures	23104	Body mass index (BMI)	0.000232	0.015252	0.000227	-0.0152	-0.24941	0.030548	-0.03236	0.001961	-0.28384	-0.21498	-0.00431	0.065403	22581	293	26.2953	3.96736	0.086028	2.99e-45	0.11969
Physical Measures	23120	Arm fat mass (right)	0.000318	0.035405	0.000214	-0.01761	0.379302	-0.02933	-0.03473	-0.0005	0.344967	0.413637	-0.0641	0.005433	22581	713	1.05838	0.418055	0.046453	########	0.135015
Metabolics	30180	Lymphocyte ratio	0.008387	0.019689	0.001472	-0.09121	0.280493	-0.07809	-0.1366	-0.04581	0.1899	0.371086	-0.17119	0.015001	3052	14	27.4555	7.08602	0.00011	1.84e-09	0.135745
Metabolics	23565	Concentration of Medium HDL Particles	0.009293	0.165297	0.000314	0.088607	0.815488	0.032912	0.06914	0.108074	0.776495	0.85448	-0.00661	0.072429	14608	57	0.003917	0.000896	1.71e-18	0	0.137253
Metabolics	23569	Cholesteryl Esters in Medium HDL	0.004769	0.166809	0.000299	0.063474	0.821783	0.032202	0.043973	0.082975	0.782721	0.860844	-0.00739	0.071791	14608	49	0.416004	0.095906	3.61e-10	0	0.14635
Metabolics	23560	Phospholipids in Large HDL	0.0072	0.241722	0.000281	0.073871	0.980697	-0.02953	0.055411	0.092331	0.943733	1.01766	-0.067	0.007936	14608	81	0.331618	0.15008	1.18e-14	0	0.159409
Metabolics	23492	Cholesteryl Esters in Very Large VLDL	0.001238	0.06682	0.000258	0.033941	-0.5166	0.031412	0.013435	0.054447	-0.55766	-0.47554	-0.0102	0.073026	14608	48	0.029178	0.014276	0.001375	########	0.17873
	4609	Longest period of depression	0.008427	0.000126	0.000294	-0.09248	0.022836	-0.03515	-0.1169	-0.06806	-0.02667	0.072342	-0.08501	0.014714	12048	988	6.43445	8.22205	2.91e-13	0.377338	0.212042
Metabolics	23473	Citrate	0.017158	0.018444	0.000223	0.131592	0.273418	0.03016	0.110377	0.152807	0.230932	0.315904	-0.0129	0.073218	14606	87	0.064664	0.012159	4.4e-33	5.06e-36	0.212749
Metabolics	23561	Cholesterol in Large HDL	0.002495	0.220343	0.000492	0.044167	0.937598	-0.03968	0.01396	0.074373	0.877274	0.997923	-0.10087	0.021516	5794	28	0.304983	0.163381	0.004694	########	0.249533
Metabolics	23501	Triglycerides in Large VLDL	0.003404	0.082074	0.000493	0.056453	-0.57686	0.04348	0.023316	0.089589	-0.64303	-0.51068	-0.02364	0.110605	5794	58	0.1555	0.082621	0.000998	1.54e-62	0.249533
Metabolics	23515	Triglycerides in Small VLDL	0.016075	0.048056	0.000473	0.123768	-0.43461	0.042656	0.090587	0.156949	-0.50089	-0.36833	-0.02456	0.109877	5794	44	0.149457	0.054737	7.16e-13	8.56e-37	0.257785
Metabolics	23571	Triglycerides in Medium HDL	0.016897	0.001054	0.000431	0.129607	-0.06417	0.041584	0.09569	0.163524	-0.13194	0.00361	-0.02713	0.110303	5794	58	0.051209	0.01651	1.99e-13	0.068339	0.280919
Metabolics	23503	Total Lipids in Medium VLDL	0.004389	0.031681	0.000159	0.065338	-0.35646	0.025194	0.044393	0.086283	-0.39841	-0.31452	-0.01732	0.067709	14608	66	0.571226	0.199292	1.92e-09	4.27e-61	0.289233
Metabolics	23570	Free Cholesterol in Medium HDL	0.011416	0.1847	0.000151	0.096962	0.860196	0.022476	0.077767	0.116158	0.821748	0.898645	-0.01649	0.06144	14608	56	0.088829	0.023982	2.07e-22	0	0.300726
	20434	Age at last episode of depression	0.069485	0.001229	0.000212	0.262013	0.069254	0.028653	0.235451	0.288575	0.014554	0.123954	-0.02582	0.083121	9402	780	48.7157	12.5955	1.45e-79	0.014902	0.348175
	4620	Number of depression episodes	0.007748	0.000269	0.000142	-0.08858	-0.03332	-0.02433	-0.11284	-0.06432	-0.08246	0.015814	-0.0738	0.025145	12048	839	1.52886	1.99394	1.96e-12	0.191492	0.381285
Metabolics	23522	Triglycerides in Very Small VLDL	0.024045	0.009653	0.000237	0.155036	-0.195	0.030837	0.121096	0.188975	-0.26287	-0.12713	-0.03798	0.099654	5794	77	0.065365	0.018199	1.71e-18	2.26e-08	0.427156
Metabolics	23491	Cholesterol in Very Large VLDL	0.003712	0.068863	0.000227	0.059044	-0.52552	0.029569	0.025962	0.092125	-0.59161	-0.45944	-0.03747	0.096609	5794	27	0.051246	0.027283	0.000585	1.02e-52	0.430712
Metabolics	23499	Cholesteryl Esters in Large VLDL	0.0032	0.051757	8.45e-05	0.054951	-0.45359	0.018092	0.034326	0.075576	-0.49488	-0.4123	-0.02375	0.059939	14608	43	0.050125	0.022958	3.08e-07	########	0.436407
Metabolics	23529	Triglycerides in IDL	0.026225	0.00068	0.000196	0.164482	-0.05226	0.02845	0.130085	0.198879	-0.12099	0.016473	-0.04126	0.098158	5794	71	0.095081	0.022323	4.25e-20	0.143366	0.460883
Metabolics	23508	Triglycerides in Medium VLDL	0.00708	0.062285	0.000181	0.081751	-0.49817	0.026387	0.048588	0.114915	-0.56439	-0.43195	-0.04077	0.093541	5794	40	0.260589	0.10669	2.28e-06	1.49e-47	0.47466
Metabolics	30690	TC, total cholesterol	0.012416	0.01052	3.89e-05	0.111481	0.205908	-0.0126	0.094375	0.128586	0.171552	0.240264	-0.04736	0.022171	22327	58	5.70383	1.06393	1.88e-36	1.42e-31	0.508423
Metabolics	30740	Glucose	0.013278	0.000349	3.88e-05	0.115608	-0.03738	0.012619	0.097324	0.133893	-0.07408	-0.00068	-0.02455	0.049784	20323	701	4.87301	0.525434	2.24e-34	0.051032	0.532611
	20442	Lifetime number of depressed periods	0.004173	0.006027	6.62e-05	-0.06405	0.158329	-0.01649	-0.09336	-0.03473	0.098089	0.218569	-0.07656	0.043576	8177	672	1.75776	1.15113	2.62e-05	3.08e-07	0.615299
	20433	Age at first episode of depression	0.036633	0.009253	4.51e-05	0.189325	-0.19312	-0.01336	0.162699	0.215952	-0.24793	-0.13832	-0.0679	0.041174	9402	604	36.8158	14.5138	1.24e-42	6.73e-12	0.650726
Metabolics	23568	Cholesterol in Medium HDL	0.005164	0.172321	5.65e-05	0.065847	0.83306	0.013917	0.034606	0.097087	0.770651	0.89547	-0.04938	0.077212	5794	21	0.490327	0.115041	4.96e-05	########	0.680159
Metabolics	23498	Cholesterol in Large VLDL	0.00498	0.065368	4.7e-05	0.068134	-0.50881	0.013377	0.035193	0.101075	-0.57462	-0.44301	-0.05338	0.080133	5794	24	0.093678	0.045552	6.76e-05	4.93e-50	0.701516
Metabolics	30600	Albumin	0.019085	0.018194	2.32e-06	-0.13735	-0.26904	-0.00305	-0.15509	-0.11961	-0.30464	-0.23343	-0.03911	0.033017	20358	53	45.4134	2.4905	9.03e-51	5.21e-49	0.868495

## Sheet: 17. Current_cog_metabolic_phys
Category	dependentVariable	Meaning	age_b	sex_b	dimension_b	age_CI_lower	age_CI_upper	sex_CI_lower	sex_CI_upper	dimension_CI_lower	dimension_CI_upper	age_p	sex_p	dimension_p	n	out	dvMean	dvSD
Metabolics	3063	Forced expiratory volume in 1-second (FEV1)	-0.3147	-1.20554	-0.24509	-0.37783	-0.25156	-1.33653	-1.07456	-0.37789	-0.11229	8.55e-21	2.67e-56	0.000318	796	2	2.69061	0.772517
Cognition	20016	fluid intelligence score (based on # of questions answered correctly in two minutes)	-0.04217	0.045741	-0.25213	-0.12366	0.039315	-0.12367	0.215153	-0.42406	-0.0802	0.309748	0.596022	0.004132	840	9	6.03129	1.94416
Cognition	4282	Maximum number of digits correctly remembered in the reverse order	-0.16044	-0.06143	-0.23299	-0.25916	-0.06172	-0.26584	0.142983	-0.43931	-0.02666	0.001522	0.554828	0.027001	608	43	6.73982	1.06254
Physical Measures	23119	Arm fat percentage (right)	-0.02153	1.16324	0.161191	-0.08901	0.045944	1.02271	1.30377	0.017813	0.304569	0.530961	3.16e-48	0.027639	858	0	30.2611	10.652
Physical Measures	23130	Trunk predicted mass	-0.1077	-1.61913	-0.11988	-0.15793	-0.05748	-1.72373	-1.51454	-0.2266	-0.01316	2.98e-05	########	0.027763	858	0	28.0472	5.85263
Physical Measures	23129	Trunk fat-free mass	-0.10916	-1.60701	-0.12142	-0.16007	-0.05825	-1.71304	-1.50099	-0.22959	-0.01325	2.99e-05	########	0.027884	858	0	29.2514	6.04211
Cognition	6373	Number of puzzles correctly solved in 3 minutes	-0.21025	-0.16866	-0.22991	-0.31198	-0.10851	-0.37926	0.041933	-0.44144	-0.01838	5.96e-05	0.11612	0.03324	588	4	7.76884	2.21943
Physical Measures	23123	Arm fat percentage (left)	-0.01759	1.17678	0.152229	-0.08473	0.049558	1.03695	1.31662	0.00956	0.294897	0.607079	1.7e-49	0.03655	858	0	30.911	10.806
Cognition	23324	Number of symbol digit matches made correctly in 60 seconds	-0.39779	0.105461	-0.18597	-0.48653	-0.30905	-0.07763	0.288556	-0.37084	-0.0011	5.76e-17	0.258051	0.048658	590	2	18.7211	5.43449
Cognition	6348	Duration (in deciseconds) to complete numeric path(trail #1)	0.340606	-0.15113	0.209169	0.240416	0.440797	-0.35971	0.057442	-0.00043	0.418766	9.37e-11	0.154999	0.050466	593	21	220.622	57.6649
Cognition	6350	Duration (in deciseconds) to complete alphanumeric path(trail #2)	0.238622	-0.11944	0.197891	0.141543	0.335701	-0.31869	0.079821	-0.00277	0.398556	2.03e-06	0.239208	0.053234	593	21	531.089	203.145
Metabolics	23482	Total Lipids in Chylomicrons and Extremely Large VLDL	0.063868	-0.68356	0.208405	-0.04081	0.168546	-0.90558	-0.46155	-0.01593	0.432742	0.23084	3.99e-09	0.068524	542	6	0.197297	0.166203
Physical Measures	23111	Leg fat percentage (right)	0.012637	1.63688	0.092711	-0.03452	0.059797	1.53867	1.7351	-0.00749	0.192916	0.598806	########	0.069698	858	0	34.7	10.5544
Physical Measures	23099	Body fat percentage	0.022624	1.16701	0.129681	-0.04453	0.089784	1.02721	1.30681	-0.01296	0.272319	0.508375	7.44e-49	0.074665	857	0	32.9767	8.55245
Physical Measures	23115	Leg fat percentage (left)	0.006844	1.68699	0.084363	-0.03783	0.051512	1.59396	1.78001	-0.01055	0.179276	0.763539	########	0.081368	858	0	34.4539	10.5989
Metabolics	23481	Concentration of Chylomicrons and Extremely Large VLDL Particles	0.075317	-0.67663	0.189316	-0.02861	0.179246	-0.89705	-0.4562	-0.03342	0.412049	0.154888	4.42e-09	0.095446	542	6	1.46e-06	1.25e-06
Metabolics	30600	Albumin	-0.14101	-0.52439	-0.1564	-0.22862	-0.05339	-0.70811	-0.34066	-0.3413	0.028502	0.001668	3.54e-08	0.097149	774	1	45.2692	2.51176
Metabolics	23483	Phospholipids in Chylomicrons and Extremely Large VLDL	0.061913	-0.68601	0.183228	-0.04067	0.164494	-0.90357	-0.46844	-0.03662	0.403073	0.235905	1.76e-09	0.102034	542	6	0.03086	0.026288
Metabolics	23486	Free Cholesterol in Chylomicrons and Extremely Large VLDL	0.043896	-0.63862	0.184744	-0.05953	0.147319	-0.85813	-0.41912	-0.03712	0.406603	0.404288	2.45e-08	0.102338	542	5	0.022089	0.016425
Physical Measures	23127	Trunk fat percentage	0.031541	0.596835	0.139833	-0.04866	0.111739	0.429891	0.763778	-0.0305	0.310163	0.440079	6.94e-12	0.107391	858	1	32.2065	8.07181
Physical Measures	47	Hand grip strength (right)	-0.16378	-1.39791	-0.1041	-0.22571	-0.10185	-1.52687	-1.26894	-0.23517	0.026974	2.93e-07	6.41e-73	0.119314	874	1	29.9622	10.5741
Cognition	20197	Number of word pairs correctly associated	-0.10316	0.52629	-0.15573	-0.20029	-0.00603	0.324943	0.727637	-0.35853	0.047061	0.037435	4.55e-07	0.131857	593	0	6.78752	2.7322
Metabolics	23485	Cholesteryl Esters in Chylomicrons and Extremely Large VLDL	0.034198	-0.66132	0.171287	-0.07044	0.138837	-0.88286	-0.43978	-0.053	0.395571	0.520668	1.1e-08	0.133936	542	5	0.028307	0.020186
Metabolics	23454	Monounsaturated Fatty Acids to Total Fatty Acids percentage	0.008985	-0.56758	0.161115	-0.09406	0.112031	-0.78641	-0.34875	-0.06005	0.382281	0.863883	5.83e-07	0.152756	541	3	23.4782	2.51628
Physical Measures	46	Hand grip strength (left)	-0.17395	-1.43015	-0.08725	-0.23267	-0.11522	-1.5524	-1.30789	-0.2115	0.036994	1.03e-08	2.61e-81	0.168303	876	0	27.9361	10.9163
Metabolics	23555	Cholesteryl Esters in Very Large HDL	-0.06692	0.695786	-0.13905	-0.16708	0.033236	0.485025	0.906547	-0.3542	0.076102	0.18957	3.36e-10	0.204429	542	16	0.055473	0.022909
Metabolics	23501	Triglycerides in Large VLDL	0.088988	-0.47691	0.224341	-0.07439	0.252365	-0.82897	-0.12486	-0.12368	0.572364	0.283159	0.008323	0.204435	232	3	0.15628	0.080311
Metabolics	23487	Triglycerides in Chylomicrons and Extremely Large VLDL	0.038973	-0.61532	0.215815	-0.12926	0.207206	-0.97761	-0.25303	-0.14284	0.574474	0.647423	0.001028	0.23597	232	4	0.125594	0.109385
Metabolics	23562	Cholesteryl Esters in Large HDL	-0.05046	0.729143	-0.12983	-0.15115	0.05022	0.516443	0.941843	-0.34662	0.086957	0.324783	7.62e-11	0.239533	542	12	0.218828	0.118136
Metabolics	23508	Triglycerides in Medium VLDL	0.092929	-0.45051	0.19591	-0.06663	0.252488	-0.79342	-0.1076	-0.14398	0.535803	0.251307	0.010431	0.256217	232	2	0.261136	0.10425
Physical Measures	23104	Body mass index (BMI)	-0.04596	-0.18006	0.102555	-0.13086	0.038948	-0.35713	-0.00299	-0.07777	0.282882	0.288103	0.046272	0.264381	858	9	27.4271	4.97141
Metabolics	23563	Free Cholesterol in Large HDL	-0.02376	0.751911	-0.11372	-0.12208	0.074562	0.544077	0.959744	-0.32555	0.098108	0.634791	7.78e-12	0.291628	542	11	0.06383	0.034023
Metabolics	23489	Total Lipids in Very Large VLDL	0.090644	-0.62433	0.119866	-0.01501	0.196296	-0.84861	-0.40004	-0.10641	0.346139	0.09239	8.93e-08	0.298071	542	4	0.191629	0.119804
Metabolics	23493	Free Cholesterol in Very Large VLDL	0.071302	-0.61048	0.11678	-0.03303	0.175636	-0.8317	-0.38926	-0.10676	0.340324	0.179712	1.14e-07	0.304802	542	2	0.022613	0.013272
Metabolics	23558	Concentration of Large HDL Particles	-0.02163	0.747295	-0.1126	-0.12363	0.080371	0.532004	0.962585	-0.33205	0.106856	0.676759	4.56e-11	0.313484	542	12	0.001328	0.000694
Metabolics	23490	Phospholipids in Very Large VLDL	0.07946	-0.61321	0.114132	-0.02464	0.183563	-0.83428	-0.39214	-0.1089	0.337161	0.134153	9.86e-08	0.314767	542	3	0.036487	0.023599
Metabolics	23488	Concentration of Very Large VLDL Particles	0.091383	-0.63439	0.113536	-0.01261	0.19538	-0.85523	-0.41354	-0.10927	0.336339	0.08481	3.59e-08	0.3168	542	3	3.29e-06	2.06e-06
Lifestyle Factors	2139	Age first had sexual intercourse	0.121464	-0.0698	-0.08824	0.036891	0.206037	-0.24536	0.105749	-0.26532	0.088843	0.004963	0.435071	0.328082	909	39	18.2368	2.88227
Metabolics	23484	Cholesterol in Chylomicrons and Extremely Large VLDL	0.013868	-0.4747	0.16722	-0.1448	0.172539	-0.81702	-0.13238	-0.17127	0.50571	0.862964	0.006947	0.330144	232	3	0.053401	0.037388
Metabolics	30270	Mean cell volume (MCV)	0.185301	-0.1219	-0.28995	-0.07929	0.449895	-0.67218	0.428374	-0.88953	0.309624	0.166676	0.659651	0.337719	122	0	90.1613	6.10043
Metabolics	23472	Pyruvate	-0.00498	0.128907	0.111129	-0.11292	0.102955	-0.09957	0.357383	-0.11975	0.342007	0.927704	0.26779	0.344329	540	5	0.079642	0.02507
Metabolics	23551	Concentration of Very Large HDL Particles	-0.05957	0.672616	-0.10123	-0.15926	0.04013	0.463003	0.882228	-0.31527	0.112799	0.240625	9.63e-10	0.352722	542	17	0.000219	7.64e-05
Metabolics	23559	Total Lipids in Large HDL	-0.02192	0.75594	-0.09974	-0.12251	0.078679	0.543418	0.968463	-0.31637	0.116889	0.668427	1.62e-11	0.365657	542	11	0.620675	0.296409
Metabolics	23453	Polyunsaturated Fatty Acids to Total Fatty Acids percentage	-0.09282	0.458639	-0.10019	-0.19938	0.013745	0.232787	0.684492	-0.32838	0.128002	0.087555	8.07e-05	0.388298	541	4	42.7901	3.47484
Metabolics	23494	Triglycerides in Very Large VLDL	0.035304	-0.46045	0.158876	-0.13533	0.205937	-0.82862	-0.09228	-0.20439	0.522145	0.682936	0.014646	0.388453	232	2	0.104486	0.072886
Metabolics	23495	Concentration of Large VLDL Particles	0.094281	-0.62952	0.097735	-0.00966	0.198223	-0.8499	-0.40913	-0.12497	0.320438	0.075279	4.23e-08	0.388531	542	2	9.93e-06	5.18e-06
Metabolics	23497	Phospholipids in Large VLDL	0.086388	-0.63189	0.096637	-0.01766	0.190441	-0.85251	-0.41127	-0.1263	0.319578	0.103359	3.9e-08	0.394381	542	2	0.064222	0.037011
Metabolics	23496	Total Lipids in Large VLDL	0.097894	-0.61431	0.096149	-0.00635	0.202134	-0.83533	-0.39329	-0.12719	0.319491	0.065578	9.3e-08	0.397619	542	2	0.32204	0.16635
Metabolics	23569	Cholesteryl Esters in Medium HDL	0.020301	0.644876	-0.09453	-0.08297	0.123574	0.425379	0.864374	-0.3167	0.127642	0.699175	1.8e-08	0.403147	542	3	0.405303	0.099377
Metabolics	23500	Free Cholesterol in Large VLDL	0.088958	-0.63085	0.093159	-0.01447	0.19239	-0.85015	-0.41154	-0.12845	0.314769	0.091594	3.43e-08	0.4088	542	2	0.045241	0.023412
Metabolics	23456	Linoleic Acid to Total Fatty Acids percentage	-0.1794	0.22352	-0.09782	-0.2888	-0.07	-0.00798	0.455017	-0.33176	0.136116	0.001387	0.058382	0.411266	541	4	29.6467	3.33738
Metabolics	23565	Concentration of Medium HDL Particles	0.046995	0.615452	-0.09167	-0.05521	0.149198	0.398229	0.832675	-0.31153	0.128199	0.366297	5.36e-08	0.412655	542	3	0.003813	0.000938
Metabolics	23473	Citrate	0.092936	0.190675	0.093155	-0.01129	0.19716	-0.02978	0.411135	-0.13031	0.31662	0.080326	0.089792	0.412708	541	2	0.064767	0.012219
Metabolics	23561	Cholesterol in Large HDL	-0.01528	0.545921	-0.14407	-0.17922	0.148658	0.19509	0.896751	-0.49206	0.203916	0.853923	0.002548	0.414129	232	6	0.269954	0.149388
Metabolics	23554	Cholesterol in Very Large HDL	-0.05231	0.604334	-0.13396	-0.20745	0.102824	0.273166	0.935501	-0.46283	0.194916	0.505733	0.00044	0.421669	232	7	0.077546	0.02875
Metabolics	23560	Phospholipids in Large HDL	-0.01367	0.764006	-0.08606	-0.11385	0.08652	0.552352	0.975661	-0.30181	0.129684	0.788572	8.55e-12	0.433098	542	11	0.308869	0.140906
Physical Measures	23116	Leg fat mass (left)	-0.0832	1.03408	0.060526	-0.15776	-0.00864	0.878522	1.18964	-0.09814	0.219194	0.028806	8.47e-34	0.45394	858	11	4.52267	1.87624
Metabolics	23447	Monounsaturated Fatty Acids	0.107245	-0.36566	0.085758	0.001403	0.213086	-0.58974	-0.14158	-0.14109	0.312604	0.047057	0.001463	0.457511	541	8	2.77241	0.697165
Metabolics	23524	Total Lipids in IDL	0.12032	0.393465	-0.0874	0.012053	0.228586	0.164178	0.622752	-0.31911	0.144302	0.029511	0.000827	0.45852	542	2	1.23645	0.276618
Physical Measures	23112	Leg fat mass (right)	-0.07227	1.00602	0.058667	-0.14744	0.002895	0.849138	1.16291	-0.10122	0.218556	0.059464	7.73e-32	0.471315	858	12	4.59433	1.88805
Depression	20127	Neuroticism score	-0.09869	0.138097	0.068102	-0.18895	-0.00842	-0.05067	0.326866	-0.12297	0.259175	0.032195	0.151209	0.483999	746	0	6.66086	3.44218
Metabolics	23552	Total Lipids in Very Large HDL	-0.08167	0.750432	-0.07352	-0.18087	0.017538	0.541859	0.959006	-0.28653	0.139481	0.106287	1e-11	0.49751	542	16	0.157699	0.064832
Metabolics	23528	Free Cholesterol in IDL	0.112323	0.372366	-0.07922	0.003208	0.221439	0.141281	0.603452	-0.31275	0.154298	0.043674	0.001673	0.504929	542	2	0.220579	0.054095
Metabolics	30180	Lymphocyte ratio	-0.099	-0.2558	0.171833	-0.33359	0.135586	-0.74677	0.235169	-0.36464	0.708305	0.402965	0.30246	0.525169	131	1	26.7381	7.9853
Metabolics	23527	Cholesteryl Esters in IDL	0.103961	0.442945	-0.0739	-0.00335	0.211269	0.215687	0.670202	-0.30355	0.155755	0.057538	0.000152	0.527104	542	2	0.624783	0.153576
Metabolics	23492	Cholesteryl Esters in Very Large VLDL	0.061163	-0.5336	0.070258	-0.043	0.165328	-0.75409	-0.31312	-0.15291	0.293425	0.248843	2.94e-06	0.536076	542	0	0.029888	0.014195
Metabolics	23491	Cholesterol in Very Large VLDL	0.02664	-0.3717	0.10746	-0.13543	0.188713	-0.72048	-0.02292	-0.2376	0.452516	0.745551	0.036917	0.53887	232	1	0.052655	0.026563
Metabolics	23553	Phospholipids in Very Large HDL	-0.086	0.769741	-0.06616	-0.18505	0.013041	0.561506	0.977976	-0.27881	0.146504	0.088526	2.98e-12	0.540894	542	16	0.072872	0.03648
Metabolics	30690	TC, total cholesterol	0.129165	0.167095	-0.05691	0.042349	0.215981	-0.0143	0.348488	-0.23982	0.125998	0.003622	0.070919	0.541269	851	1	5.72783	1.08587
Metabolics	23526	Cholesterol in IDL	0.100958	0.445935	0.102744	-0.06158	0.263497	0.096126	0.795745	-0.24333	0.44882	0.22134	0.012878	0.557967	232	1	0.820544	0.211572
Depression	20434	Age at last episode of depression	0.453056	0.032485	0.067113	0.343584	0.562528	-0.20179	0.266764	-0.16532	0.299545	1.48e-14	0.785051	0.570155	521	61	53.5283	10.4158
Depression	4620	Number of depression episodes	-0.12235	0.107643	0.052735	-0.21477	-0.02994	-0.08569	0.300972	-0.14199	0.247456	0.009591	0.274362	0.594747	721	54	2.68966	5.04347
Metabolics	23570	Free Cholesterol in Medium HDL	0.038704	0.638265	-0.05806	-0.06301	0.140421	0.422526	0.854005	-0.27718	0.161066	0.454615	1.45e-08	0.602508	542	5	0.085732	0.024702
Metabolics	23498	Cholesterol in Large VLDL	0.045267	-0.32352	0.084275	-0.11309	0.203628	-0.66417	0.017124	-0.25274	0.421286	0.572678	0.062491	0.621612	232	0	0.095987	0.045609
Depression	4609	Longest period of depression	-0.13752	-0.05375	-0.04728	-0.23504	-0.03999	-0.2551	0.147596	-0.25006	0.155507	0.005827	0.600006	0.646972	721	53	11.738	16.3589
Metabolics	23556	Free Cholesterol in Very Large HDL	-0.08022	0.65394	-0.04845	-0.17724	0.016801	0.449769	0.858111	-0.25696	0.160054	0.104767	1.03e-09	0.647787	542	15	0.022616	0.005869
Metabolics	30610	Alkaline phosphatase (ALP)	0.217212	-0.10504	-0.0394	0.134087	0.300337	-0.27889	0.068814	-0.21482	0.13602	4.08e-07	0.235768	0.659198	851	5	79.8239	21.6261
Metabolics	30750	Glycated haemoglobin (HbA1c)	0.265535	-0.35397	0.041318	0.177522	0.353548	-0.53964	-0.16829	-0.14558	0.228214	5.89e-09	0.000202	0.664189	839	29	34.5705	3.88223
Metabolics	23499	Cholesteryl Esters in Large VLDL	0.082331	-0.47142	0.045319	-0.02336	0.188019	-0.69513	-0.24771	-0.18111	0.27175	0.126353	4.36e-05	0.693995	542	0	0.050915	0.022927
Metabolics	23452	Omega-6 Fatty Acids to Total Fatty Acids percentage	-0.19372	0.343719	-0.04563	-0.30087	-0.08656	0.116048	0.57139	-0.27493	0.18367	0.000434	0.003205	0.695658	541	5	38.6255	3.37309
Metabolics	30000	White blood cell (leukocyte) count	0.079437	0.136533	0.102422	-0.15542	0.3143	-0.35514	0.628207	-0.43072	0.635565	0.502165	0.581457	0.702768	131	4	7.23323	1.63548
Physical Measures	23120	Arm fat mass (right)	-0.06361	0.388432	0.029632	-0.14819	0.020977	0.212096	0.564769	-0.14968	0.208946	0.140178	1.82e-05	0.745562	858	25	1.22593	0.580678
Depression	20442	Lifetime number of depressed periods	-0.13619	0.475324	-0.04836	-0.27893	0.006552	0.160877	0.789771	-0.35319	0.256471	0.061331	0.003301	0.754328	289	39	2.34	1.59328
Metabolics	23568	Cholesterol in Medium HDL	0.031302	0.515742	0.04454	-0.13257	0.19517	0.163489	0.867995	-0.30405	0.393133	0.706086	0.004433	0.800817	232	2	0.469225	0.119714
Metabolics	23510	Total Lipids in Small VLDL	0.122577	-0.41057	0.028175	0.016431	0.228724	-0.63562	-0.18553	-0.19967	0.25602	0.023757	0.000384	0.807926	542	1	0.408801	0.126842
Metabolics	23509	Concentration of Small VLDL Particles	0.121533	-0.4467	0.027068	0.016135	0.226931	-0.67016	-0.22324	-0.19917	0.253306	0.023963	0.000103	0.814047	542	1	3.9e-05	1.25e-05
Lifestyle Factors	2149	Lifetime number of sexual partners	-0.29331	-0.22779	-0.02034	-0.37553	-0.2111	-0.40022	-0.05535	-0.19336	0.152675	7.69e-12	0.009725	0.817421	909	62	5.72609	5.00714
Metabolics	23503	Total Lipids in Medium VLDL	0.100262	-0.39516	0.026171	-0.00643	0.206959	-0.621	-0.16932	-0.20242	0.254762	0.065414	0.000654	0.821924	542	0	0.575591	0.199825
Metabolics	23529	Triglycerides in IDL	0.120283	-0.16088	-0.03587	-0.03496	0.275524	-0.49468	0.172926	-0.36682	0.295089	0.127722	0.342068	0.83055	232	3	0.095556	0.024177
Metabolics	23571	Triglycerides in Medium HDL	0.142202	-0.15631	-0.03626	-0.01601	0.300409	-0.49823	0.185615	-0.37476	0.302233	0.07769	0.367368	0.832446	232	6	0.049877	0.016366
Metabolics	23522	Triglycerides in Very Small VLDL	0.115277	-0.27026	-0.03529	-0.04316	0.273711	-0.61093	0.070412	-0.37305	0.302473	0.1524	0.118953	0.836554	232	3	0.065933	0.019943
Depression	20438	Duration of worst depression	-0.02355	0.077278	0.020652	-0.13392	0.08682	-0.16306	0.317619	-0.21679	0.258095	0.674857	0.52738	0.864213	521	15	3.95652	1.6537
Metabolics	30710	C-reactive protein (CRP)	0.101788	0.110223	-0.01255	0.016215	0.187361	-0.06801	0.288451	-0.19203	0.166937	0.019839	0.224883	0.890798	849	55	1.68869	1.53027
Physical Measures	23124	Arm fat mass (left)	-0.06088	0.3929	0.010997	-0.14546	0.023702	0.216562	0.569239	-0.16832	0.190313	0.157936	1.46e-05	0.904136	858	25	1.29388	0.635998
Metabolics	4080	Systolic blood pressure, automated reading	0.333968	-0.08433	-0.00907	0.2465	0.421437	-0.26531	0.096647	-0.19361	0.175466	3.66e-13	0.360226	0.923069	722	3	136.467	18.4019
Metabolics	23515	Triglycerides in Small VLDL	0.08277	-0.38137	0.016499	-0.08061	0.246151	-0.73296	-0.02977	-0.33134	0.364339	0.318055	0.033739	0.925375	232	1	0.150938	0.058069
Metabolics	23578	Triglycerides in Small HDL	0.058752	-0.38411	0.012527	-0.10467	0.222172	-0.73672	-0.03151	-0.33539	0.36044	0.478154	0.032996	0.943313	232	2	0.050609	0.016904
Metabolics	30740	Glucose	0.130952	0.079911	-0.00427	0.039774	0.222131	-0.11302	0.272844	-0.19722	0.188683	0.004981	0.416035	0.965331	770	35	4.86781	0.556485
Depression	20433	Age at first episode of depression	0.25321	-0.29137	0.000941	0.143961	0.362458	-0.53107	-0.05167	-0.2304	0.232281	7.67e-06	0.017386	0.993616	521	64	32.5142	15.7652

## Sheet: 18. cog_metabolic_phys_Summary2
UKB group	Category	Code	Meaning	Dimension_p	Dimension Effect Size	Dimension Beta		Specific Category	age	sex	Dimension	age_b	sex_b	Dimension_b	age_CI_lower	age_CI_upper	sex_CI_lower	sex_CI_upper	Dimension_CI_lower	Dimension_CI_upper	n	out	dvMean	dvSD	age_p_corrected	sex_p_corrected	Dimension_p_corrected
general population	Cognition	6348	Duration (in deciseconds) to complete numeric path(trail #1)		0.006686	0.15481	D2>D1
general population	Cognition	6350	Duration (in deciseconds) to complete alphanumeric path(trail #2)		0.003876	0.123866	D2>D1
general population	Cognition	20016	fluid intelligence score (based on # of questions answered correctly in two minutes)		0.015846	-0.25556	D1>D2
general population	Cognition	4282	Maximum number of digits correctly remembered in the reverse order		0.008485	-0.18397	D1>D2
general population	Cognition	23324	Number of symbol digit matches made correctly		0.00536	-0.13473	D1>D2
general population	Cognition	20197	Number of word pairs correctly associated		0.000874	-0.05819	D1>D2
general population	Cognition	6373	Number of puzzles correctly solved in 3 minutes		0.016375	-0.25139	D1>D2
general population	Metabolics	3063	Forced expiratory volume in 1-second (FEV1)	1.66e-61	0.02253	-0.21849	D1>D2	Biomarkers included in Klemera-Doubal method biological age (KDM-BA) algorithm	0.202127	0.44902	0.02253	-0.35739	-1.28383	-0.21849	-0.36992	-0.34485	-1.30894	-1.25871	-0.2439	-0.19307	21133	44	2.75098	0.735932	0	0	1.66e-61
general population	Metabolics	4080	Systolic blood pressure, automated reading	0.001811	0.001059	0.06206	D2>D1	Biomarkers included in Klemera-Doubal method biological age (KDM-BA) algorithm	0.095969	0.019407	0.001059	0.305746	-0.26453	0.06206	0.288291	0.3232	-0.29951	-0.22956	0.026604	0.097515	19055	79	139.657	19.0764	########	4.58e-49	0.001811
general population	Metabolics	30750	Glycated haemoglobin (HbA1c)	0.002983	0.00085	0.057514	D2>D1	Biomarkers included in Klemera-Doubal method biological age (KDM-BA) algorithm	0.072329	0.00028	0.00085	0.271282	-0.03263	0.057514	0.254287	0.288276	-0.06676	0.001497	0.023021	0.092008	22080	508	34.4867	3.5631	########	0.066288	0.002983
general population	Metabolics	30000	White blood cell (leukocyte) count	0.000455	0.008094	0.185747	D2>D1	Biomarkers included in PhenoAge algorithm	0.004061	0.00213	0.008094	0.064112	-0.09257	0.185747	0.018092	0.110132	-0.18442	-0.00072	0.0915	0.279995	3056	28	6.70503	1.59402	0.007064	0.053044	0.000455
general population	Metabolics	30270	Mean cell volume (MCV)	7.4e-05	0.010798	-0.21321	D1>D2	Biomarkers included in PhenoAge algorithm	0.021269	4.61e-05	0.010798	0.147844	-0.01356	-0.21321	0.100511	0.195177	-0.10775	0.080633	-0.30952	-0.1169	2879	14	91.1984	5.39993	2.08e-09	0.77774	7.4e-05
general population	Metabolics	30710	C-reactive protein (CRP)	7.4e-05	0.001541	0.080003	D2>D1	Common biomarkers included in KDM-BA algorithm and PhenoAge algorithm	0.007421	0.000437	0.001541	0.086743	0.042121	0.080003	0.068953	0.104533	0.006402	0.07784	0.04389	0.116116	22282	1298	1.37109	1.17646	5.26e-21	0.023424	7.4e-05
general population	Metabolics	23447	Monounsaturated Fatty Acids	2.33e-05	0.002524	0.10159	D2>D1	Fatty Acids	0.00867	0.011795	0.002524	0.093079	-0.21771	0.10159	0.071813	0.114345	-0.26029	-0.17513	0.058435	0.144745	14592	171	2.76692	0.716815	2.92e-17	2.16e-23	2.33e-05
general population	Metabolics	23452	Omega-6 Fatty Acids to Total Fatty Acids percentage	0.00121	0.001508	-0.07723	D1>D2	Fatty Acids	0.019909	0.031577	0.001508	-0.13951	0.354026	-0.07723	-0.16037	-0.11864	0.312228	0.395824	-0.1196	-0.03486	14592	96	38.4371	3.28637	3.85e-38	1.06e-60	0.00121
general population	Metabolics	23453	Polyunsaturated Fatty Acids to Total Fatty Acids percentage	0.00082	0.001603	-0.07969	D1>D2	Fatty Acids	0.00227	0.04872	0.001603	-0.04675	0.444138	-0.07969	-0.06765	-0.02585	0.402288	0.485989	-0.12211	-0.03728	14592	102	42.8864	3.38695	1.71e-05	1.79e-93	0.00082
general population	Metabolics	23454	Monounsaturated Fatty Acids to Total Fatty Acids percentage	2.23e-05	0.002527	0.098325	D2>D1	Fatty Acids	6.55e-05	0.081061	0.002527	0.007788	-0.57233	0.098325	-0.01269	0.028265	-0.61334	-0.53132	0.056754	0.139896	14592	43	23.2661	2.49726	0.460631	########	2.23e-05
general population	Metabolics	23456	Linoleic Acid to Total Fatty Acids percentage	0.001811	0.001387	-0.0748	D1>D2	Fatty Acids	0.015832	0.021565	0.001387	-0.12541	0.294001	-0.0748	-0.14647	-0.10436	0.251838	0.336164	-0.11753	-0.03208	14592	57	29.4428	3.17439	1.18e-30	6.25e-42	0.001811
general population	Metabolics	23481	Concentration of Chylomicrons and Extremely Large VLDL Particles	0.002752	0.001294	0.06989	D2>D1	Lipoprotein subclasses	0.001388	0.080759	0.001294	0.035677	-0.56798	0.06989	0.015207	0.056147	-0.60897	-0.527	0.028366	0.111413	14608	202	1.42e-06	1.26e-06	0.00077	########	0.002752
general population	Metabolics	23482	Total Lipids in Chylomicrons and Extremely Large VLDL	0.001958	0.001376	0.072208	D2>D1	Lipoprotein subclasses	0.000673	0.081962	0.001376	0.024886	-0.5737	0.072208	0.00438	0.045391	-0.61476	-0.53263	0.030599	0.113816	14608	202	0.191351	0.168457	0.01912	########	0.001958
general population	Metabolics	23483	Phospholipids in Chylomicrons and Extremely Large VLDL	0.001283	0.001496	0.074877	D2>D1	Lipoprotein subclasses	0.001074	0.082668	0.001496	0.031261	-0.57323	0.074877	0.010877	0.051645	-0.61405	-0.53241	0.03352	0.116234	14608	183	0.029984	0.026684	0.003054	########	0.001283
general population	Metabolics	23484	Cholesterol in Chylomicrons and Extremely Large VLDL	0.025837	0.001882	0.083895	D2>D1	Lipoprotein subclasses	0.001241	0.077738	0.001882	0.033604	-0.5532	0.083895	0.000887	0.066321	-0.6186	-0.48781	0.017583	0.150207	5794	56	0.051221	0.038076	0.046453	3.74e-59	0.025837
general population	Metabolics	23485	Cholesteryl Esters in Chylomicrons and Extremely Large VLDL	0.004597	0.001162	0.06634	D2>D1	Lipoprotein subclasses	0.000315	0.082421	0.001162	0.017006	-0.57519	0.06634	-0.00343	0.037443	-0.61613	-0.53426	0.024859	0.107821	14608	129	0.027537	0.020926	0.106093	########	0.004597
general population	Metabolics	23486	Free Cholesterol in Chylomicrons and Extremely Large VLDL	0.001516	0.001449	0.073976	D2>D1	Lipoprotein subclasses	0.001321	0.074783	0.001449	0.034813	-0.54494	0.073976	0.014372	0.055254	-0.58587	-0.504	0.032496	0.115455	14608	157	0.021577	0.016621	0.000998	########	0.001516
general population	Metabolics	23487	Triglycerides in Chylomicrons and Extremely Large VLDL	0.020606	0.002079	0.089535	D2>D1	Lipoprotein subclasses	0.001346	0.077189	0.002079	0.035596	-0.55964	0.089535	0.002217	0.068976	-0.62626	-0.49303	0.022014	0.157057	5794	98	0.118886	0.106725	0.039401	2.18e-58	0.020606
general population	Metabolics	23488	Concentration of Very Large VLDL Particles	0.018196	0.00083	0.055466	D2>D1	Lipoprotein subclasses	0.002318	0.094897	0.00083	0.045698	-0.61489	0.055466	0.025475	0.065922	-0.6554	-0.57439	0.014422	0.09651	14608	120	3.24e-06	2.1e-06	1.43e-05	########	0.018196
general population	Metabolics	23489	Total Lipids in Very Large VLDL	0.016124	0.000861	0.056652	D2>D1	Lipoprotein subclasses	0.002141	0.092327	0.000861	0.044037	-0.60733	0.056652	0.023751	0.064322	-0.64796	-0.5667	0.015481	0.097824	14608	130	0.189142	0.123033	2.9e-05	########	0.016124
general population	Metabolics	23490	Phospholipids in Very Large VLDL	0.021459	0.000781	0.053933	D2>D1	Lipoprotein subclasses	0.002011	0.089243	0.000781	0.042675	-0.59596	0.053933	0.022406	0.062943	-0.63655	-0.55537	0.012795	0.09507	14608	106	0.03572	0.024097	4.96e-05	########	0.021459
general population	Metabolics	23493	Free Cholesterol in Very Large VLDL	0.025837	0.000723	0.05214	D2>D1	Lipoprotein subclasses	0.002246	0.082519	0.000723	0.045321	-0.57372	0.05214	0.024967	0.065675	-0.61448	-0.53296	0.010827	0.093454	14608	92	0.022119	0.01345	1.85e-05	########	0.025837
general population	Metabolics	23494	Triglycerides in Very Large VLDL	0.048666	0.001469	0.074478	D2>D1	Lipoprotein subclasses	0.00357	0.087575	0.001469	0.057365	-0.59317	0.074478	0.024467	0.090263	-0.65889	-0.52745	0.007834	0.141123	5794	63	0.100895	0.071456	0.00077	1.01e-66	0.048666
general population	Metabolics	23495	Concentration of Large VLDL Particles	0.015786	0.000869	0.056989	D2>D1	Lipoprotein subclasses	0.002654	0.089175	0.000869	0.049103	-0.59658	0.056989	0.028814	0.069392	-0.63721	-0.55594	0.0158	0.098178	14608	100	9.81e-06	5.27e-06	3.4e-06	########	0.015786
general population	Metabolics	23496	Total Lipids in Large VLDL	0.023968	0.000748	0.052878	D2>D1	Lipoprotein subclasses	0.002371	0.087774	0.000748	0.046396	-0.5913	0.052878	0.026112	0.06668	-0.63194	-0.55067	0.011692	0.094063	14608	97	0.318679	0.169401	1.13e-05	########	0.023968
general population	Metabolics	23497	Phospholipids in Large VLDL	0.022622	0.000764	0.053222	D2>D1	Lipoprotein subclasses	0.002184	0.093649	0.000764	0.044356	-0.61058	0.053222	0.024162	0.064551	-0.65104	-0.57012	0.012217	0.094227	14608	79	0.063164	0.03776	2.38e-05	########	0.022622
general population	Metabolics	23500	Free Cholesterol in Large VLDL	0.025837	0.000719	0.051647	D2>D1	Lipoprotein subclasses	0.002402	0.092092	0.000719	0.046542	-0.60514	0.051647	0.026345	0.066738	-0.64559	-0.56468	0.010641	0.092652	14608	70	0.044597	0.024026	9.82e-06	########	0.025837
general population	Metabolics	23526	Cholesterol in IDL	0.011825	0.002409	-0.09675	D1>D2	Lipoprotein subclasses	0.010717	0.051245	0.002409	0.101143	0.451144	-0.09675	0.067925	0.134361	0.384788	0.517499	-0.16404	-0.02945	5794	18	0.841575	0.197173	4.76e-09	2.26e-39	0.011825
general population	Metabolics	23527	Cholesteryl Esters in IDL	0.040848	0.000604	-0.04868	D1>D2	Lipoprotein subclasses	0.006799	0.049552	0.000604	0.080762	0.446331	-0.04868	0.060004	0.101521	0.40476	0.487903	-0.0908	-0.00656	14608	41	0.627071	0.148127	6.3e-14	1.39e-95	0.040848
general population	Metabolics	23551	Concentration of Very Large HDL Particles	0.000609	0.001695	-0.07423	D1>D2	Lipoprotein subclasses	0.006011	0.194414	0.001695	0.069044	0.873158	-0.07423	0.050057	0.08803	0.835149	0.911166	-0.11276	-0.0357	14608	227	0.000232	8.63e-05	2.32e-12	0	0.000609
general population	Metabolics	23552	Total Lipids in Very Large HDL	0.000302	0.001887	-0.07789	D1>D2	Lipoprotein subclasses	0.004051	0.204794	0.001887	0.056312	0.896977	-0.07789	0.037446	0.075177	0.859212	0.934742	-0.11617	-0.03961	14608	206	0.167589	0.073531	8.79e-09	0	0.000302
general population	Metabolics	23553	Phospholipids in Very Large HDL	0.000455	0.001765	-0.07518	D1>D2	Lipoprotein subclasses	0.004197	0.20762	0.001765	0.057188	0.902855	-0.07518	0.038375	0.076002	0.865184	0.940525	-0.11337	-0.03699	14608	191	0.078534	0.041654	4.76e-09	0	0.000455
general population	Metabolics	23554	Cholesterol in Very Large HDL	0.029672	0.001776	-0.07569	D1>D2	Lipoprotein subclasses	0.002755	0.192249	0.001776	0.046587	0.863085	-0.07569	0.016118	0.077055	0.802268	0.923903	-0.13738	-0.01401	5794	77	0.083395	0.031815	0.003117	########	0.029672
general population	Metabolics	23555	Cholesteryl Esters in Very Large HDL	0.000445	0.001787	-0.0757	D1>D2	Lipoprotein subclasses	0.002891	0.206247	0.001787	0.04747	0.899798	-0.0757	0.028647	0.066292	0.862109	0.937487	-0.1139	-0.0375	14608	185	0.059117	0.025848	1.31e-06	0	0.000445
general population	Metabolics	23556	Free Cholesterol in Very Large HDL	8.35e-06	0.002809	-0.09776	D1>D2	Lipoprotein subclasses	0.002315	0.153347	0.002809	0.043725	0.773457	-0.09776	0.024303	0.063148	0.734573	0.812342	-0.13718	-0.05835	14608	238	0.023211	0.006516	1.53e-05	########	8.35e-06
general population	Metabolics	23558	Concentration of Large HDL Particles	0.038478	0.00062	-0.04408	D1>D2	Lipoprotein subclasses	0.005906	0.236639	0.00062	0.067207	0.971868	-0.04408	0.048652	0.085763	0.934722	1.00901	-0.08173	-0.00643	14608	91	0.001446	0.000753	2.73e-12	0	0.038478
general population	Metabolics	23562	Cholesteryl Esters in Large HDL	0.028562	0.000693	-0.04669	D1>D2	Lipoprotein subclasses	0.002811	0.228617	0.000693	0.046387	0.952269	-0.04669	0.027797	0.064977	0.915047	0.989491	-0.08443	-0.00896	14608	83	0.238022	0.128568	1.68e-06	0	0.028562
general population	Metabolics	23563	Free Cholesterol in Large HDL	0.030992	0.000669	-0.04563	D1>D2	Lipoprotein subclasses	0.005886	0.239106	0.000669	0.066857	0.975051	-0.04563	0.048357	0.085358	0.938014	1.01209	-0.08317	-0.00809	14608	106	0.068984	0.036611	2.99e-12	0	0.030992
general population	Metabolics	23472	Pyruvate	0.020966	0.000795	0.05719	D2>D1	Glycolysis related metabolites	5.79e-05	0.003781	0.000795	-0.0076	0.123233	0.05719	-0.02895	0.013757	0.080465	0.166002	0.01383	0.10055	14573	165	0.078259	0.024816	0.485515	2e-08	0.020966
general population	Neuroticism Sum Score	20127	Neuroticism score		0.000825	0.057402	D2>D1
general population	PhysicalMeasures	23111	Leg fat percentage (right)	6.7e-08	0.002517	0.051536	D2>D1		0.005828	0.744817	0.002517	0.038665	1.73146	0.051536	0.030047	0.047282	1.71416	1.74875	0.034027	0.069044	22581	0	32.0118	10.531	4.56e-18	0	6.7e-08
general population	PhysicalMeasures	23115	Leg fat percentage (left)	3.15e-07	0.002278	0.046341	D2>D1		0.005444	0.771796	0.002278	0.035317	1.76194	0.046341	0.027171	0.043464	1.74559	1.77829	0.02979	0.062892	22581	0	31.8499	10.5267	5.43e-17	0	3.15e-07
general population	PhysicalMeasures	47	Hand grip strength (right)	2.01e-24	0.00814	-0.12524	D1>D2		0.08463	0.531364	0.00814	-0.20718	-1.45423	-0.12524	-0.21871	-0.19564	-1.47735	-1.43111	-0.14864	-0.10183	23010	35	31.3838	10.418	########	0	2.01e-24
general population	PhysicalMeasures	23099	Body fat percentage	0.000655	0.001064	0.049934	D2>D1		0.005946	0.429952	0.001064	0.058243	1.31252	0.049934	0.04539	0.071095	1.28673	1.33831	0.023823	0.076045	22574	0	30.8891	8.13926	2.21e-18	0	0.000655
general population	PhysicalMeasures	23123	Arm fat percentage (left)	7.4e-05	0.001435	0.058524	D2>D1		0.001032	0.422878	0.001435	0.024431	1.30563	0.058524	0.011456	0.037407	1.27959	1.33167	0.032162	0.084885	22581	21	28.3239	9.56694	0.000281	0	7.4e-05
general population	PhysicalMeasures	46	Hand grip strength (left)	3.19e-21	0.007038	-0.11522	D1>D2		0.08903	0.53682	0.007038	-0.21088	-1.4556	-0.11522	-0.2223	-0.19946	-1.47849	-1.43271	-0.13839	-0.09205	23007	25	29.141	10.4057	########	0	3.19e-21
general population	PhysicalMeasures	23119	Arm fat percentage (right)	1.19e-05	0.001728	0.064883	D2>D1		0.001671	0.411241	0.001728	0.031404	1.28736	0.064883	0.018297	0.04451	1.26106	1.31367	0.038254	0.091512	22581	28	27.6468	9.33948	4.2e-06	0	1.19e-05
general population	PhysicalMeasures	23129	Trunk fat-free mass	########	0.037095	-0.20733	D1>D2		0.038882	0.726231	0.037095	-0.10457	-1.69952	-0.20733	-0.11345	-0.0957	-1.71732	-1.68171	-0.22536	-0.18931	22581	1	29.5247	5.88789	########	0	########
general population	PhysicalMeasures	23130	Trunk predicted mass	########	0.036942	-0.20406	D1>D2		0.038675	0.733765	0.036942	-0.10286	-1.70867	-0.20406	-0.11162	-0.09411	-1.72624	-1.69111	-0.22185	-0.18628	22579	2	28.3248	5.71127	########	0	########
general population	LifeStyle Factor	2139	Age first had sexual intercourse		0.001183	-0.06888	D1>D2
general population	LifeStyle Factor	2149	Lifetime number of sexual partners		0.000617	-0.04999	D1>D2
current MDE	Metabolics	3063	Forced expiratory volume in 1-second (FEV1)		0.000318	-0.24509	D1>D2					-0.3147	-1.20554	-0.24509	-0.37783	-0.25156	-1.33653	-1.07456	-0.37789	-0.11229	796	2	2.69061	0.772517	8.55e-21	2.67e-56	0.000318
current MDE	Cognition	20016	fluid intelligence score (based on # of questions answered correctly in two minutes)		0.004132	-0.25213	D1>D2					-0.04217	0.045741	-0.25213	-0.12366	0.039315	-0.12367	0.215153	-0.42406	-0.0802	840	9	6.03129	1.94416	0.309748	0.596022	0.004132
current MDE	Cognition	4282	Maximum number of digits correctly remembered in the reverse order		0.027001	-0.23299	D1>D2					-0.16044	-0.06143	-0.23299	-0.25916	-0.06172	-0.26584	0.142983	-0.43931	-0.02666	608	43	6.73982	1.06254	0.001522	0.554828	0.027001
current MDE	Cognition	6373	Number of puzzles correctly solved in 3 minutes		0.027639	-0.22991	D1>D2					-0.02153	1.16324	0.161191	-0.08901	0.045944	1.02271	1.30377	0.017813	0.304569	858	0	30.2611	10.652	0.530961	3.16e-48	0.027639
current MDE	Cognition	23324	Number of symbol digit matches made correctly in 60 seconds		0.027763	-0.18597	D1>D2					-0.1077	-1.61913	-0.11988	-0.15793	-0.05748	-1.72373	-1.51454	-0.2266	-0.01316	858	0	28.0472	5.85263	2.98e-05	########	0.027763
current MDE	Physical Measures	23119	Arm fat percentage (right)		0.027884	0.161191	D2>D1					-0.10916	-1.60701	-0.12142	-0.16007	-0.05825	-1.71304	-1.50099	-0.22959	-0.01325	858	0	29.2514	6.04211	2.99e-05	########	0.027884
current MDE	Physical Measures	23130	Trunk predicted mass		0.03324	-0.11988	D1>D2					-0.21025	-0.16866	-0.22991	-0.31198	-0.10851	-0.37926	0.041933	-0.44144	-0.01838	588	4	7.76884	2.21943	5.96e-05	0.11612	0.03324
current MDE	Physical Measures	23129	Trunk fat-free mass		0.03655	-0.12142	D1>D2					-0.01759	1.17678	0.152229	-0.08473	0.049558	1.03695	1.31662	0.00956	0.294897	858	0	30.911	10.806	0.607079	1.7e-49	0.03655
current MDE	Physical Measures	23123	Arm fat percentage (left)		0.048658	0.152229	D2>D1					-0.39779	0.105461	-0.18597	-0.48653	-0.30905	-0.07763	0.288556	-0.37084	-0.0011	590	2	18.7211	5.43449	5.76e-17	0.258051	0.048658

## Sheet: 19.cog_metabolic_phy_dictionary
Category
dependentVariable
Meaning
age	Effect size of age
sex	Effect size of sex
Dimension	Effect size of Dimension
age_b	beta of age
sex_b	beta of sex
Dimension_b	beta of dimension
age_CI_lower
age_CI_upper
sex_CI_lower
sex_CI_upper
Dimension_CI_lower
Dimension_CI_upper
age_p	fdr corrected p
sex_p	fdr corrected p
Dimension_p	fdr corrected p
n
out
dvMean
dvSD

## Sheet: 20. GP_Full_Psy
Supplementary Table x. Comparison of Depression-Related Traits, Anxiety, Trauma, and Self-Harm Across Dimension 1 and Dimension 2 Groups in the General Population (whole sample from UKB)
Category_based_on_Reference	Field ID	UKB Description	Chi_Squared	DF	P_Value	Cramers_V	N	Dimension1_count "No"	Dimension1_count "Yes"	Dimension1_proprtion "No"	Dimension1_proprtion "Yes"	Dimension2_count "No"	Dimension2_count "Yes"	Dimension2_proprtion "No"	Dimension2_proprtion "Yes"	StandardizedResidual_1_0	StandardizedResidual_1_1	StandardizedResidual_2_0	StandardizedResidual_2_1
Anxiety	1970	Nervous feelings	18.9998	1	1.31e-05	0.03375	16680	5625	1115	0.83457	0.16543	8031	1909	0.807948	0.192052	4.37935	-4.37935	-4.37935	4.37935
Neuroticism	2010	Suffer from 'nerves'	15.2493	1	9.42e-05	0.030373	16530	5757	924	0.861697	0.138303	8267	1582	0.839375	0.160625	3.92713	-3.92713	-3.92713	3.92713
Adverse life events	29078	Felt hated by family member as a child	13.1217	1	0.000292	0.031816	12963	4541	842	0.843582	0.156418	6209	1371	0.819129	0.180871	3.64607	-3.64607	-3.64607	3.64607
Life Style Factors	1478	Salt added to food	12.9719	1	0.000316	0.027578	17056	4114	2778	0.596924	0.403076	5784	4380	0.569067	0.430933	3.61746	-3.61746	-3.61746	3.61746
Adverse life events	29083	Physical violence by partner or ex-partner as an adult	12.3583	1	0.000439	0.030878	12962	4874	509	0.905443	0.094557	6715	864	0.886001	0.113999	3.5444	-3.5444	-3.5444	3.5444
Ever had Core Depressive Symptoms	20441	Ever had prolonged loss of interest in normal activities	10.8726	1	0.000976	0.030324	11824	3049	1794	0.629568	0.370432	4184	2797	0.599341	0.400659	3.31655	-3.31655	-3.31655	3.31655
Depression	20536	Weight change during worst episode of depression	9.54513	1	0.002005	0.041102	5650	978	1281	0.432935	0.567065	1327	2064	0.39133	0.60867	3.11715	-3.11715	-3.11715	3.11715
Adverse life events	29077	Physically abused by family as a child	8.39148	1	0.00377	0.025431	12975	4438	954	0.823071	0.176929	6087	1496	0.802717	0.197283	2.91956	-2.91956	-2.91956	2.91956
Self Harm	29116	Ever suicide	7.67618	1	0.005595	0.112734	604	130	99	0.567686	0.432314	168	207	0.448	0.552	2.85447	-2.85447	-2.85447	2.85447
Ever had Core Depressive Symptoms	20446	Ever had prolonged feelings of sadness or depression	7.3479	1	0.006714	0.024928	11825	2276	2565	0.470151	0.529849	3106	3878	0.444731	0.555269	2.72948	-2.72948	-2.72948	2.72948
Neuroticism	1990	Tense / 'highly strung'	7.33856	1	0.006749	0.021	16640	5979	764	0.886697	0.113303	8636	1261	0.872588	0.127412	2.73313	-2.73313	-2.73313	2.73313
PHQ-9	20518	Recent changes in speed/amount of moving or speaking	7.28479	1	0.006954	0.024808	11837	4631	215	0.955634	0.044366	6602	389	0.944357	0.055643	2.74151	-2.74151	-2.74151	2.74151
Depression	20437	Thoughts of death during worst depression	7.07498	1	0.007817	0.033573	6277	1297	1202	0.519008	0.480992	1830	1948	0.484383	0.515617	2.68567	-2.68567	-2.68567	2.68567
PHQ-9	20511	Recent poor appetite or overeating	6.42659	1	0.011242	0.023301	11837	4049	798	0.835362	0.164638	5712	1278	0.817167	0.182833	2.55965	-2.55965	-2.55965	2.55965
Life Style Factors	20116	Never smoking	5.78141	1	0.016197	0.018438	17006	4321	2547	0.62915	0.37085	6192	3946	0.610771	0.389229	2.42054	-2.42054	-2.42054	2.42054
Self Harm	20480	Ever self-harm	4.41407	1	0.035644	0.019325	11820	4657	184	0.961991	0.038009	6657	322	0.953862	0.046138	2.14717	-2.14717	-2.14717	2.14717
Anxiety	20509	Recent inability to stop or control worrying	4.16735	1	0.04121	0.018789	11805	3801	1030	0.786794	0.213206	5375	1599	0.77072	0.22928	2.0639	-2.0639	-2.0639	2.0639
Adverse life events	29081	Stopped from seeing friends or family by partner or ex-partner as an adult	4.10685	1	0.04271	0.017802	12959	4986	397	0.926249	0.073751	6942	634	0.916315	0.083685	2.05947	-2.05947	-2.05947	2.05947
Life Style Factors	1618	Alcohol usually taken with meals	3.98661	1	0.045863	0.019514	10469	1111	3196	0.257952	0.742048	1699	4463	0.275722	0.724278	-2.01906	2.01906	2.01906	-2.01906
Life Style Factors	1200	Sleeplessness	3.75789	1	0.052559	0.014849	17044	1568	5317	0.227741	0.772259	2185	7974	0.21508	0.78492	1.95736	-1.95736	-1.95736	1.95736
Adverse life events	29086	Experienced a violent or sexual assault	3.71283	1	0.053996	0.01692	12969	4920	474	0.912125	0.087875	6982	593	0.921716	0.078284	-1.95929	1.95929	1.95929	-1.95929
Anxiety	20512	Recent feelings of foreboding	3.6281	1	0.056812	0.017535	11800	4085	746	0.845581	0.154419	5800	1169	0.832257	0.167743	1.93014	-1.93014	-1.93014	1.93014
Neuroticism	1960	Fed-up feelings	3.61491	1	0.057264	0.014698	16734	4703	2056	0.695813	0.304187	6801	3174	0.681805	0.318195	1.91829	-1.91829	-1.91829	1.91829
PHQ-9	20514	Recent lack of interest or pleasure in doing things	2.93199	1	0.08684	0.015747	11824	4018	828	0.829137	0.170863	5699	1279	0.81671	0.18329	1.73674	-1.73674	-1.73674	1.73674
Life Style Factors	1190	Nap during day	2.92867	1	0.087019	0.013103	17057	3837	3055	0.556732	0.443268	5795	4370	0.570093	0.429907	-1.72707	1.72707	1.72707	-1.72707
Anxiety	20516	Recent restlessness	2.22653	1	0.135659	0.013721	11826	4299	542	0.88804	0.11196	6139	846	0.878883	0.121117	1.52121	-1.52121	-1.52121	1.52121
Neuroticism	2030	Guilty feelings	2.07879	1	0.149359	0.011159	16695	5034	1714	0.745999	0.254001	7320	2627	0.7359	0.2641	1.45978	-1.45978	-1.45978	1.45978
Depression	20450	Feelings of worthlessness during worst period of depression	2.0025	1	0.15704	0.017904	6247	1226	1259	0.49336	0.50664	1786	1976	0.474747	0.525253	1.44096	-1.44096	-1.44096	1.44096
Neuroticism	1980	Worrier / anxious feelings	1.55036	1	0.213082	0.00966	16615	3446	3280	0.51234	0.48766	4968	4921	0.502376	0.497624	1.26094	-1.26094	-1.26094	1.26094
Anxiety	20506	Recent feelings or nervousness or anxiety	1.5272	1	0.216534	0.011371	11812	3558	1280	0.735428	0.264572	5056	1918	0.724978	0.275022	1.25685	-1.25685	-1.25685	1.25685
Adverse life events	29085	Sexual intercourse by partner or ex-partner without consent as an adult	1.49552	1	0.221362	0.01076	12916	5092	280	0.947878	0.052122	7112	432	0.942736	0.057264	1.26203	-1.26203	-1.26203	1.26203
Neuroticism	1940	Irritability	1.35077	1	0.245143	0.00909	16346	4921	1677	0.745832	0.254168	7190	2558	0.737587	0.262413	1.18042	-1.18042	-1.18042	1.18042
Life Style Factors	1239	Current tobacco smoking	1.33148	1	0.248542	0.008835	17059	6659	233	0.966193	0.033807	9788	379	0.962723	0.037277	1.19585	-1.19585	-1.19585	1.19585
Neuroticism	1950	Sensitivity / hurt feelings	1.29173	1	0.255729	0.008835	16548	3664	3033	0.547111	0.452889	5300	4551	0.538016	0.461984	1.15244	-1.15244	-1.15244	1.15244
PHQ-9	20513	Recent thoughts of suicide or self-harm	1.21723	1	0.269904	0.010168	11773	4639	175	0.963648	0.036352	6677	282	0.959477	0.040523	1.15181	-1.15181	-1.15181	1.15181
PHQ-9	20519	Recent feelings of tiredness or low energy	1.13512	1	0.286685	0.009795	11832	2557	2287	0.52787	0.47213	3618	3370	0.517745	0.482255	1.08414	-1.08414	-1.08414	1.08414
Anxiety	20520	Recent worrying too much about different things	0.57583	1	0.447952	0.006982	11813	3369	1465	0.696938	0.303062	4817	2162	0.690213	0.309787	0.779118	-0.77912	-0.77912	0.779118
Depression	20435	Difficulty concentrating during worst depression	0.563147	1	0.452995	0.009762	5910	494	1851	0.210661	0.789339	721	2844	0.202244	0.797756	0.783327	-0.78333	-0.78333	0.783327
Neuroticism	1930	Miserableness	0.524701	1	0.468843	0.005585	16820	4465	2346	0.655557	0.344443	6506	3503	0.650015	0.349985	0.740853	-0.74085	-0.74085	0.740853
Anxiety	20515	Recent trouble relaxing	0.38101	1	0.537063	0.005678	11820	3503	1335	0.72406	0.27594	5018	1964	0.718705	0.281295	0.638112	-0.63811	-0.63811	0.638112
Adverse life events	29084	Sexual interference by partner or ex-partner without consent as an adult	0.35837	1	0.549413	0.005267	12916	5114	258	0.951973	0.048027	7163	381	0.949496	0.050504	0.639802	-0.6398	-0.6398	0.639802
Neuroticism	1920	Mood swings	0.288184	1	0.591387	0.004148	16747	4335	2426	0.641177	0.358823	6361	3625	0.636992	0.363008	0.55322	-0.55322	-0.55322	0.55322
Depression	20532	Did your sleep change	0.22912	1	0.632177	0.006342	5697	449	1819	0.197972	0.802028	660	2769	0.192476	0.807524	0.512844	-0.51284	-0.51284	0.512844
Neuroticism	2000	Worry too long after embarrassment	0.214853	1	0.64299	0.003629	16313	3486	3098	0.529465	0.470535	5114	4615	0.525645	0.474355	0.479505	-0.4795	-0.4795	0.479505
Life Style Factors	20160	Ever smoked	0.212914	1	0.644493	0.003538	17006	3170	3698	0.461561	0.538439	4717	5421	0.465279	0.534721	-0.4771	0.477096	0.477096	-0.4771
Neuroticism	2020	Loneliness, isolation	0.212099	1	0.645127	0.00355	16833	5883	930	0.863496	0.136504	8626	1394	0.860878	0.139122	0.483302	-0.4833	-0.4833	0.483302
Anxiety	20505	Recent easy annoyance or irritability	0.193728	1	0.659832	0.004054	11790	3539	1291	0.732712	0.267288	5073	1887	0.728879	0.271121	0.461248	-0.46125	-0.46125	0.461248
Adverse life events	29079	Sexually molested as a child	0.176598	1	0.674313	0.003706	12856	4886	468	0.912589	0.087411	6829	673	0.910291	0.089709	0.451691	-0.45169	-0.45169	0.451691
PHQ-9	20510	Recent feelings of depression	0.071606	1	0.789013	0.002462	11813	3836	1002	0.79289	0.20711	5515	1460	0.790681	0.209319	0.290625	-0.29063	-0.29063	0.290625
PHQ-9	20517	Trouble falling or staying asleep, or sleeping too much	0.019362	1	0.889332	0.001279	11833	2491	2352	0.514351	0.485649	3585	3405	0.512876	0.487124	0.157852	-0.15785	-0.15785	0.157852
PHQ-9	20508	Recent trouble concentrating on things	0.010847	1	0.917051	0.000957	11837	3948	898	0.814693	0.185307	5689	1302	0.813761	0.186239	0.128176	-0.12818	-0.12818	0.128176
PHQ-9	20507	Recent feelings of inadequacy	0.003171	1	0.955092	0.000518	11801	3894	937	0.806044	0.193956	5614	1356	0.805452	0.194548	0.079971	-0.07997	-0.07997	0.079971
Depression	20449	Feelings of tiredness during worst episode of depression	0.000186	1	0.989116	0.000176	5986	430	1944	0.181129	0.818871	656	2956	0.181617	0.818383	-0.04792	0.047922	0.047922	-0.04792

## Sheet: 21. CD_Full_Psy
Supplementary Table x. Comparison of Depression-Related Traits, Anxiety, Trauma, and Self-Harm Across Dimension 1 and Dimension 2 Groups in the Currently depressed subset
Category_based_on_Reference	Field ID	UKB Description	Chi_Squared	DF	P_Value	Cramers_V	Dimension1_count "No"	Dimension1_count "Yes"	Dimension1_proprtion "No"	Dimension1_proprtion "Yes"	Dimension2_count "No"	Dimension2_count "Yes"	Dimension2_proprtion "No"	Dimension2_proprtion "Yes"	StandardizedResidual_1_0	StandardizedResidual_1_1	StandardizedResidual_2_0	StandardizedResidual_2_1
Adverse life events	29077	Physically abused by family as a child	11.5225	1	0.000688	0.172328	123	34	0.783439	0.216561	142	89	0.614719	0.385281	-3.50562	-3.50562	3.50562	-0.12496
Adverse life events	29083	Physical violence by partner or ex-partner as an adult	7.84304	1	0.005102	0.14236	136	21	0.866242	0.133758	171	59	0.743478	0.256522	-2.92837	-2.92837	2.92837	-0.20388
Neuroticism	2030	Guilty feelings	6.33816	1	0.011817	0.108844	96	111	0.463768	0.536232	115	213	0.35061	0.64939	-2.60839	-2.60839	2.60839	-1.30418
Depression	20437	Thoughts of death during worst depression	6.13753	1	0.013234	0.144485	42	72	0.368421	0.631579	41	139	0.227778	0.772222	-2.61036	-2.61036	2.61036	-0.97365
Adverse life events	29078	Felt hated by family member as a child	5.3206	1	0.021075	0.11771	106	50	0.679487	0.320513	127	101	0.557018	0.442982	-2.413	-2.413	2.413	-0.18998
Adverse life events	29081	Stopped from seeing friends or family by partner or ex-partner as an adult	4.78268	1	0.028747	0.111456	134	21	0.864516	0.135484	177	53	0.769565	0.230435	-2.3188	-2.3188	2.3188	-0.2087
Self Harm	29116	Ever attempted suicide	4.02737	1	0.044768	0.247024	13	11	0.541667	0.458333	11	31	0.261905	0.738095	-2.2728	-2.2728	2.2728	-1.19395
Adverse life events	29085	Sexual intercourse by partner or ex-partner without consent as an adult	3.91797	1	0.047773	0.100748	142	14	0.910256	0.089744	192	38	0.834783	0.165217	-2.13128	-2.13128	2.13128	0.28051
PHQ-9	20518	Recent changes in speed/amount of moving or speaking	3.85944	1	0.049467	0.103397	113	25	0.818841	0.181159	161	62	0.721973	0.278027	-2.09117	-2.09117	2.09117	0.650657
Lifestyle Factors	1239	Current tobacco smoking	3.74206	1	0.053059	0.08256	205	8	0.962441	0.037559	308	28	0.916667	0.083333	2.11135	-2.11135	-2.11135	2.11135
Neuroticism	1930	Miserableness	3.56224	1	0.059108	0.080921	37	175	0.174528	0.825472	82	250	0.246988	0.753012	1.99372	1.99372	-1.99372	-2.33624
Neuroticism	1990	Tense / 'highly strung'	3.08852	1	0.078847	0.076554	145	62	0.700483	0.299517	199	121	0.621875	0.378125	-1.85109	-1.85109	1.85109	-1.65092
Lifestyle Factors	1190	Nap during day	3.06053	1	0.080216	0.065841	137	127	0.518939	0.481061	198	244	0.447964	0.552036	1.82732	-1.82732	-1.82732	1.82732
Neuroticism	1970	Nervous feelings	3.03132	1	0.081672	0.075485	136	66	0.673267	0.326733	196	134	0.593939	0.406061	-1.83329	-1.83329	1.83329	2.07739
Anxiety	20505	Recent easy annoyance or irritability	2.94001	1	0.08641	0.089996	65	75	0.464286	0.535714	82	141	0.367713	0.632287	-1.82448	-1.82448	1.82448	-0.37036
Anxiety	20515	Recent trouble relaxing	2.90538	1	0.088284	0.089464	61	79	0.435714	0.564286	76	147	0.340807	0.659193	-1.81574	-1.81574	1.81574	-0.33748
Adverse life events	29079	Sexually molested as a child	2.85576	1	0.091047	0.086463	133	22	0.858065	0.141935	178	49	0.784141	0.215859	-1.82383	-1.82383	1.82383	-0.1362
Anxiety	20509	Recent inability to stop or control worrying	2.67634	1	0.10185	0.085865	67	73	0.478571	0.521429	86	137	0.38565	0.61435	-1.74514	-1.74514	1.74514	-0.28106
Anxiety	20520	Recent worrying too much about different things	2.17256	1	0.140493	0.077363	56	84	0.4	0.6	71	152	0.318386	0.681614	-1.58701	-1.58701	1.587	0.334239
Adverse life events	29086	Experienced a violent or sexual assault	2.1392	1	0.143577	0.074348	138	20	0.873418	0.126582	186	43	0.812227	0.187773	-1.60267	-1.60267	1.60267	-0.27986
Neuroticism	2010	Suffer from 'nerves'	1.91891	1	0.165977	0.060747	132	72	0.647059	0.352941	184	132	0.582278	0.417722	-1.47722	-1.47722	1.47722	1.56297
Adverse life events	29084	Sexual interference by partner or ex-partner without consent as an adult	1.22723	1	0.267947	0.056386	140	17	0.89172	0.10828	194	35	0.847162	0.152838	-1.25955	-1.25955	1.25954	-0.20217
Anxiety	20506	Recent feelings or nervousness or anxiety	1.11441	1	0.291126	0.055408	62	78	0.442857	0.557143	85	138	0.381166	0.618834	-1.16549	-1.16549	1.16549	0.492076
PHQ-9	20519	Recent feelings of tiredness or low energy	1.10998	1	0.292087	0.055297	35	105	0.25	0.75	44	179	0.197309	0.802691	-1.18421	-1.18421	1.18421	0.740005
PHQ-9	20514	Recent lack of interest or pleasure in doing things	0.942482	1	0.33164	0.051309	62	78	0.442857	0.557143	84	134	0.385321	0.614679	-1.08101	-1.08101	1.08101	0.935713
Neuroticism	1920	Mood swings	0.909868	1	0.340149	0.040747	46	167	0.215962	0.784038	60	275	0.179104	0.820896	-1.0648	-1.0648	1.0648	-2.86694
Anxiety	20512	Recent feelings of foreboding	0.905189	1	0.341394	0.050005	79	60	0.568345	0.431655	114	109	0.511211	0.488789	-1.05972	-1.05972	1.05972	0.476627
Lifestyle Factors	1478	Salt added to food	0.885477	1	0.346706	0.035415	149	115	0.564394	0.435606	232	210	0.524887	0.475113	1.01903	-1.01903	-1.01903	1.01903
PHQ-9	20511	Recent poor appetite or overeating	0.830759	1	0.362053	0.047839	78	62	0.557143	0.442857	112	111	0.502242	0.497758	-1.01941	-1.01941	1.01941	0.919256
Neuroticism	2020	Loneliness, isolation	0.752652	1	0.385638	0.037403	99	110	0.473684	0.526316	142	187	0.431611	0.568389	-0.95649	-0.95649	0.956493	-1.45312
Lifestyle Factors	1200	Sleeplessness / insomnia	0.705861	1	0.400821	0.035857	28	185	0.131455	0.868545	35	301	0.104167	0.895833	-0.97755	-0.97755	0.977554	0.035294
PHQ-9	20508	Recent trouble concentrating on things	0.487185	1	0.485186	0.036635	72	68	0.514286	0.485714	105	118	0.470852	0.529148	-0.80585	-0.80585	0.805849	-0.88496
Neuroticism	2000	Worry too long after embarrassment	0.424011	1	0.514942	0.028205	65	140	0.317073	0.682927	94	234	0.286585	0.713415	-0.74846	-0.74846	0.748461	1.54329
Lifestyle Factors	20116	Nerver smoking	0.357207	1	0.550062	0.022494	155	109	0.587121	0.412879	248	194	0.561086	0.438914	0.676244	-0.67624	-0.67624	0.676244
Neuroticism	1940	Irritability	0.344801	1	0.557071	0.025652	104	98	0.514851	0.485149	156	166	0.484472	0.515528	-0.67696	-0.67696	0.676956	2.22226
Anxiety	20516	Recent restlessness	0.314576	1	0.574886	0.029438	94	46	0.671429	0.328571	142	81	0.636771	0.363229	-0.67392	-0.67392	0.673917	0.3266
Lifestyle Factors	20160	Ever smoked	0.292137	1	0.588854	0.023068	92	121	0.431925	0.568075	136	200	0.404762	0.595238	-0.62937	-0.62937	0.629366	0.073664
Depression	20536	Weight change during worst episode of depression	0.285326	1	0.593232	0.029404	43	79	0.352459	0.647541	66	142	0.317308	0.682692	0.655392	-0.65539	-0.65539	0.655392
PHQ-9	20507	Recent feelings of inadequacy	0.284708	1	0.593632	0.028044	59	81	0.421429	0.578571	86	136	0.387387	0.612613	-0.6437	-0.6437	0.643703	0.812174
PHQ-9	20510	Recent feelings of depression	0.229397	1	0.631971	0.025208	55	85	0.392857	0.607143	80	141	0.361991	0.638009	-0.59058	-0.59058	0.590576	-0.69381
Depression	20532	Did your sleep change	0.216456	1	0.641754	0.027705	17	90	0.158879	0.841121	23	152	0.131429	0.868571	-0.64112	-0.64112	0.64112	-1.08446
Neuroticism	1950	Sensitivity / hurt feelings	0.126689	1	0.72189	0.015475	59	141	0.295	0.705	91	238	0.276596	0.723404	-0.4554	-0.4554	0.455401	-2.12062
Neuroticism	1980	Worrier / anxious feelings	0.125558	1	0.723082	0.015291	57	150	0.275362	0.724638	85	245	0.257576	0.742424	-0.45486	-0.45486	0.454861	1.85403
Neuroticism	1960	Fed-up feelings	0.108464	1	0.7419	0.014146	41	169	0.195238	0.804762	70	262	0.210843	0.789157	0.438581	0.438581	-0.43858	-2.10238
PHQ-9	20513	Recent thoughts of suicide or self-harm	0.009358	1	0.922937	0.005134	102	35	0.744526	0.255474	160	58	0.733945	0.266055	-0.22071	-0.22071	0.220709	-0.51649
Depression	20441	Ever had prolonged loss of interest in normal activities	0.003714	1	0.951404	0.003203	34	106	0.242857	0.757143	52	170	0.234234	0.765766	-0.18773	-0.18773	0.187735	-1.12715
Depression	20446	Ever had prolonged feelings of sadness or depression	0.000413	1	0.983789	0.001068	23	117	0.164286	0.835714	35	187	0.157658	0.842342	-0.16743	-0.16743	0.167429	-1.14915
Depression	20449	Feelings of tiredness during worst episode of depression	1.55e-30	1	1	7.4e-17	13	96	0.119266	0.880734	20	155	0.114286	0.885714	-0.12737	-0.12737	0.127367	-1.0966
Depression	20435	Difficulty concentrating during worst depression	1.58e-30	1	1	7.59e-17	14	89	0.135922	0.864078	23	149	0.133721	0.866279	-0.05178	-0.05178	0.05178	-1.02838
Depression	20450	Feelings of worthlessness during worst period of depression	8.97e-31	1	1	5.47e-17	23	91	0.201754	0.798246	38	148	0.204301	0.795699	0.053196	0.053196	-0.0532	1.0278
Lifestyle Factors	1618	Alcohol usually taken with meals	1.2e-30	1	1	6.26e-17	42	69	0.378378	0.621622	74	120	0.381443	0.618557	-0.05305	0.053048	0.053048	-0.05305
PHQ-9	20517	Trouble falling or staying asleep, or sleeping too much	1.21e-30	1	1	5.79e-17	33	107	0.235714	0.764286	53	167	0.240909	0.759091	0.112686	0.112686	-0.11269	0.626404
Self Harm	20480	Ever self-harmed	1.62e-29	1	1	2.12e-16	116	23	0.834532	0.165468	186	36	0.837838	0.162162	0.08265	0.08265	-0.08265	-1.2
					21.5294

## Sheet: 22. Psy_summary
UKB group	Category	Variable	Meaning	Greater in D1/D2	Chi_Squared	DF	P_Value	Cramers_V	Total_N	Dimension1_count "No"	Dimension1_count "Yes"	Dimension1_proprtion "No"	Dimension1_proprtion "Yes"	Dimension2_count "No"	Dimension2_count "Yes"	Dimension2_proprtion "No"	Dimension2_proprtion "Yes"	StandardizedResidual_1_0	StandardizedResidual_1_1	StandardizedResidual_2_0	StandardizedResidual_2_1
general population	Anxiety	20509	Recent inability to stop or control worrying	D2	4.16735	1	0.04121	0.018789	11805	3801	1030	0.786794	0.213206	5375	1599	0.77072	0.22928	2.0639	-2.0639	-2.0639	2.0639
general population	Ever had Core Depressive Symptoms	20441	Ever had prolonged loss of interest in normal activities	D2	10.8726	1	0.000976	0.030324	11824	3049	1794	0.629568	0.370432	4184	2797	0.599341	0.400659	3.31655	-3.31655	-3.31655	3.31655
general population	Ever had Core Depressive Symptoms	20446	Ever had prolonged feelings of sadness or depression	D2	7.3479	1	0.006714	0.024928	11825	2276	2565	0.470151	0.529849	3106	3878	0.444731	0.555269	2.72948	-2.72948	-2.72948	2.72948
general population	Neuroticism	1970	Nervous feelings	D2	18.9998	1	1.31e-05	0.03375	16680	5625	1115	0.83457	0.16543	8031	1909	0.807948	0.192052	4.37935	-4.37935	-4.37935	4.37935
general population	Neuroticism	2010	Suffer from 'nerves'	D2	15.2493	1	9.42e-05	0.030373	16530	5757	924	0.861697	0.138303	8267	1582	0.839375	0.160625	3.92713	-3.92713	-3.92713	3.92713
general population	Neuroticism	1990	Tense / 'highly strung'	D2	7.33856	1	0.006749	0.021	16640	5979	764	0.886697	0.113303	8636	1261	0.872588	0.127412	2.73313	-2.73313	-2.73313	2.73313
general population	Depressive Symptoms During worst period of depression	20437	Thoughts of death during worst depression	D2	7.07498	1	0.007817	0.033573	6277	1297	1202	0.519008	0.480992	1830	1948	0.484383	0.515617	2.68567	-2.68567	-2.68567	2.68567
general population	PHQ-9	20518	Recent changes in speed/amount of moving or speaking	D2	7.28479	1	0.006954	0.024808	11837	4631	215	0.955634	0.044366	6602	389	0.944357	0.055643	2.74151	-2.74151	-2.74151	2.74151
general population	PHQ-9	20511	Recent poor appetite or overeating	D2	6.42659	1	0.011242	0.023301	11837	4049	798	0.835362	0.164638	5712	1278	0.817167	0.182833	2.55965	-2.55965	-2.55965	2.55965
general population	Self Harm	29116	Ever suicide	D2	7.67618	1	0.005595	0.112734	604	130	99	0.567686	0.432314	168	207	0.448	0.552	2.85447	-2.85447	-2.85447	2.85447
general population	Self Harm	20480	Ever self-harm	D2	4.41407	1	0.035644	0.019325	11820	4657	184	0.961991	0.038009	6657	322	0.953862	0.046138	2.14717	-2.14717	-2.14717	2.14717
general population	Trauma	29078	Felt hated by family member as a child	D2	13.1217	1	0.000292	0.031816	12963	4541	842	0.843582	0.156418	6209	1371	0.819129	0.180871	3.64607	-3.64607	-3.64607	3.64607
general population	Trauma	29083	Physical violence by partner or ex-partner as an adult	D2	12.3583	1	0.000439	0.030878	12962	4874	509	0.905443	0.094557	6715	864	0.886001	0.113999	3.5444	-3.5444	-3.5444	3.5444
general population	Trauma	29077	Physically abused by family as a child	D2	8.39148	1	0.00377	0.025431	12975	4438	954	0.823071	0.176929	6087	1496	0.802717	0.197283	2.91956	-2.91956	-2.91956	2.91956
general population	Trauma	29081	Stopped from seeing friends or family by partner or ex-partner as an adult	D2	4.10685	1	0.04271	0.017802	12959	4986	397	0.926249	0.073751	6942	634	0.916315	0.083685	2.05947	-2.05947	-2.05947	2.05947
general population	Life Style Factors	1618	Alcohol usually taken with meals	D1	3.98661	1	0.045863	0.019514	10469	1111	3196	0.257952	0.742048	1699	4463	0.275722	0.724278	-2.01906	2.01906	2.01906	-2.01906
general population	Life Style Factors	20116	Never smoking	D2	5.78141	1	0.016197	0.018438	17006	4321	2547	0.62915	0.37085	6192	3946	0.610771	0.389229	2.42054	-2.42054	-2.42054	2.42054
general population	Life Style Factors	1478	Salt added to food	D2	12.9719	1	0.000316	0.027578	17056	4114	2778	0.596924	0.403076	5784	4380	0.569067	0.430933	3.61746	-3.61746	-3.61746	3.61746
current MDE	Adverse life events	29077	Physically abused by family as a child	D2	11.5225	1	0.000688	0.172328		123	34	0.783439	0.216561	142	89	0.614719	0.385281	-3.50562	-3.50562	3.50562	-0.12496
current MDE	Adverse life events	29083	Physical violence by partner or ex-partner as an adult	D2	7.84304	1	0.005102	0.14236		136	21	0.866242	0.133758	171	59	0.743478	0.256522	-2.92837	-2.92837	2.92837	-0.20388
current MDE	Neuroticism	2030	Guilty feelings	D2	6.33816	1	0.011817	0.108844		96	111	0.463768	0.536232	115	213	0.35061	0.64939	-2.60839	-2.60839	2.60839	-1.30418
current MDE	Depression	20437	Thoughts of death during worst depression	D2	6.13753	1	0.013234	0.144485		42	72	0.368421	0.631579	41	139	0.227778	0.772222	-2.61036	-2.61036	2.61036	-0.97365
current MDE	Adverse life events	29078	Felt hated by family member as a child	D2	5.3206	1	0.021075	0.11771		106	50	0.679487	0.320513	127	101	0.557018	0.442982	-2.413	-2.413	2.413	-0.18998
current MDE	Adverse life events	29081	Stopped from seeing friends or family by partner or ex-partner as an adult	D2	4.78268	1	0.028747	0.111456		134	21	0.864516	0.135484	177	53	0.769565	0.230435	-2.3188	-2.3188	2.3188	-0.2087
current MDE	Self Harm	29116	Ever attempted suicide	D2	4.02737	1	0.044768	0.247024		13	11	0.541667	0.458333	11	31	0.261905	0.738095	-2.2728	-2.2728	2.2728	-1.19395
current MDE	Adverse life events	29085	Sexual intercourse by partner or ex-partner without consent as an adult	D2	3.91797	1	0.047773	0.100748		142	14	0.910256	0.089744	192	38	0.834783	0.165217	-2.13128	-2.13128	2.13128	0.28051
current MDE	PHQ-9	20518	Recent changes in speed/amount of moving or speaking	D2	3.85944	1	0.049467	0.103397		113	25	0.818841	0.181159	161	62	0.721973	0.278027	-2.09117	-2.09117	2.09117	0.650657

## Sheet: 23. CD_Psy_dictionary
Category_based_on_Reference	Explanation
Variable
Meaning
Chi_Squared
DF
P_Value	FDR-corrected P value
Cramers_V	Effect Size
Dimension1_0_Count	number of choosing "No" in Dimension 1 group
Dimension1_1_Count	number of choosing "Yes" in Dimension 1 group
Dimension1_0_Prop	proportion of choosing "No" in Dimension 1 group
Dimension1_1_Prop	proportion of choosing "Yes" in Dimension 1 group
Dimension2_0_Count	number of choosing "No" in Dimension 2 group
Dimension2_1_Count	number of choosing "Yes" in Dimension 2 group
Dimension2_0_Prop	proportion of choosing "No" in Dimension 2 group
Dimension2_1_Prop	proportion of choosing "Yes" in Dimension 2 group
StandardizedResidual_1_0	The standardised residual for group 1 and the response "No."
StandardizedResidual_1_1	The standardised residual for group 1 and the response "Yes."
StandardizedResidual_2_0	The standardised residual for group 2 and the response "No."
StandardizedResidual_2_1	The standardised residual for group 2 and the response "Yes."

[truncated: 8 more sheets: 24. E1_Independant Sig SNPs, 25. E2_Independant Sig SNPs, 26. E1_SNPs, 27. E2_SNPs, 28. E1_GWAS_catalog, 29. E2_GWAS_catalog, 30.cog_metabolic_phys_subgroups, 31.Full_psy_subgroups]
