# Supplementary material for: Neuroanatomical dimensions in major depression: external validation and links with cognition, adverse life events, self-harm, metabolomics and genetics
Source: Research Square preprint supplement (doi:10.21203/rs.3.rs-5975731/v1), 2025-03-26
Supplement: Supplementary file 1 [file 48da6cc4b7a40f6fb36def5d.pdf]

## Supplementary Materials

### Table of Contents

|                                                                                                                             |    |
|-----------------------------------------------------------------------------------------------------------------------------|----|
| STROBE Statement: checklist of items that should be included in reports of observational studies .....                      | 3  |
| Supplementary Methods: UKB Participants Selection Criteria for Current Depressive Symptoms.....                             | 6  |
| Supplementary Methods: External validation of pre-trained HYDRA model to UKB general population (Junhao et al., 2022) ..... | 7  |
| Supplementary Methods: Brain Volumetric Differences Across Dimension Membership Groups.....                                 | 8  |
| Supplementary Methods: UKB Items for Cognitive Measures .....                                                               | 9  |
| Supplementary Table 1. Cognitive test measures and UK Biobank codes .....                                                   | 10 |
| Supplementary Methods: UKB Items for Depressive Symptoms .....                                                              | 11 |
| Supplementary Table 2. Depressive Symptoms Measures and UK Biobank codes .....                                              | 12 |
| Supplementary Methods: UKB Items for Anxiety-Related Traits.....                                                            | 14 |
| Supplementary Table 3. Anxiety-related Measures and UK Biobank codes .....                                                  | 14 |
| Supplementary Methods: UKB Items for Neuroticism-Related Traits.....                                                        | 15 |
| Supplementary Table 4. Neuroticism Measures and UK Biobank codes .....                                                      | 15 |
| Supplementary Methods: UKB Items for adverse life events .....                                                              | 16 |
| Supplementary Table 5. Adverse Life Events measures and UK Biobank codes .....                                              | 17 |
| Supplementary Methods: UKB Items for Self-Harm .....                                                                        | 18 |
| Supplementary Table 6. Self-harm behaviors measures and UK Biobank codes .....                                              | 18 |
| Supplementary Methods: UKB Items for lifestyle factors .....                                                                | 19 |
| Supplementary Table 7. Lifestyle factors measures and UK Biobank codes .....                                                | 20 |
| Supplementary Methods: UKB Items for Metabolic Measures.....                                                                | 21 |
| Supplementary Table 8. Metabolic Measures and UK Biobank codes.....                                                         | 21 |
| Supplementary Methods: UKB Items for Physical Measures.....                                                                 | 24 |
| Supplementary Table 9. Physical Measures and UK Biobank codes.....                                                          | 24 |
| Supplementary Methods: Genetic analysis .....                                                                               | 25 |
| Supplementary Methods: Presentation of statistics (Junhao et al., 2022).....                                                | 26 |
| Supplementary Table 10. Research Domain Criteria (RDoC) assessment items and criteria thresholds .....                      | 27 |

|                                                                                                                                                                                                                                                                                                                                                                                                                       |    |
|-----------------------------------------------------------------------------------------------------------------------------------------------------------------------------------------------------------------------------------------------------------------------------------------------------------------------------------------------------------------------------------------------------------------------|----|
| Supplementary Figure 1. Heatmaps of group means for all significant MUSE features. Normalized heatmaps used a consistent color scale to visually highlight the magnitude and direction of group-level differences, making patterns more interpretable. ....                                                                                                                                                           | 28 |
| Supplementary Figure 2. UK Biobank currently depressed subsample significant differences in Adverse Life Events and Self Harm variables between D1 and D2. Participants in the D2 group said “yes” to having attempted suicide and to having experienced adverse life events in significantly higher proportions than participants in the D1 group. Significance was determined using two-sided Chi-Square test. .... | 32 |
| Supplementary Figure 3. UK Biobank currently depressed subsample metabolomic comparisons between D1 and D2. ....                                                                                                                                                                                                                                                                                                      | 33 |
| Supplementary Figure 4. UK Biobank currently depressed subsample physical measures between D1 and D2. ....                                                                                                                                                                                                                                                                                                            | 34 |
| Supplementary Table 11. RDoC Domains Distributions Across Dimension 1 and 2 Groups in COORD-MDD .....                                                                                                                                                                                                                                                                                                                 | 35 |
| Supplementary Table 12. Comparison of Phenotype Distributions Across Dimension 1 and 2 Groups in COORD-MDD .....                                                                                                                                                                                                                                                                                                      | 36 |
| Supplementary Figure 5. Comparison of D1 and D2 total score on clinical assessment items used to measure phenotypes (Amin et al., 2018) and RDoC domains (Citrome et al., 2022). ...                                                                                                                                                                                                                                  | 37 |
| Supplementary Figure 6. Overlap between phenotype positive participants (Core Depression (CD), Anxiety (ANX) and Neurovegetative Symptoms of Melancholia (NVSM)) in the COORD-MDD full sample, Dimension 1 and Dimension 2. ....                                                                                                                                                                                      | 38 |
| Supplementary Table 13. Demographic information for UKB subsample of participants with bipolar disorder for total sample and classification groups .....                                                                                                                                                                                                                                                              | 39 |
| Supplementary Table 14. Demographic information for UKB general population subgroups for sensitivity analysis. ....                                                                                                                                                                                                                                                                                                   | 40 |
| References .....                                                                                                                                                                                                                                                                                                                                                                                                      | 41 |

**STROBE Statement: checklist of items that should be included in reports of observational studies**

| Item                 | No | Recommendation                                                                                                                                                                                                                                                                                                                                                                                                                                                                 | Page No.           |
|----------------------|----|--------------------------------------------------------------------------------------------------------------------------------------------------------------------------------------------------------------------------------------------------------------------------------------------------------------------------------------------------------------------------------------------------------------------------------------------------------------------------------|--------------------|
| Title and abstract   | 1  | (a) Indicate the study's design with a commonly used term in the title or the abstract                                                                                                                                                                                                                                                                                                                                                                                         | Title and abstract |
|                      |    | (b) Provide in the abstract an informative and balanced summary of what was done and what was found                                                                                                                                                                                                                                                                                                                                                                            | Title and abstract |
| Introduction         |    |                                                                                                                                                                                                                                                                                                                                                                                                                                                                                |                    |
| Background/rationale | 2  | Explain the scientific background and rationale for the investigation being reported                                                                                                                                                                                                                                                                                                                                                                                           |                    |
| Objectives           | 3  | State specific objectives, including any prespecified hypotheses                                                                                                                                                                                                                                                                                                                                                                                                               |                    |
| Methods              |    |                                                                                                                                                                                                                                                                                                                                                                                                                                                                                |                    |
| Study design         | 4  | Present key elements of study design early in the paper                                                                                                                                                                                                                                                                                                                                                                                                                        |                    |
| Setting              | 5  | Describe the setting, locations, and relevant dates, including periods of recruitment, exposure, follow-up, and data collection                                                                                                                                                                                                                                                                                                                                                |                    |
| Participants         | 6  | (a) <i>Cohort study</i> —Give the eligibility criteria, and the sources and methods of selection of participants. Describe methods of follow-up<br><br><i>Case-control study</i> —Give the eligibility criteria, and the sources and methods of case ascertainment and control selection. Give the rationale for the choice of cases and controls<br><br><i>Cross-sectional study</i> —Give the eligibility criteria, and the sources and methods of selection of participants |                    |
|                      |    | (b) <i>Cohort study</i> —For matched studies, give matching criteria and number of exposed and unexposed<br><br><i>Case-control study</i> —For matched studies, give matching criteria and the number of controls per case                                                                                                                                                                                                                                                     |                    |
| Variables            | 7  | Clearly define all outcomes, exposures, predictors, potential confounders, and effect modifiers. Give diagnostic criteria, if applicable                                                                                                                                                                                                                                                                                                                                       |                    |

|                              |     |                                                                                                                                                                                                                                                                                                                   |  |
|------------------------------|-----|-------------------------------------------------------------------------------------------------------------------------------------------------------------------------------------------------------------------------------------------------------------------------------------------------------------------|--|
| Data sources/<br>measurement | 8*  | For each variable of interest, give sources of data and details of methods of assessment (measurement). Describe comparability of assessment methods if there is more than one group                                                                                                                              |  |
| Bias                         | 9   | Describe any efforts to address potential sources of bias                                                                                                                                                                                                                                                         |  |
| Study size                   | 10  | Explain how the study size was arrived at                                                                                                                                                                                                                                                                         |  |
| Quantitative variables       | 11  | Explain how quantitative variables were handled in the analyses. If applicable, describe which groupings were chosen and why                                                                                                                                                                                      |  |
| Statistical methods          | 12  | (a) Describe all statistical methods, including those used to control for confounding                                                                                                                                                                                                                             |  |
|                              |     | (b) Describe any methods used to examine subgroups and interactions                                                                                                                                                                                                                                               |  |
|                              |     | (c) Explain how missing data were addressed                                                                                                                                                                                                                                                                       |  |
|                              |     | (d) <i>Cohort study</i> —If applicable, explain how loss to follow-up was addressed<br><br><i>Case-control study</i> —If applicable, explain how matching of cases and controls was addressed<br><br><i>Cross-sectional study</i> —If applicable, describe analytical methods taking account of sampling strategy |  |
|                              |     | (e) Describe any sensitivity analyses                                                                                                                                                                                                                                                                             |  |
| <b>Results</b>               |     |                                                                                                                                                                                                                                                                                                                   |  |
| Participants                 | 13* | (a) Report numbers of individuals at each stage of study—eg numbers potentially eligible, examined for eligibility, confirmed eligible, included in the study, completing follow-up, and analysed                                                                                                                 |  |
|                              |     | (b) Give reasons for non-participation at each stage                                                                                                                                                                                                                                                              |  |
|                              |     | (c) Consider use of a flow diagram                                                                                                                                                                                                                                                                                |  |
| Descriptive data             | 14* | (a) Give characteristics of study participants (eg demographic, clinical, social) and information on exposures and potential confounders                                                                                                                                                                          |  |
|                              |     | (b) Indicate number of participants with missing data for each variable of interest                                                                                                                                                                                                                               |  |

|                          |     |                                                                                                                                                                                                              |  |
|--------------------------|-----|--------------------------------------------------------------------------------------------------------------------------------------------------------------------------------------------------------------|--|
|                          |     | (c) <i>Cohort study</i> —Summarise follow-up time (eg, average and total amount)                                                                                                                             |  |
| Outcome data             | 15* | <i>Cohort study</i> —Report numbers of outcome events or summary measures over time                                                                                                                          |  |
|                          |     | <i>Case-control study</i> —Report numbers in each exposure category, or summary measures of exposure                                                                                                         |  |
|                          |     | <i>Cross-sectional study</i> —Report numbers of outcome events or summary measures                                                                                                                           |  |
| Main results             | 16  | (a) Give unadjusted estimates and, if applicable, confounder-adjusted estimates and their precision (eg, 95% confidence interval). Make clear which confounders were adjusted for and why they were included |  |
|                          |     | (b) Report category boundaries when continuous variables were categorized                                                                                                                                    |  |
|                          |     | (c) If relevant, consider translating estimates of relative risk into absolute risk for a meaningful time period                                                                                             |  |
| Other analyses           | 17  | Report other analyses done—eg analyses of subgroups and interactions, and sensitivity analyses                                                                                                               |  |
| <b>Discussion</b>        |     |                                                                                                                                                                                                              |  |
| Key results              | 18  | Summarise key results with reference to study objectives                                                                                                                                                     |  |
| Limitations              | 19  | Discuss limitations of the study, taking into account sources of potential bias or imprecision. Discuss both direction and magnitude of any potential bias                                                   |  |
| Interpretation           | 20  | Give a cautious overall interpretation of results considering objectives, limitations, multiplicity of analyses, results from similar studies, and other relevant evidence                                   |  |
| Generalisability         | 21  | Discuss the generalisability (external validity) of the study results                                                                                                                                        |  |
| <b>Other information</b> |     |                                                                                                                                                                                                              |  |
| Funding                  | 22  | Give the source of funding and the role of the funders for the present study and, if applicable, for the original study on which the present article is based                                                |  |

## **Supplementary Methods: UKB Participants Selection Criteria for Current Depressive Symptoms**

Within the UK Biobank (UKB) general population cohort, a subset of individuals with current depression was identified using the following two UKB data fields.

Based on the UKB data fields:

- 2050: "frequency of depressed mood over the past two weeks"
- 2060: "frequency of unenthusiasm or disinterest over the past two weeks":

The potential ratings were:

1. 'Not at all'
2. 'Several days'
3. 'More than half the days'
4. 'Nearly every day'

Inclusion criteria were participants who endorsed responses of either "3: More than half the days" or "4: Nearly every day" were selected.

Exclusion criteria were comorbid psychiatric, neurological, or medical disorders identified through ICD-10 diagnostic codes (data field: 41202). A total of 21 participants were excluded based on these criteria. Comorbid psychiatric disorders were: F200, "paranoid schizophrenia", 3 participants; F209, "unspecified schizophrenia", 3 participants; F239, "acute and transient psychotic disorders", 1 participant; F250, "schizoaffective disorders", 1 participant; F319, "unspecified bipolar affective disorder", 6 participants; F21, "schizotypal disorder", 0 participants; F30, "manic episodes", 0 participants; F42, "obsessive-compulsive disorder", 0 participants; and F43, "reaction to severe stress or post-Adverse life eventstic stress disorder", 1 participant. Neurological disorders were Parkinson's disease (G20, "Parkinson's disease", 2 participants), Huntington's disease (G10, "Huntington's disease", 0 participants), Alzheimer's disease (G30, "Alzheimer's disease", 0 participants), and epilepsy (G40, "epilepsy", 0 participants). Medical disorders were primary hypertension (I10, "primary hypertension", 20 participants); insulin-dependent diabetes mellitus (E10, "insulin-dependent diabetes mellitus", 0 participants), gestational diabetes (O240, "gestational diabetes", 0 participants).

## Supplementary Methods: External validation of pre-trained HYDRA model to UKB general population (Junhao et al., 2022)

Once the HYDRA model was trained on the COORDMDD dataset, the optimal polytope distinguishing the diagnosis group across  $k$  dimensions was identified and saved. This polytope was defined in high-dimensional space using the weight ( $w_i$ ) and bias ( $b_i$ ) parameters, where  $i$  represents the  $i$ -th linear SVM.

For each subtype ( $k$ ), the corresponding pre-trained SVM model is retrieved, containing the weights and biases that define the hyperplane for that dimension. The expression score ( $E$ ) for each participant is then calculated as the dot product of the feature matrix ( $X$ ) with the weight vector ( $w_i$ ), adjusted by the bias ( $b_i$ ).

Mathematically, the expression score ( $E$ ) is calculated based on the distance from the respective SVM hyperplanes:

$$E = X \cdot w_i^T + b_i$$

where  $X$  represents the feature matrix (consisting of 207 ROI volumes) for the UKBB participants. A higher score suggests a greater alignment with the anatomical profile of the specific subtype, whereas a lower score indicates a profile more similar to control-like anatomy. The dimension membership  $D$  for each individual can be determined using hard-coded thresholds or criteria derived from the SVM outputs.

## **Supplementary Methods: Brain Volumetric Differences Across Dimension Membership Groups**

To investigate differences in brain volumetric measures associated with dimension membership, a detailed post-hoc analysis was performed on MUSE features. This analysis aimed to evaluate group-level differences in volumetric measures across four predefined groups: Dimension 1 (D1), Dimension 2 (D2), a combined group representing membership in both D1 and D2, and a group representing neither D1 nor D2.

One-way analysis of variance (ANOVA) was conducted for each MUSE feature to determine whether significant differences existed among the groups. The groups were treated as independent categorical variables, and volumetric measures for each feature were used as dependent variables. To account for the potential inflation of Type I error due to the large number of comparisons performed across all MUSE features, the False Discovery Rate (FDR) correction was applied. The threshold for statistical significance was set at an FDR-adjusted p-value of  $< 0.05$ . Additionally, for each significant feature, the proportion of variance explained by group differences was calculated using eta-squared ( $\eta^2$ ), a measure of effect size. Features with higher  $\eta^2$  values were interpreted as having stronger associations with dimension membership, highlighting their neuroanatomical relevance.

To supplement the statistical analysis, heatmaps were generated to provide a visual summary of group means for all significant MUSE features. To ensure that the heatmaps clearly represented group-level differences without being dominated by variability across features, the data for each feature were normalized. For each feature, the mean volumetric value across all four groups was subtracted from the mean for each group. This step centered the values around zero, removing baseline differences between features. The mean-centered values were divided by the standard deviation of the feature across the four groups. This step standardized the variability across groups, placing all features on a consistent scale where the mean was 0 and the standard deviation was 1.

This normalization ensured that the focus of the heatmaps was on relative differences across groups, rather than absolute volumetric variations between features. Normalized heatmaps used a consistent color scale to visually highlight the magnitude and direction of group-level differences, making patterns more interpretable. In addition to the heatmaps, a summary table was prepared, listing all features with significant group differences, their corresponding FDR-adjusted p-values, and  $\eta^2$  values.



## Supplementary Methods: UKB Items for Cognitive Measures

Following Qureshi et al. (2024), cognitive traits were evaluated through standardized tests, each designed to measure distinct domains of cognitive function. These tests, administered during the Imaging visit (2014+), provided reliable and detailed data on participants' executive function, memory, reasoning, and processing speed. The following section provides a detailed breakdown of these measures and their corresponding UKB codes.

- Executive Function:** Executive function was assessed using the Trail Making Test: Trail A (Data-Field 6348): Participants were required to complete a numeric path, with the duration (in deciseconds) to complete this task reflecting their processing speed and cognitive flexibility. Trail B (Data-Field 6350): This test involved completing an alphanumeric path, providing a more complex measure of executive function. Both tasks are highly sensitive to changes in cognitive flexibility and efficiency.
- Verbal and Numerical Reasoning:** Verbal and numerical reasoning was evaluated using the Fluid Intelligence Test (Data-Field 20016). Participants answered as many questions as possible within a two-minute time limit, providing a measure of reasoning ability and cognitive problem-solving.
- Working Memory:** Working memory was assessed using the Backward Digit Span Task (Data-Field 4282), where participants were asked to recall digits in reverse order. The maximum number of digits correctly remembered reflects short-term memory capacity and cognitive control.
- Processing Speed:** Processing speed was measured through the Symbol Digit Substitution Test (Data-Field 23324). This test required participants to match symbols with corresponding digits within 60 seconds, providing a quantitative measure of complex processing speed.
- Verbal Declarative Memory:** Verbal memory was evaluated using the Paired Associate Learning Test (Data-Field 20197). Participants were tasked with recalling word pairs, with the total number of correct associations reflecting their ability to encode and retrieve verbal information.
- Non-Verbal Reasoning:** Non-verbal reasoning was measured using the Matrix Pattern Completion Test (Data-Field 6373). Participants were required to solve a series of visual puzzles within a three-minute time limit. The number of puzzles correctly solved reflected their ability to process and reason with abstract visual information, independent of language-based skills.

**Supplementary Table 1. Cognitive test measures and UK Biobank codes**

| Domain                         | UKB Category               | Field ID | UKB Description                                                                      | UKB notes                                                                                                                                                                                                                                                        |
|--------------------------------|----------------------------|----------|--------------------------------------------------------------------------------------|------------------------------------------------------------------------------------------------------------------------------------------------------------------------------------------------------------------------------------------------------------------|
| Executive function             | Trail Making               | 6348     | Duration (in deciseconds) to complete numeric path (trail #1)                        | Duration to complete numeric path (trail #1)                                                                                                                                                                                                                     |
|                                | Trail Making               | 6350     | Duration (in deciseconds) to complete alphanumeric path (trail #2)                   | Duration to complete numeric path (trail #2)                                                                                                                                                                                                                     |
| Verbal and numerical reasoning | Cognitive function summary | 20016    | Fluid intelligence score (based on # of questions answered correctly in two minutes) | This is a simple unweighted sum of the number of correct answers given to the 13 fluid intelligence questions. Participants who did not answer all of the questions within the allotted 2-minute limit are scored as zero for each of the unattempted questions. |
| Working memory                 | Numeric memory             | 4282     | Maximum digits remembered correctly                                                  | Longest number correctly recalled during the numeric memory test.                                                                                                                                                                                                |
| Complex processing speed       | Symbol Digit Substitution  | 23324    | Number of symbol digit matches made correctly in 60 seconds                          | This is the number of symbols correctly matched to digits by the participant.                                                                                                                                                                                    |
| Verbal memory                  | Paired Associate Learning  | 20197    | Number of word pairs correctly associated                                            | This is the number of word pairs correctly associated out of ten attempts.                                                                                                                                                                                       |
| Non-verbal memory              | Matrix Pattern Completion  | 6373     | Number of puzzles correctly solved in 3 minutes                                      | This is the number of puzzles for which the participant gave the correct solution.                                                                                                                                                                               |

## Supplementary Methods: UKB Items for Depressive Symptoms

Following Davis et al. (2020) and Howard et al., (2020), lifetime depressive symptoms traits were identified by selecting participants who reported a core symptom of depression persisting for two weeks or more, specifically persistent sadness (Data-Field: 20446) or loss of interest (Data-Field: 20441). A "Yes" response to either Field 20446 or Field 20441 prompted a set of questions evaluating the severity and impact of symptoms during the participant's worst depressive episode. The evaluation of depressive symptoms was based on the Composite International Diagnostic Interview Short Form (CIDI-SF) (Kessler et al., 1998) and was administered in the UK Biobank (UKB) through an online mental health questionnaire completed by 109,049 participants. The answer array for the weight change is "0 Stayed about the same or was on a diet", "1 Gained weight", "2 Lost weight" "3 Both gained and lost some weight during the episode", here the answer of 1, 2 and 3 was re-coded as 1 indicating "Yes".

Based on Thorp et al. (2021), depressive symptoms were extracted using questions derived from the Patient Health Questionnaire-9 (PHQ-9) (Kroenke et al., 2001) depressive symptom fields to evaluate specific aspects of depression in greater detail.

The symptoms were categorized as Yes (1) to indicate the presence of the symptom, or No (0) to denote its absence. The response options for the PHQ-9 questions were: 1, Not at all; 2, Several days; 3, More than half the days; 4, Nearly every day. A response of 1 was recoded as 0, indicating that the symptom was not present, while responses of 2, 3, or 4 were recoded as 1 to indicate the presence of anxiety-related symptoms. These data fields were recorded for consistency in the analysis, ensuring a robust examination of depressive symptoms across core and non-core dimensions, as well as the additional PHQ-9 indicators.

The table below summarizes the depressive symptoms and their corresponding UKB data fields, highlighting their categorization into core symptoms, non-core symptoms, and PHQ-9 depressive symptoms. These traits were assessed with the mental well-being questionnaire that was sent to participants to complete in 2017.

**Supplementary Table 2. Depressive Symptoms Measures and UK Biobank codes**

| Trait                                                 | Field ID | UKB Description                                             | Mental well-being online questionnaire question (2017)                                                                                                                  |
|-------------------------------------------------------|----------|-------------------------------------------------------------|-------------------------------------------------------------------------------------------------------------------------------------------------------------------------|
| Ever had Core Depressive Symptoms                     | 20446    | Persistent sadness                                          | Have you ever had a time in your life when you felt sad, blue, or depressed for two weeks or more in a row?                                                             |
|                                                       | 20441    | Loss of interest                                            | Have you ever had a time in your life lasting two weeks or more when you lost interest in most things like hobbies, work, or activities that usually give you pleasure? |
| Depressive Symptoms During worst period of depression | 20449    | Feelings of tiredness during worst episode of depression    | Did you feel more tired out or low on energy than is usual for you?                                                                                                     |
|                                                       | 20532    | Changes in sleep patterns                                   | Did your sleep change?                                                                                                                                                  |
|                                                       | 20435    | Difficulty concentrating during worst depression            | Did you have a lot more trouble concentrating than usual?                                                                                                               |
|                                                       | 20450    | Feelings of worthlessness during worst period of depression | People sometimes feel down on themselves, no good, worthless. Did you feel this way?                                                                                    |
|                                                       | 20437    | Thoughts of death during worst depression                   | Did you think a lot about death - either your own, someone else's or death in general?                                                                                  |
|                                                       | 20536    | Weight change during worst depression                       | Did you gain or lose weight without trying, or did you stay about the same weight?                                                                                      |
| Patient Health Questionnaire-9 (PHQ-9)                |          |                                                             | <i>Over the last 2 weeks, how often have you been bothered by any of the following problems?</i>                                                                        |
|                                                       | 20514    | Recent lack of interest or pleasure in doing things         | Little interest or pleasure in doing things                                                                                                                             |
|                                                       | 20511    | Recent poor appetite or overeating                          | Poor appetite or overeating                                                                                                                                             |
|                                                       | 20508    | Recent trouble concentrating on things                      | Trouble concentrating on things, such as reading the newspaper or watching television                                                                                   |
|                                                       | 20510    | Recent feelings of depression                               | Feeling down, depressed, or hopeless                                                                                                                                    |

|       |                                                         |                                                                                                                                                                          |
|-------|---------------------------------------------------------|--------------------------------------------------------------------------------------------------------------------------------------------------------------------------|
| 20519 | Recent feelings of tiredness or low energy              | Feeling tired or having little energy                                                                                                                                    |
| 20507 | Recent feelings of inadequacy                           | Feeling bad about yourself or that you are a failure or have let yourself or your family down                                                                            |
| 20518 | Recent changes in speed/amount of moving or speaking    | Moving or speaking so slowly that other people could have noticed? Or the opposite - being so fidgety or restless that you have been moving around a lot more than usual |
| 20517 | Trouble falling or staying asleep, or sleeping too much | Trouble falling or staying asleep, or sleeping too much                                                                                                                  |
| 20513 | Recent thoughts of suicide or self-harm                 | Thoughts that you would be better off dead or of hurting yourself in some way                                                                                            |

### Supplementary Methods: UKB Items for Anxiety-Related Traits

Following Thorp et al. (2021), anxiety-related traits were selected based on the Generalized Anxiety Disorder-7 (GAD-7) scale (Spitzer et al., 2006), using UKB data fields. The responses for these traits were: 1, Not at all; 2, Several days; 3, More than half the days; 4, Nearly every day. A response of 1 was recoded as 0, indicating that the symptom was not present, while responses of 2, 3, or 4 were recoded as 1 to indicate the presence of anxiety-related symptoms.

These traits were assessed with the mental well-being questionnaire that was sent to participants to complete in 2017. The table below provides a summary of the anxiety traits and their associated UKB data field ID:

**Supplementary Table 3. Anxiety-related Measures and UK Biobank codes**

| Field ID | UKB Description                                 | Mental well-being online questionnaire question (2017)                                           |
|----------|-------------------------------------------------|--------------------------------------------------------------------------------------------------|
|          |                                                 | <i>Over the last 2 weeks, how often have you been bothered by any of the following problems?</i> |
| 20506    | Recent feelings or nervousness or anxiety       | Feeling nervous, anxious or on edge                                                              |
| 20512    | Recent feelings of foreboding                   | Feeling afraid as if something awful might happen                                                |
| 20505    | Recent easy annoyance or irritability           | Becoming easily annoyed or irritable                                                             |
| 20516    | Recent restlessness                             | Being so restless that it is hard to sit still                                                   |
| 20515    | Recent trouble relaxing                         | Trouble relaxing                                                                                 |
| 20520    | Recent worrying too much about different things | Worrying too much about different things                                                         |
| 20509    | Recent inability to stop or control worrying    | Not being able to stop or control worrying                                                       |

## Supplementary Methods: UKB Items for Neuroticism-Related Traits

Traits related to neuroticism and depressive symptoms, as categorized by the UK Biobank (UKB). Neuroticism-related items were derived from the Eysenck Personality Inventory framework (Eysenck & Eysenck, 1975) and assigned individual codes within the UKB dataset. These traits align with the approach outlined in the study by Okbay et al. (2016). The table below summarizes the neuroticism traits, their UKB field ID, UKB description and the corresponding questions. Response options were “No”, coded as 0, and “yes”, coded as 1. Responses were collected at the initial imaging visit (instance 2) from 2014 onwards.

**Supplementary Table 4. Neuroticism Measures and UK Biobank codes**

| Field ID | UKB Description                    | ACE touchscreen question                                |
|----------|------------------------------------|---------------------------------------------------------|
| 1920     | Mood swings                        | Does your mood often go up and down?                    |
| 1930     | Miserableness                      | Do you ever feel 'just miserable' for no reason?        |
| 1940     | Irritability                       | Are you an irritable person?                            |
| 1950     | Sensitivity / hurt feelings        | Are your feelings easily hurt?                          |
| 1960     | Fed-up feelings                    | Do you often feel 'fed-up'?                             |
| 1970     | Nervous feelings                   | Would you call yourself a nervous person?               |
| 1980     | Worrier / anxious feelings         | Are you a worrier?                                      |
| 1990     | Tense / 'highly strung'            | Would you call yourself tense or 'highly strung'?       |
| 2000     | Worry too long after embarrassment | Do you worry too long after an embarrassing experience? |
| 2010     | Suffer from 'nerves'               | Do you suffer from 'nerves'?                            |
| 2020     | Loneliness, isolation              | Do you often feel lonely?                               |
| 2030     | Guilt Feelings                     | Are you often troubled by feelings of guilt?            |

### **Supplementary Methods: UKB Items for adverse life events**

The adverse life event traits included in this analysis are based on UK Biobank (UKB) data fields following Holmes et al (2016), covering experiences of violence, abuse, and neglect across different stages of life. These traits are identified by specific UKB codes. For instance, participants were asked if they had experienced a violent or sexual assault (UKB Code: 29086) with response options including "No, never," "Yes, but not in the last 12 months," or "Yes, within the last 12 months". Both "Yes, but not in the last 12 months" and "Yes, within the last 12 months" were coded as 1 to indicate the presence of history of Adverse life events or abuse. Other traits assessed included physical violence, sexual interference, or lack of consent involving a partner or ex-partner, as well as experiences of being stopped from seeing friends or family. Childhood adverse life events was also evaluated, including feeling hated by a family member (UKB Code: 29078), being physically abused by family (UKB Code: 29077), or sexually molested as a child (UKB Code: 29079). Childhood adverse life events were had response options including "never", coded and 0, and "rarely true", "sometimes true", "often true" and "very often true" which were recoded as 1 to indicate the presence of historic events. Adverse life events questionnaires were recorded using the Mental Wellbeing Questionnaire that was emailed to all UKB participants in 2023. These traits capture a broad spectrum of Adverse life events-related experiences and provide insights into participants' life events.



**Supplementary Table 5. Adverse Life Events measures and UK Biobank codes**

| Field ID | UKB Description                                                            | Mental well-being online questionnaire question (2023)                                                                                                                                                                                                                                                   |
|----------|----------------------------------------------------------------------------|----------------------------------------------------------------------------------------------------------------------------------------------------------------------------------------------------------------------------------------------------------------------------------------------------------|
| 29086    | Experienced a violent or sexual assault                                    | Since you were sixteen, have you experienced: a violent or sexual assault?                                                                                                                                                                                                                               |
| 29083    | Physical violence by partner or ex-partner as an adult                     | Since you were sixteen, has a partner or ex-partner (by partner we mean any boyfriend or girlfriend as well as a husband, wife or civil partner): pushed you, held or pinned you down, slapped you, kicked, bitten or hit you (with a fist or something else), or thrown something at you that hurt you? |
| 29081    | Stopped from seeing friends or family by partner or ex-partner as an adult | Since you were sixteen, has a partner or ex-partner (by partner we mean any boyfriend or girlfriend as well as a husband, wife or civil partner): stopped you from seeing friends and relatives?                                                                                                         |
| 29085    | Sexual intercourse by partner or ex-partner without consent as an adult    | Since you were sixteen, has a partner or ex-partner (by partner we mean any boyfriend or girlfriend as well as a husband, wife or civil partner): engaged in sexual intercourse with you without your consent?                                                                                           |
| 29084    | Sexual interference by partner or ex-partner without consent as an adult   | Since you were sixteen, has a partner or ex-partner (by partner we mean any boyfriend or girlfriend as well as a husband, wife or civil partner): touched you, or got you to touch them, in a sexual way without your consent?                                                                           |
| 29078    | Felt hated by family member as a child                                     | When I was growing up: I felt that someone in my family hated me                                                                                                                                                                                                                                         |
| 29079    | Sexually molested as a child                                               | When I was growing up: Someone molested me (sexually).                                                                                                                                                                                                                                                   |
| 29077    | Physically abused by family as a child                                     | When I was growing up: People in my family hit me so hard that it left me with bruises or marks.                                                                                                                                                                                                         |

## Supplementary Methods: UKB Items for Self-Harm

Self-harm traits were analysed using data from the UKB following Zhang et al. (2024). This included the evaluation of self-harm and suicide attempts, captured under two distinct UKB data fields: 20480 (Ever self-harmed) and 29116 (Ever attempted suicide). Participants' responses were categorised as "Yes" (1) to indicate the presence of self-harm or suicide attempts, and "No" (0) to denote their absence.

The table below summaries the self-harm traits and their corresponding UKB data fields:

**Supplementary Table 6. Self-harm behaviors measures and UK Biobank codes**

| Field ID | UKB Description        | Mental well-being online questionnaire question                                   | Assessment timepoint |
|----------|------------------------|-----------------------------------------------------------------------------------|----------------------|
| 20480    | Ever self-harmed       | Have you deliberately harmed yourself, whether or not you meant to end your life? | 2017                 |
| 29116    | Ever attempted suicide | Have you harmed yourself with the intention of ending your life?                  | 2023                 |

**Supplementary Methods: UKB Items for lifestyle factors**

The analysis incorporated several lifestyle factors recorded in the UK Biobank (UKB) that were significantly associated with suicide attempts in Zhang et al. (2024), covering behaviors and habits related to sexual activity, smoking, alcohol consumption, diet, and sleep. The assessments for these traits were conducted during the Imaging visit (2014+). Participant responses were categorized based on predefined answer arrays where applicable. Below is a summary of the traits and their corresponding data fields:

**Supplementary Table 7. Lifestyle factors measures and UK Biobank codes**

| Field ID | UKB Description                        | ACE touchscreen question                                                                                                 | Answer Arrays                                                                                                                                                                                                                                                                                                        |
|----------|----------------------------------------|--------------------------------------------------------------------------------------------------------------------------|----------------------------------------------------------------------------------------------------------------------------------------------------------------------------------------------------------------------------------------------------------------------------------------------------------------------|
| 2139     | Age first had sexual intercourse       | What was your age when you first had sexual intercourse? (Sexual intercourse includes vaginal, oral or anal intercourse) | Enter number. Special responses: -2 = "Never had sex", -3 = "Prefer not to answer", -1 = "Do not know"                                                                                                                                                                                                               |
| 20160    | Ever smoked                            | Do you smoke tobacco now?<br>In the past, how often have you smoked tobacco?                                             | Individual classed as Ever smoker (1) if Current tobacco smoking = most days (1) or occasionally (2) OR Past tobacco smoking = most days (1) or occasionally (2) or tried once or twice (3).<br>Individual were classed as Never smoker (0) if Current tobacco smoking = no (0) AND Past tobacco smoking = never (4) |
| 1239     | Current tobacco smoking                | Do you smoke tobacco now?                                                                                                | 1, Yes, on most or all days; 2, Only occasionally 0, No                                                                                                                                                                                                                                                              |
| 1618     | Alcohol usually taken with meals       | When you drink alcohol, is it usually with meals?                                                                        | Yes (1) / No (0)                                                                                                                                                                                                                                                                                                     |
| 2149     | Lifetime number of sexual partners     | About how many sexual partners have you had in your lifetime?                                                            | Enter number. Special responses: -1 = "Do not know", -3 = "Prefer not to answer"                                                                                                                                                                                                                                     |
| 1200     | Sleeplessness / insomnia               | Do you have trouble falling asleep at night or do you wake up in the middle of the night?                                | 1, Never/rarely; 2, Sometimes; 3, Usually<br>Prefer not to answer                                                                                                                                                                                                                                                    |
| 20116    | Smoking status                         | This field summarises the current/past smoking status of the participant.                                                | 1, Never; 2, Previous; 3, Current<br>Prefer not to answer                                                                                                                                                                                                                                                            |
| 1190     | Nap during the day                     | Do you have a nap during the day?                                                                                        | 1, Never/rarely; 2, Sometimes; 3, Usually<br>Prefer not to answer                                                                                                                                                                                                                                                    |
| 1478     | Salt added to food                     | Do you add salt to your food? (Do not include salt used in cooking)                                                      | 1, Never/rarely; 2, Sometimes; 3, Usually; 4, Always<br>Prefer not to answer                                                                                                                                                                                                                                         |
| 1458     | Cereal intake                          | How many bowls of cereal do you eat a WEEK?                                                                              | Enter number. -10 = "Less than one", -1 = "Do not know", -3 = "Prefer not to answer"                                                                                                                                                                                                                                 |
| 1279     | Exposure to tobacco smoke outside home | Outside of your home, about how many hours per WEEK are you exposed to other people's tobacco smoke?                     | Enter number. -1 = "Do not know", -3 = "Prefer not to answer"                                                                                                                                                                                                                                                        |

## Supplementary Methods: UKB Items for Metabolic Measures

Following significant findings from Amin et al. (2023) and Mao et al. (2024) the analysis included various metabolites measured in the UK Biobank (UKB) dataset, reflecting metabolic processes, lipid profiles, blood cell counts, and other health indicators. These traits provide insights into key biological markers relevant to respiratory health, cardiovascular measures, lipid metabolism, and inflammation. These traits were assessed during the UKB's Initial assessment visit (2006-2010).

**Supplementary Table 8. Metabolic Measures and UK Biobank codes**

| Field ID | UKB Description                                                  | UKB Note                                                                                                                                                          |
|----------|------------------------------------------------------------------|-------------------------------------------------------------------------------------------------------------------------------------------------------------------|
| 3063     | Forced expiratory volume in 1-second (FEV1)                      | FEV1 value calculated from blow                                                                                                                                   |
| 4080     | Systolic blood pressure, automated reading                       | Blood pressure, automated reading, systolic. Two measures of blood pressure were taken a few moments apart.                                                       |
| 30750    | Glycated haemoglobin (HbA1c)                                     | Measured by HPLC analysis on a Bio-Rad VARIANT II Turbo                                                                                                           |
| 30690    | TC, total cholesterol                                            | Measured by CHO-POD analysis on a Beckman Coulter AU5800                                                                                                          |
| 30000    | White blood cell (leukocyte) count                               | White blood count is the number of leukocytes.                                                                                                                    |
| 30270    | Mean cell volume (MCV)                                           | Mean Sphered Cells Volume                                                                                                                                         |
| 30180    | Lymphocyte ratio                                                 | White blood count is the number of leukocytes.                                                                                                                    |
| 30740    | Glucose                                                          | Measured by hexokinase analysis on a Beckman Coulter AU5800                                                                                                       |
| 30600    | Albumin                                                          | Measured by BCG analysis on a Beckman Coulter AU5800                                                                                                              |
| 30610    | Alkaline phosphatase (ALP)                                       | Measured by AMP(IFCC) analysis on a Beckman Coulter AU5800                                                                                                        |
| 30710    | C-reactive protein (CRP)                                         | Measured by immunoturbidimetric - high sensitivity analysis on a Beckman Coulter AU5800                                                                           |
| 23447    | Monounsaturated Fatty Acids                                      | Monounsaturated Fatty Acids from Nightingale Health data. Biomarker group: Fatty acids                                                                            |
| 23452    | Omega-6 Fatty Acids to Total Fatty Acids percentage              | Percentage of Omega-6 Fatty Acids to Total Fatty Acids from Nightingale Health data. Biomarker group: Fatty acids, Biomarker sub-group: Fatty acid ratios         |
| 23453    | Polyunsaturated Fatty Acids to Total Fatty Acids percentage      | Percentage of Polyunsaturated Fatty Acids to Total Fatty Acids from Nightingale Health data. Biomarker group: Fatty acids, Biomarker sub-group: Fatty acid ratios |
| 23454    | Monounsaturated Fatty Acids to Total Fatty Acids percentage      | Percentage of Polyunsaturated Fatty Acids to Total Fatty Acids from Nightingale Health data. Biomarker group: Fatty acids, Biomarker sub-group: Fatty acid ratios |
| 23456    | Linoleic Acid to Total Fatty Acids percentage                    | Percentage of Linoleic Acid to Total Fatty Acids from Nightingale Health data. Biomarker group: Fatty acids, Biomarker sub-group: Fatty acid ratios               |
| 23481    | Concentration of Chylomicrons and Extremely Large VLDL Particles | Biomarker subgroup: Chylomicrons and extremely large VLDL (particle diameters from 75 nm upwards)                                                                 |
| 23482    | Total Lipids in Chylomicrons and Extremely Large VLDL            | Biomarker subgroup: Chylomicrons and extremely large VLDL (particle diameters from 75 nm upwards)                                                                 |

---

|       |                                                             |                                                                                                   |
|-------|-------------------------------------------------------------|---------------------------------------------------------------------------------------------------|
| 23483 | Phospholipids in Chylomicrons and Extremely Large VLDL      | Biomarker subgroup: Chylomicrons and extremely large VLDL (particle diameters from 75 nm upwards) |
| 23484 | Cholesterol in Chylomicrons and Extremely Large VLDL        | Biomarker subgroup: Chylomicrons and extremely large VLDL (particle diameters from 75 nm upwards) |
| 23485 | Cholesteryl Esters in Chylomicrons and Extremely Large VLDL | Biomarker subgroup: Chylomicrons and extremely large VLDL (particle diameters from 75 nm upwards) |
| 23486 | Free Cholesterol in Chylomicrons and Extremely Large VLDL   | Biomarker subgroup: Chylomicrons and extremely large VLDL (particle diameters from 75 nm upwards) |
| 23487 | Triglycerides in Chylomicrons and Extremely Large VLDL      | Biomarker subgroup: Chylomicrons and extremely large VLDL (particle diameters from 75 nm upwards) |
| 23488 | Concentration of Very Large VLDL Particles                  | Biomarker subgroup: Very large VLDL (average diameter 64 nm)                                      |
| 23489 | Total Lipids in Very Large VLDL                             | Biomarker subgroup: Very large VLDL (average diameter 64 nm)                                      |
| 23490 | Phospholipids in Very Large VLDL                            | Biomarker subgroup: Very large VLDL (average diameter 64 nm)                                      |
| 23491 | Cholesterol in Very Large VLDL                              | Biomarker subgroup: Very large VLDL (average diameter 64 nm)                                      |
| 23492 | Cholesteryl Esters in Very Large VLDL                       | Biomarker subgroup: Very large VLDL (average diameter 64 nm)                                      |
| 23493 | Free Cholesterol in Very Large VLDL                         | Biomarker subgroup: Very large VLDL (average diameter 64 nm)                                      |
| 23494 | Triglycerides in Very Large VLDL                            | Biomarker subgroup: Very large VLDL (average diameter 64 nm)                                      |
| 23495 | Concentration of Large VLDL Particles                       | Biomarker subgroup: Large VLDL (average diameter 53.6 nm)                                         |
| 23496 | Total Lipids in Large VLDL                                  | Biomarker subgroup: Large VLDL (average diameter 53.6 nm)                                         |
| 23497 | Phospholipids in Large VLDL                                 | Biomarker subgroup: Large VLDL (average diameter 53.6 nm)                                         |
| 23498 | Cholesterol in Large VLDL                                   | Biomarker subgroup: Large VLDL (average diameter 53.6 nm)                                         |
| 23499 | Cholesteryl Esters in Large VLDL                            | Biomarker subgroup: Large VLDL (average diameter 53.6 nm)                                         |
| 23500 | Free Cholesterol in Large VLDL                              | Biomarker subgroup: Large VLDL (average diameter 53.6 nm)                                         |
| 23501 | Triglycerides in Large VLDL                                 | Biomarker subgroup: Large VLDL (average diameter 53.6 nm)                                         |
| 23503 | Total Lipids in Medium VLDL                                 | Biomarker subgroup: Medium VLDL (average diameter 44.5 nm)                                        |
| 23508 | Triglycerides in Medium VLDL                                | Biomarker subgroup: Medium VLDL (average diameter 44.5 nm)                                        |
| 23509 | Concentration of Small VLDL Particles                       | Biomarker subgroup: Small VLDL (average diameter 36.8 nm)                                         |
| 23510 | Total Lipids in Small VLDL                                  | Biomarker subgroup: Small VLDL (average diameter 36.8 nm)                                         |
| 23515 | Triglycerides in Small VLDL                                 | Biomarker subgroup: Small VLDL (average diameter 36.8 nm)                                         |
| 23522 | Triglycerides in Very Small VLDL                            | Biomarker subgroup: Very small VLDL (average diameter 31.3 nm)                                    |
| 23524 | Total Lipids in IDL                                         | Biomarker subgroup: IDL (average diameter 28.6 nm)                                                |
| 23526 | Cholesterol in IDL                                          | Biomarker subgroup: IDL (average diameter 28.6 nm)                                                |
| 23527 | Cholesteryl Esters in IDL                                   | Biomarker subgroup: IDL (average diameter 28.6 nm)                                                |
| 23528 | Free Cholesterol in IDL                                     | Biomarker subgroup: IDL (average diameter 28.6 nm)                                                |
| 23529 | Triglycerides in IDL                                        | Biomarker subgroup: IDL (average diameter 28.6 nm)                                                |
| 23551 | Concentration of Very Large HDL Particles                   | Biomarker subgroup: Very large HDL (average diameter 14.3 nm)                                     |
| 23552 | Total Lipids in Very Large HDL                              | Biomarker subgroup: Very large HDL (average diameter 14.3 nm)                                     |
| 23553 | Phospholipids in Very Large HDL                             | Biomarker subgroup: Very large HDL (average diameter 14.3 nm)                                     |
| 23554 | Cholesterol in Very Large HDL                               | Biomarker subgroup: Very large HDL (average diameter 14.3 nm)                                     |

---

---

|       |                                       |                                                                                                  |
|-------|---------------------------------------|--------------------------------------------------------------------------------------------------|
| 23555 | Cholesteryl Esters in Very Large HDL  | Biomarker subgroup: Very large HDL (average diameter 14.3 nm)                                    |
| 23556 | Free Cholesterol in Very Large HDL    | Biomarker subgroup: Very large HDL (average diameter 14.3 nm)                                    |
| 23558 | Concentration of Large HDL Particles  | Biomarker subgroup: Large HDL (average diameter 12.1 nm)                                         |
| 23559 | Total Lipids in Large HDL             | Biomarker subgroup: Large HDL (average diameter 12.1 nm)                                         |
| 23560 | Phospholipids in Large HDL            | Biomarker subgroup: Large HDL (average diameter 12.1 nm)                                         |
| 23561 | Cholesterol in Large HDL              | Biomarker subgroup: Large HDL (average diameter 12.1 nm)                                         |
| 23562 | Cholesteryl Esters in Large HDL       | Biomarker subgroup: Large HDL (average diameter 12.1 nm)                                         |
| 23563 | Free Cholesterol in Large HDL         | Biomarker subgroup: Large HDL (average diameter 12.1 nm)                                         |
| 23565 | Concentration of Medium HDL Particles | Biomarker subgroup: Medium HDL (average diameter 10.9 nm)                                        |
| 23568 | Cholesterol in Medium HDL             | Biomarker subgroup: Medium HDL (average diameter 10.9 nm)                                        |
| 23569 | Cholesteryl Esters in Medium HDL      | Biomarker subgroup: Medium HDL (average diameter 10.9 nm)                                        |
| 23570 | Free Cholesterol in Medium HDL        | Biomarker subgroup: Medium HDL (average diameter 10.9 nm)                                        |
| 23571 | Triglycerides in Medium HDL           | Biomarker subgroup: Medium HDL (average diameter 10.9 nm)                                        |
| 23578 | Triglycerides in Small HDL            | Biomarker group: Lipoprotein subclasses, Biomarker subgroup: Small HDL (average diameter 8.7 nm) |
| 23472 | Pyruvate                              | Biomarker group: Glycolysis related metabolites                                                  |
| 23473 | Citrate                               | Biomarker group: Glycolysis related metabolites                                                  |

---

## Supplementary Methods: UKB Items for Physical Measures

Following significant results from Zhang et al. (2024) this analysis includes a variety of physical measures obtained from the UK Biobank (UKB) dataset, providing detailed insights into body composition, strength, and fat distribution across different regions of the body. These traits were assessed during the Imaging visit (2014+).

The table below summarizes the physical measures and their corresponding UKB data fields:

**Supplementary Table 9. Physical Measures and UK Biobank codes**

| Field ID | UKB Description            | UKB Note                                                                        |
|----------|----------------------------|---------------------------------------------------------------------------------|
| 23111    | Leg fat percentage (right) | Body composition estimation by impedance measurement. Right leg fat percentages |
| 23115    | Leg fat percentage (left)  | Body composition estimation by impedance measurement. Left leg fat percentage   |
| 23104    | Body mass index (BMI)      | Body composition estimation by impedance measurement. Body Mass Index.          |
| 47       | Hand grip strength (right) | Right grip strength.                                                            |
| 23099    | Body fat percentage        | Body composition estimation by impedance measurement. Body fat percentage       |
| 23123    | Arm fat percentage (left)  | Body composition estimation by impedance measurement. Left arm fat percentage   |
| 46       | Hand grip strength (left)  | Left grip strength.                                                             |
| 23127    | Trunk fat percentage       | Body composition estimation by impedance measurement. Trunk fat percentages     |
| 23112    | Leg fat mass (right)       | Body composition estimation by impedance measurement. Right leg fat mass (Kg)   |
| 23119    | Arm fat percentage (right) | Body composition estimation by impedance measurement. Right arm fat percentage  |
| 23120    | Arm fat mass (right)       | Body composition estimation by impedance measurement. Right arm fat mass (Kg)   |
| 23129    | Trunk fat-free mass        | Body composition estimation by impedance measurement. Trunk fat free mass (Kg)  |
| 23124    | Arm fat mass (left)        | Body composition estimation by impedance measurement. Left arm fat mass (Kg)    |
| 23130    | Trunk predicted mass       | Body composition estimation by impedance measurement. Trunk predicted mass (Kg) |
| 23116    | Leg fat mass (left)        | Body composition estimation by impedance measurement. Left leg fat mass (kg)    |



## **Supplementary Methods: Genetic analysis**

### **Genetic preprocessing protocol (Hwang et al., 2023)**

Participants with second-degree familial relationships were identified and excluded using KING software for relationship inference (Manichaikul et al., 2010). Additionally, individuals with mismatched genetically identified sex and self-reported sex, as well as those with chromosome aneuploidy, were removed from the dataset. Duplicate variants were excluded, along with variants exhibiting a minor allele frequency (MAF) below 1%, a missing genotype rate above 3%, or failing the Hardy-Weinberg equilibrium test. Participants with more than 3% missing genotypes were also excluded to maintain high data quality.

To address population stratification, the first 40 principal components (PCs) were calculated using PLINK 2 (v2.0.0) (Purcell et al., 2007). After completing these quality control steps, the final dataset comprised 30,376 samples and 6,288,959 variants from UK Biobank participants of European ancestry, which were used for genome-wide association studies (GWAS).

### **Categorization of Genetic Variants in FUMA (Hwang et al., 2023)**

FUMA (Functional Mapping and Annotation) categorizes genetic variants into independent significant SNVs, lead SNVs, candidate SNVs, and genomic risk loci, streamlining post-GWAS annotation processes by integrating data from various biological resources (Watanabe et al., 2017). Independent significant SNVs are defined as variants with a p-value  $\leq 5 \times 10^{-8}$ , independent at a user-defined  $r^2$  threshold (e.g., 0.6). Candidate SNVs are those in linkage disequilibrium (LD) with these significant SNVs, and FUMA uses the GWAS Catalog to identify clinical traits associated with them.

Lead SNVs, in contrast, are independent significant SNVs uncorrelated at  $r^2 < 0.1$ . Among correlated variants ( $r^2 \geq 0.1$ ), the lead SNV is determined by the lowest p-value. FUMA recommends setting an  $r^2$  threshold of 0.6 or higher for more precise differentiation. Variants without prior clinical associations are classified as novel lead SNVs.

Genomic risk loci encompass clusters of independent signals within a defined distance (e.g., 250 kilobases). These loci consolidate variants correlated at  $r^2 \geq 0.1$  and are represented by the variant with the lowest p-value. FUMA's integrative approach allows researchers to identify and prioritize functional variants using positional, expression quantitative trait loci (eQTL), and chromatin interaction mapping, with optional filtering based on functional scores such as CADD or RegulomeDB.

## Supplementary Methods: Presentation of statistics (Junhao et al., 2022)

We summarize the statistics used in the paper:

1. The HYDRA model was used to identify two neuroanatomical dimensions (D1, D2) in first-episode and recurrent MDD based on z-scored brain ROIs, with  $k=2$  selected as the optimal number of clusters using the Adjusted Rand Index (ARI). Dimension scores and memberships for the UK Biobank cohort were computed based on thresholds for expression scores (E1, E2), defining D1, D2, combined, and neither groups.

To evaluate brain volumetric differences, one-way ANOVA were conducted across the groups, with significance determined by FDR correction ( $p < 0.05$ ), and group means along with explained variance for each MUSE feature were reported.

2. For group comparisons in cognitive assessments, general linear models adjusted for age, sex, and dimension membership (D1, D2) were applied to standardised scores, with effect sizes represented as beta coefficients. False Discovery Rate (FDR) correction was applied to set a significance threshold of  $p < 0.05$ . For group comparisons in emotional, psychological, and behavioural traits, Chi-Square tests were used to compare binary variables between dimensions, with effect sizes (Cramér's V) and response patterns (standardised residuals) summarised. For group comparisons in metabolomic data, standardised measures were analysed using beta coefficients to reflect group differences, with positive coefficients indicating higher scores in D2 and negative coefficients indicating higher scores in D1.

3. For GWAS analysis, we set the P-value threshold to be  $5 \times 10^{-8}$ , which is a strict threshold in genome-wide analyses.

**Supplementary Table 10. Research Domain Criteria (RDoC) assessment items and criteria thresholds**

| RDoC/phenotype                          |                                           | HAMD                                                                                                                                          | MADRS                                                                                   |
|-----------------------------------------|-------------------------------------------|-----------------------------------------------------------------------------------------------------------------------------------------------|-----------------------------------------------------------------------------------------|
| <b>Citrome et al. (2022)</b>            |                                           |                                                                                                                                               |                                                                                         |
| Negative Valance Systems                | Items                                     | #1 depressed mood<br>#10 anxiety psychic<br>#11 anxiety somatic<br>#15 hypochondriasis                                                        | #1 apparent sadness<br>#2 reported sadness<br>#3 inner tension<br>#10 suicidal thoughts |
|                                         | Maximum total score                       | 16                                                                                                                                            | 24                                                                                      |
| Positive Valance Systems                | Items                                     | #7 Work and activities<br>#14 genital symptoms                                                                                                | #8 inability to feel                                                                    |
|                                         | Maximum total score                       | 6                                                                                                                                             | 6                                                                                       |
| Cognitive Systems                       | Items                                     | #2 feelings of guilt                                                                                                                          | #6 concentration difficulties                                                           |
|                                         | Maximum total score                       | 4                                                                                                                                             | 6                                                                                       |
| Arousal/Regulatory Systems              | Items                                     | #4 insomnia early night<br>#5 insomnia middle night<br>#6 insomnia early morning<br>#9 agitation<br>#15 hypochondriasis<br>#16 loss of weight | #4 reduced sleep<br>#5 reduced appetite                                                 |
|                                         | Maximum total score                       | 22                                                                                                                                            | 12                                                                                      |
| Sensorimotor Systems                    | Items                                     | #8 retardation<br>#15 hypochondriasis                                                                                                         | #7 lassitude                                                                            |
|                                         | Maximum total score                       | 8                                                                                                                                             | 6                                                                                       |
| <b>Ahmed et al. (2018)</b>              |                                           |                                                                                                                                               |                                                                                         |
| Core Depression                         | Items                                     | #1 depressed mood<br>#7 work and activities                                                                                                   | #1 apparent sadness<br>#2 reported sadness<br>#8 inability to feel                      |
|                                         | Maximum total score<br>Phenotype criteria | 8<br>Score of 3 or 4 on both items                                                                                                            | 18<br>Score of 2 or more on item #1 and a score of 4 or more on items #2 and #8         |
| Anxiety                                 | Items                                     | #9 agitation<br>#10 anxiety psychic<br>#11 anxiety somatic<br>#15 hypochondriasis                                                             | #3 inner tension                                                                        |
|                                         | Maximum total score<br>Phenotype criteria | 16<br>A score of 6 or more across all items                                                                                                   | 6<br>a score of 4 or more on item #.3                                                   |
| Neurovegetative symptoms of melancholia | Items                                     | #6 insomnia early morning<br>#12 somatic gastrointestinal                                                                                     | #4 reduced sleep<br>#5 reduced appetite                                                 |
|                                         | Maximum total score<br>Phenotype criteria | 6<br>Score of 1 or more on both items.                                                                                                        | 12<br>Score of 3 or more on both items.                                                 |

RDoC, Research Domain Criteria; HAMD, Hamilton Depression Rating Scale; MADRS, Montgomery Åsberg Depression Rating Scale. HAMD item 17 (insight) was excluded from cognitive systems due to score of 0 for 98% of participants.

**Supplementary Figure 1. Heatmaps of group means for all significant MUSE features.** Normalized heatmaps used a consistent color scale to visually highlight the magnitude and direction of group-level differences, making patterns more interpretable.

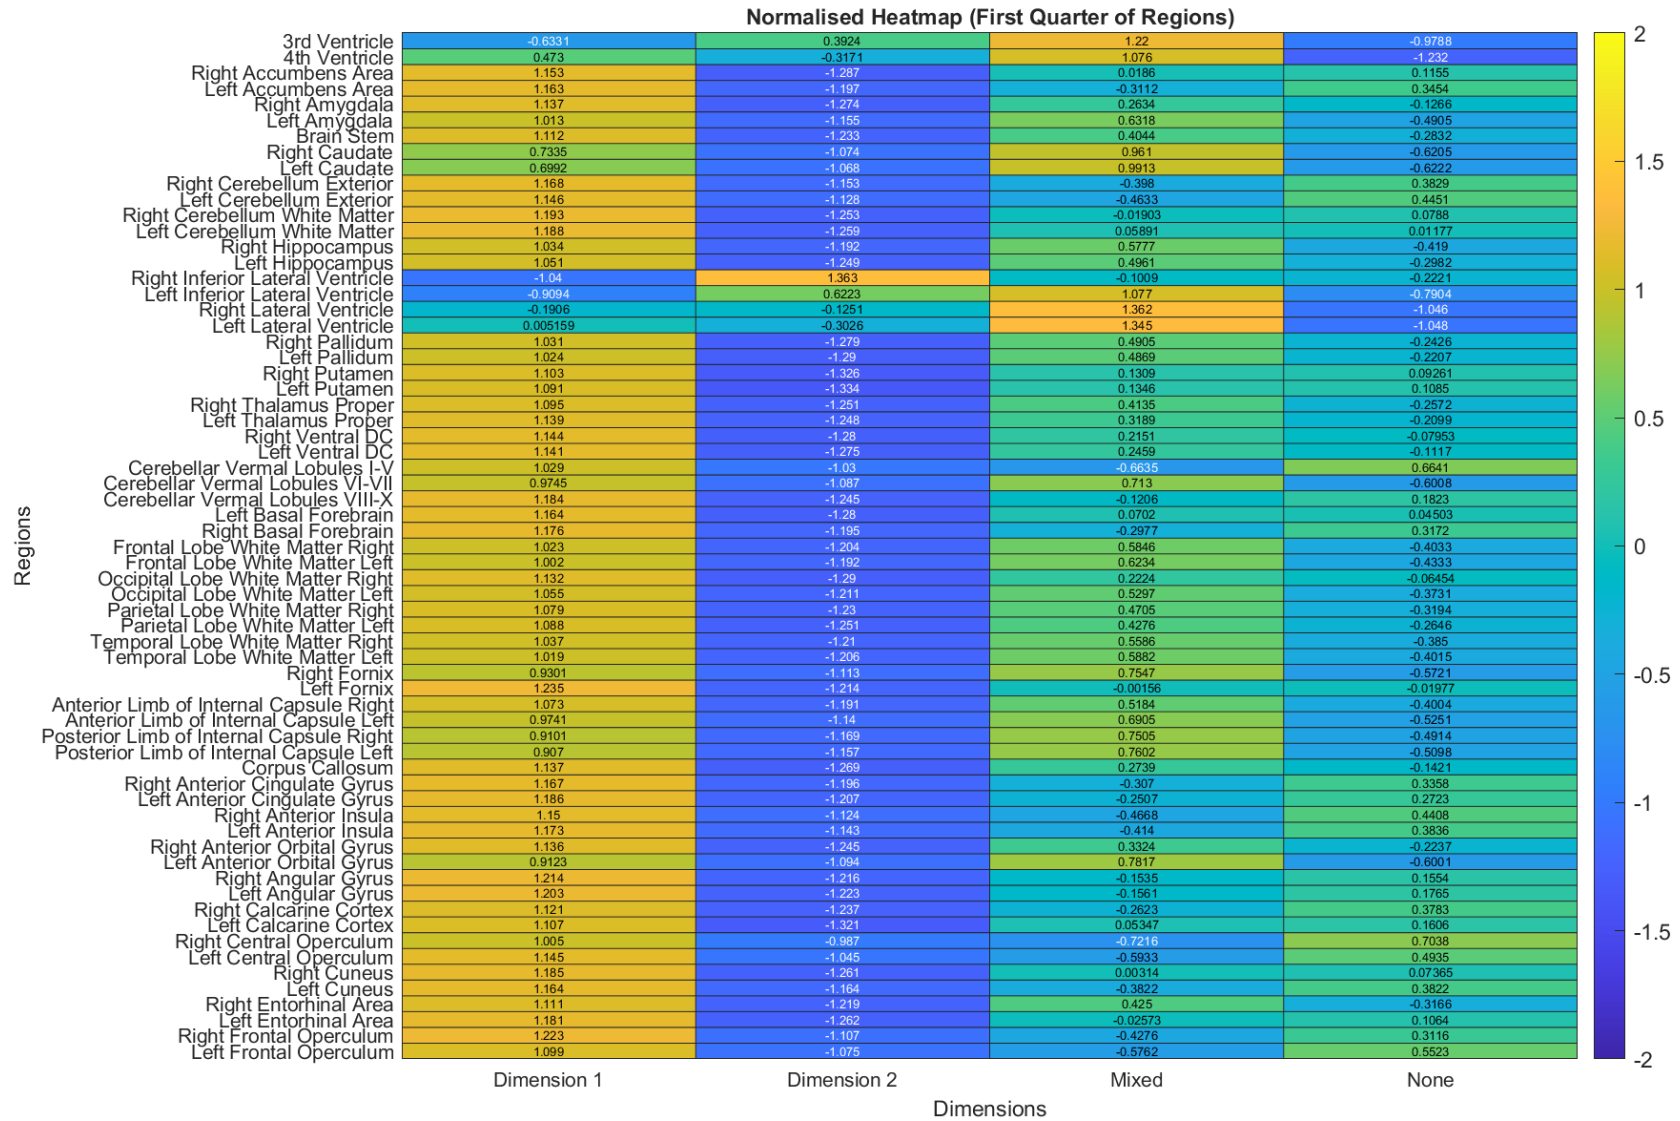

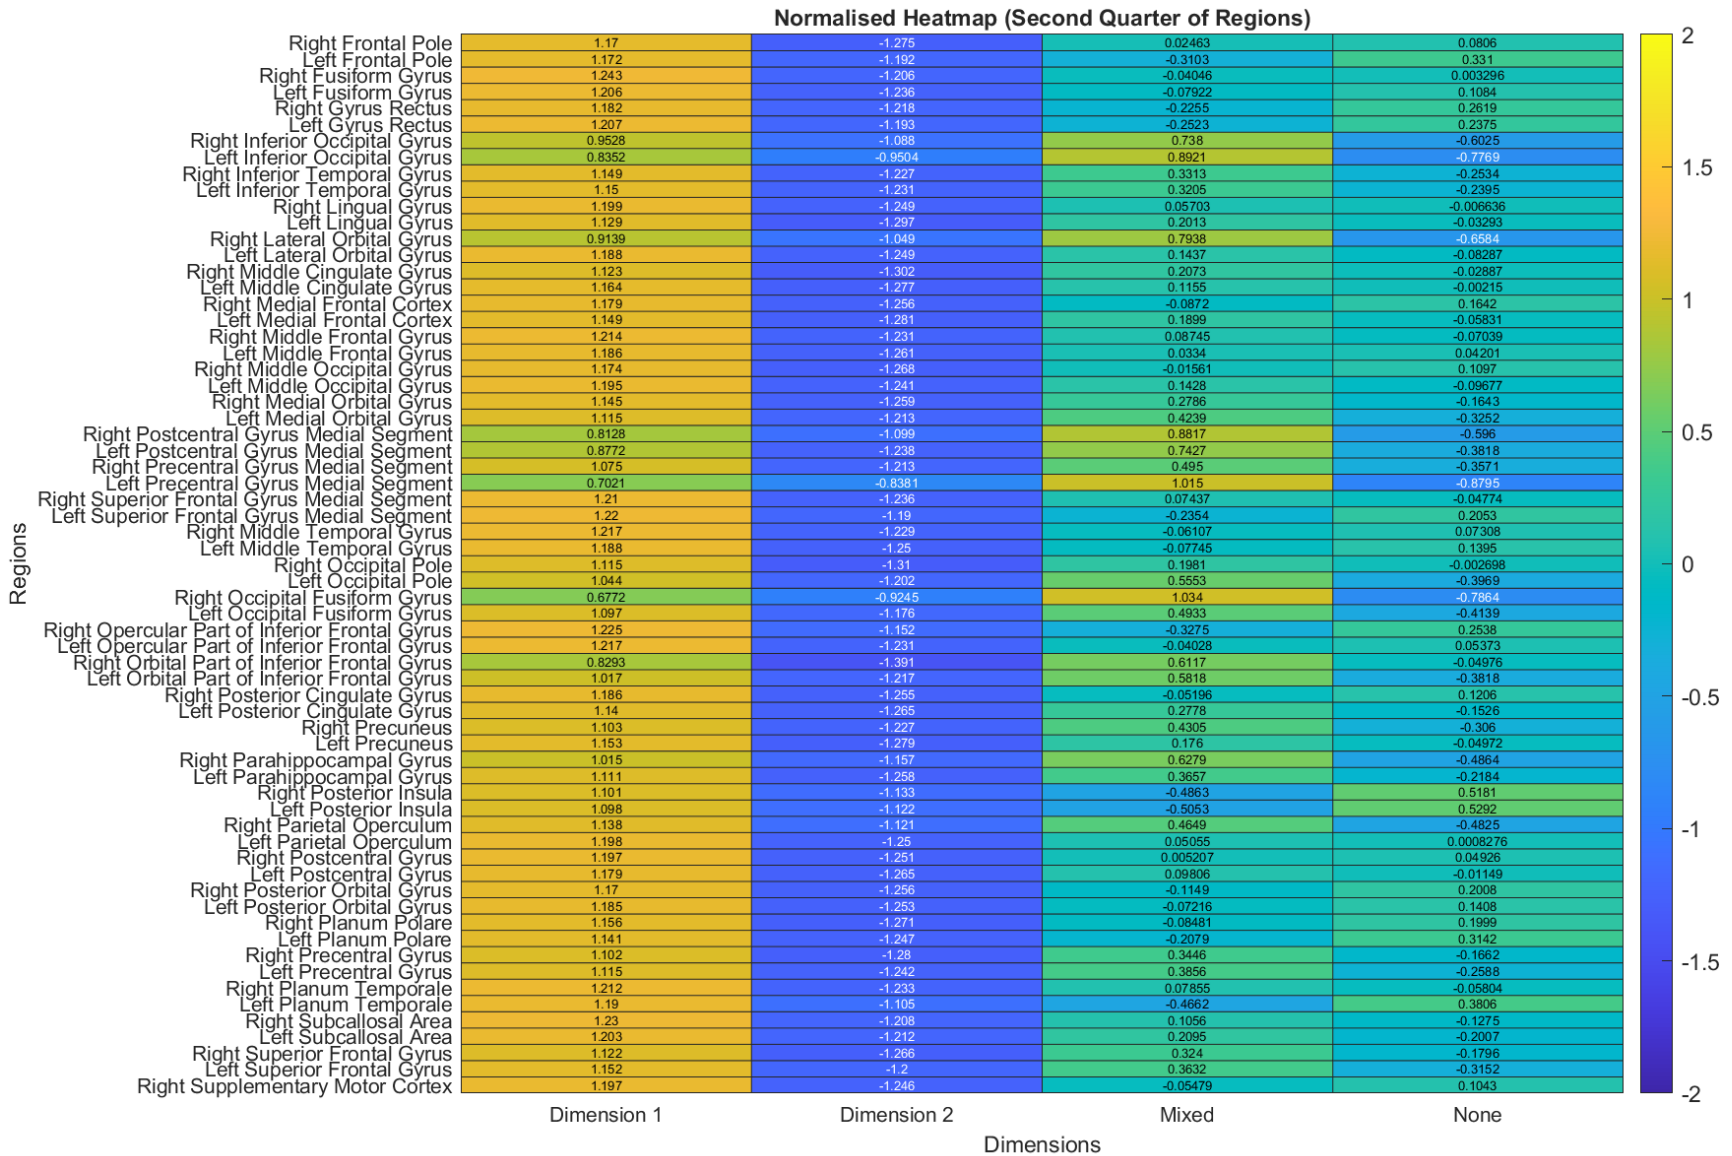

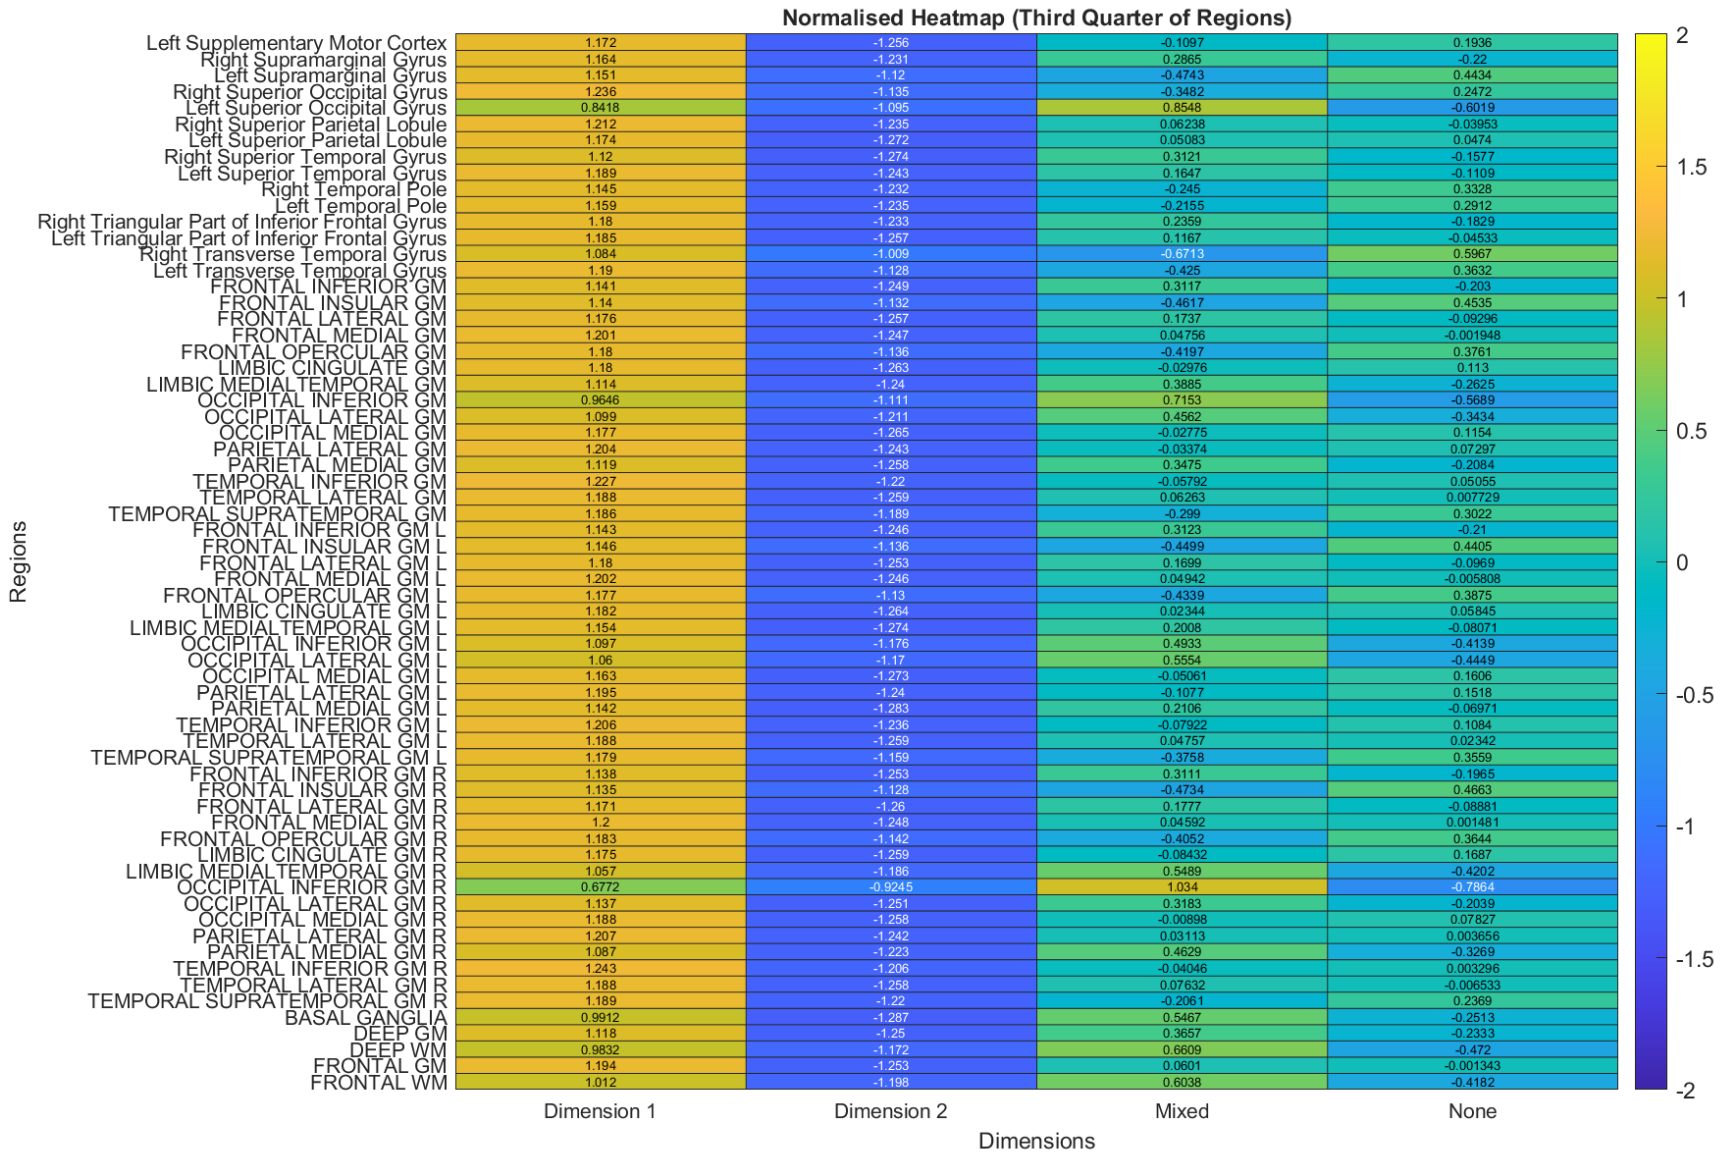

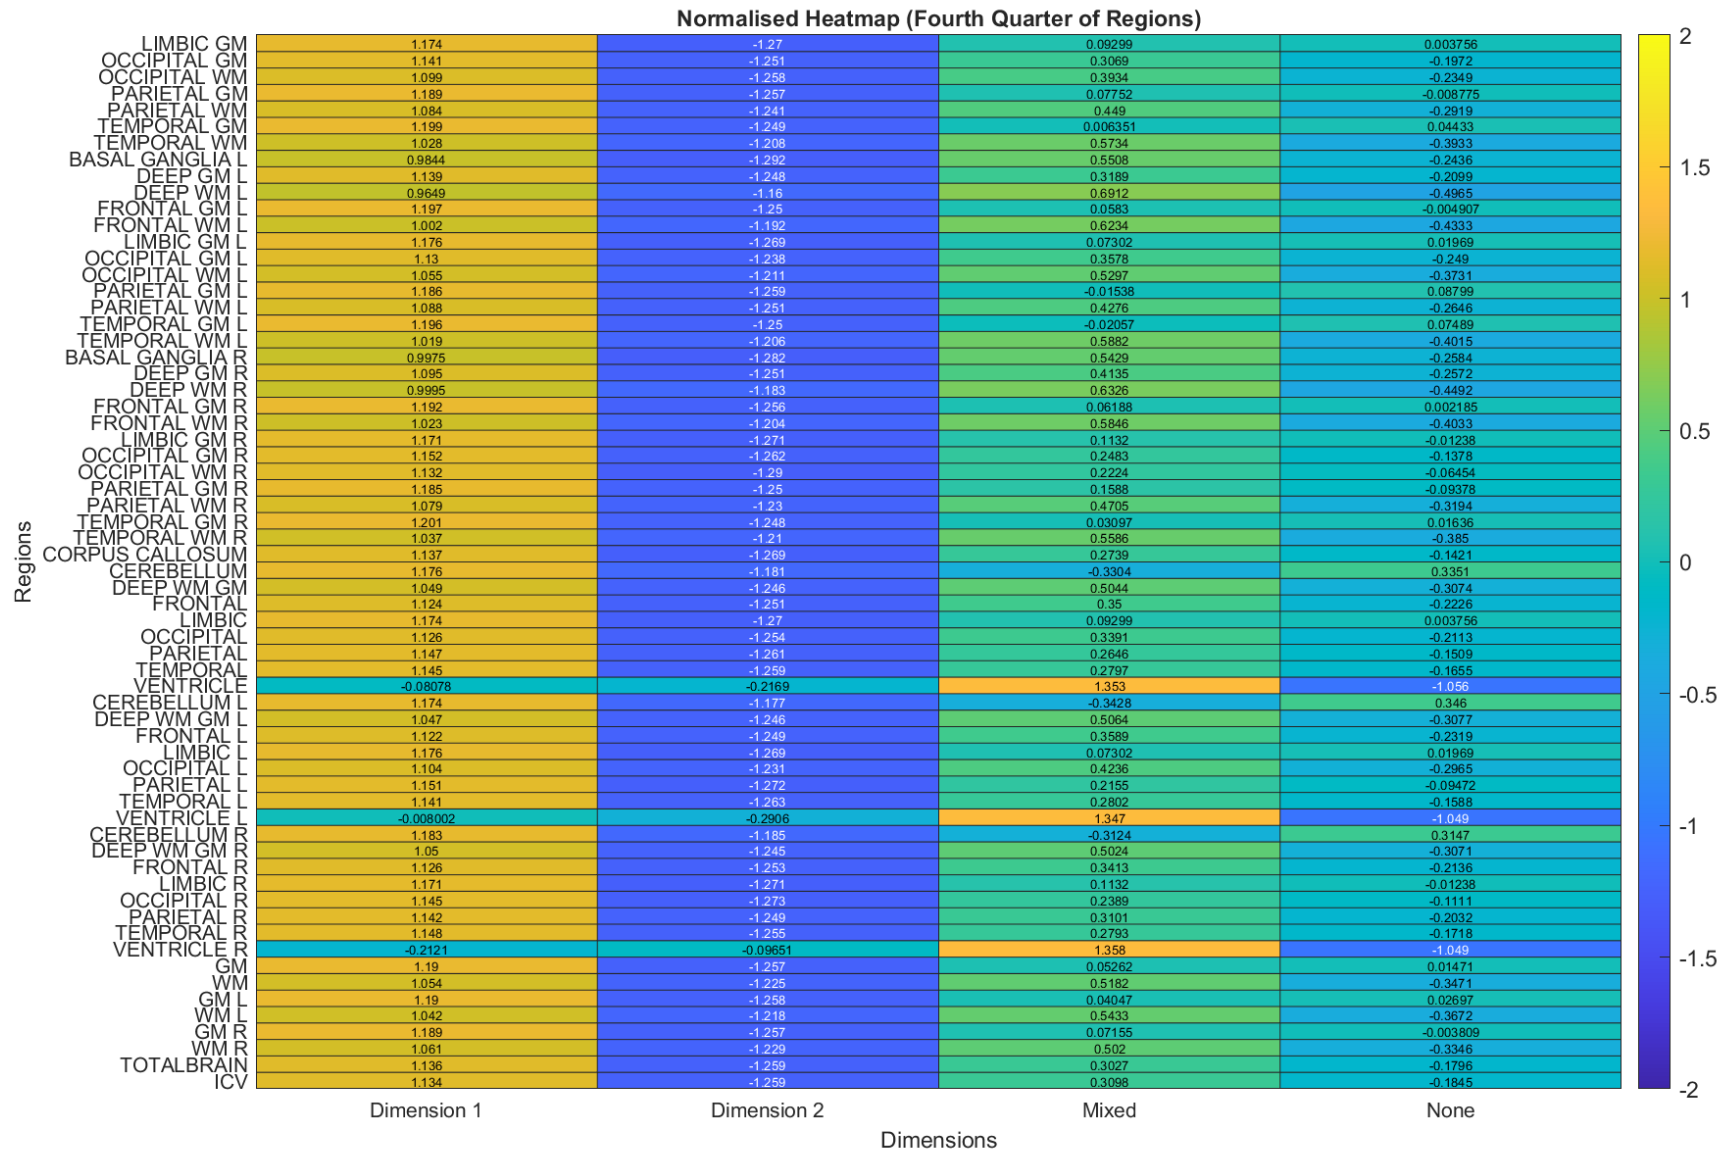

**Supplementary Figure 2. UK Biobank currently depressed subsample significant differences in Adverse Life Events and Self Harm variables between D1 and D2.**

Participants in the D2 group said “yes” to having attempted suicide and to having experienced adverse life events in significantly higher proportions than participants in the D1 group. Significance was determined using two-sided Chi-Square test. . \* =  $p < 0.05$ , \*\* =  $p < 0.005$ .

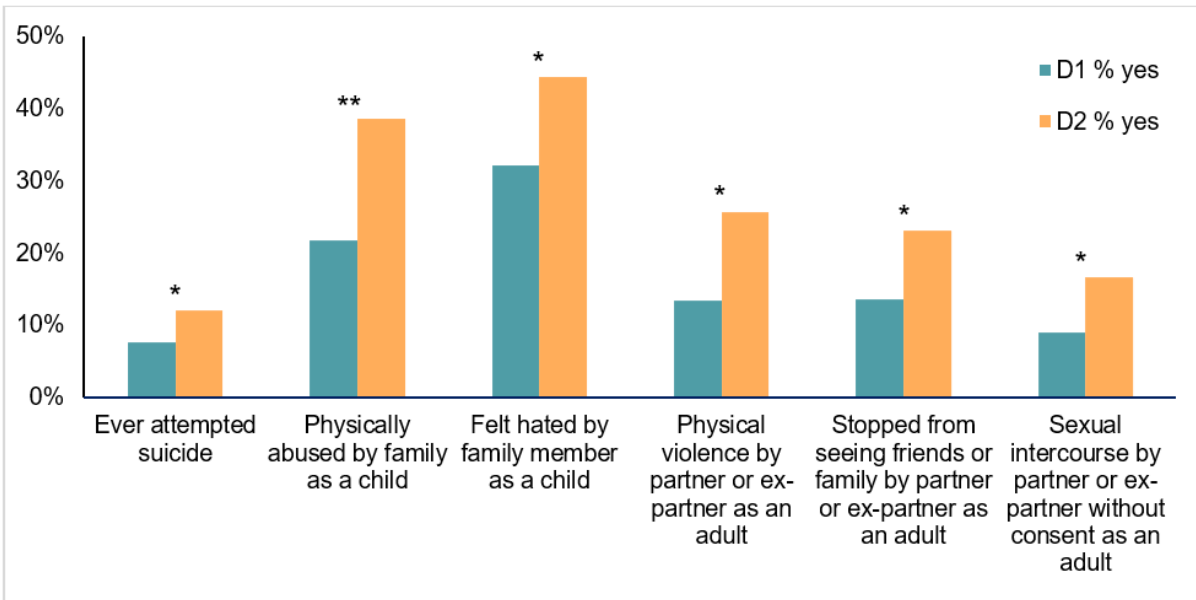



**Supplementary Figure 3. UK Biobank currently depressed subsample metabolomic comparisons between D1 and D2.** The x-axis represents the beta value with a negative value indicating that D1 has higher levels than D2 for the metabolite, and a positive beta value indicates that D2 has greater levels than D1. Significant results are presented in blue and non-significant differences are presented in grey.

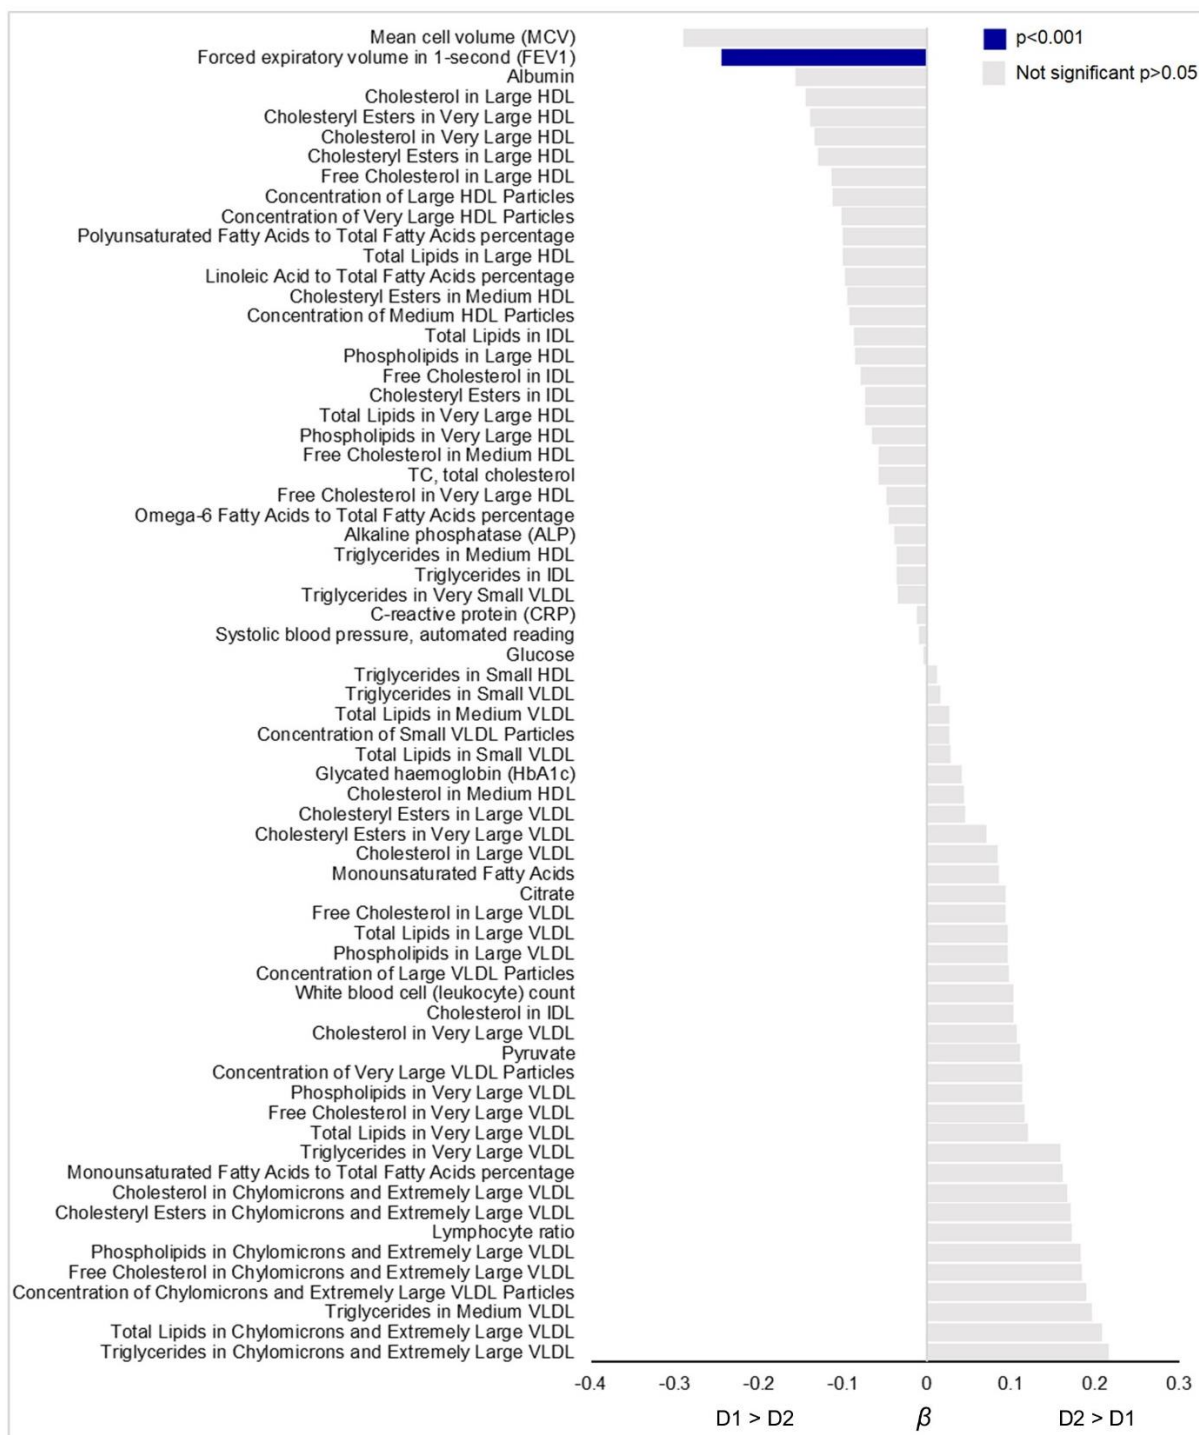

**Supplementary Figure 4. UK Biobank currently depressed subsample physical measures between D1 and D2.** The x-axis represents the beta value with a negative value indicating that D1 has higher levels than D2 for the physical measure, and a positive beta value indicates that D2 has greater levels than D1. Significant results are presented in blue and non-significant differences are presented in grey.

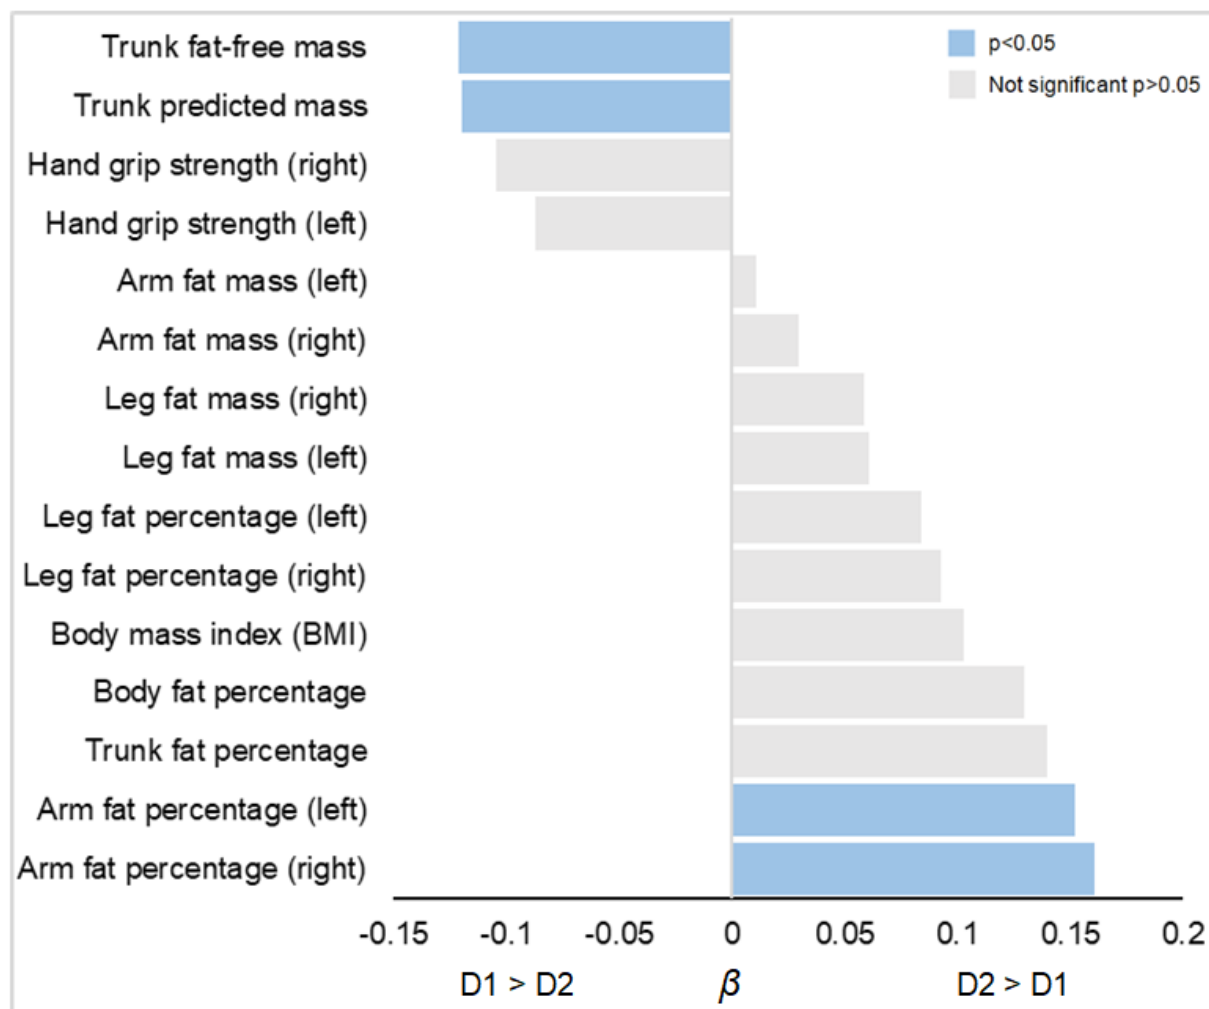

**Supplementary Table 11. RDoC Domains Distributions Across Dimension 1 and 2 Groups in COORD-MDD**

|                                         | Dimension 1       | Dimension 2       | P value |
|-----------------------------------------|-------------------|-------------------|---------|
| <b>Phenotypes</b>                       |                   |                   |         |
| Core Depression                         | 0.594 $\pm$ 0.165 | 0.556 $\pm$ 0.154 | 0.037*  |
| Anxiety                                 | 0.324 $\pm$ 0.171 | 0.355 $\pm$ 0.177 | 0.122   |
| Neurovegetative symptoms of melancholia | 0.276 $\pm$ 0.207 | 0.307 $\pm$ 0.203 | 0.155   |
| <b>RDoC domain</b>                      |                   |                   |         |
| Sensorimotor systems                    | 0.233 $\pm$ 0.241 | 0.315 $\pm$ 0.245 | 0.005*  |
| Negative Valance Systems                | 0.395 $\pm$ 0.111 | 0.423 $\pm$ 0.116 | 0.052   |
| Positive Valance Systems                | 0.601 $\pm$ 0.176 | 0.603 $\pm$ 0.174 | 0.937   |
| Arousal/Regulatory systems              | 0.257 $\pm$ 0.159 | 0.285 $\pm$ 0.272 | 0.142   |
| Cognitive systems                       | 0.485 $\pm$ 0.160 | 0.474 $\pm$ 0.191 | 0.611   |

Values are normalized total scores expressed as a mean percentage of the total possible score for all assessment items within each category with  $\pm$  standard deviation. RDoC, Research Domain Criteria. P-values calculated with ANOVA and corrected using FDR. \* =  $p < 0.05$ .

**Supplementary Table 12. Comparison of Phenotype Distributions Across Dimension 1 and 2 Groups in COORD-MDD**

| CD          | Dimension 1 | Dimension 2 | P value |
|-------------|-------------|-------------|---------|
| Phenotype + | 88 (45.3)   | 86 (37.1)   | 0.249   |
| Phenotype - | 106 (54.6)  | 146 (62.9)  |         |
| ANX         | Dimension 1 | Dimension 2 | P value |
| Phenotype + | 54 (27.8)   | 66 (28.5)   | 0.999   |
| Phenotype - | 140 (72.4)  | 166 (71.5)  |         |
| NVSM        | Dimension 1 | Dimension 2 | P value |
| Phenotype + | 59 (30.4)   | 68 (29.3)   | 0.889   |
| Phenotype - | 135 (69.6)  | 164 (70.7)  |         |

Values presented are number of participants with percentage in parenthesis. CD, core depression; ANX, anxiety; NVSM, neurovegetative symptoms of melancholia. P values calculated with Chi-square test and corrected using FDR.

**Supplementary Figure 5. Comparison of D1 and D2 total score on clinical assessment items used to measure RDoC domains (Citrome et al., 2022) and phenotypes (Amin et al., 2018). A)** Normalised total scores expressed as a mean percentage of the total possible score for all assessment items within each category with error bars representing standard error, shown for D1 and D2 for each RDoC domain, B) and for each phenotype. \*  $P < 0.05$ .

**A) Comparison of D1 and D2 on RDoC domain scores**

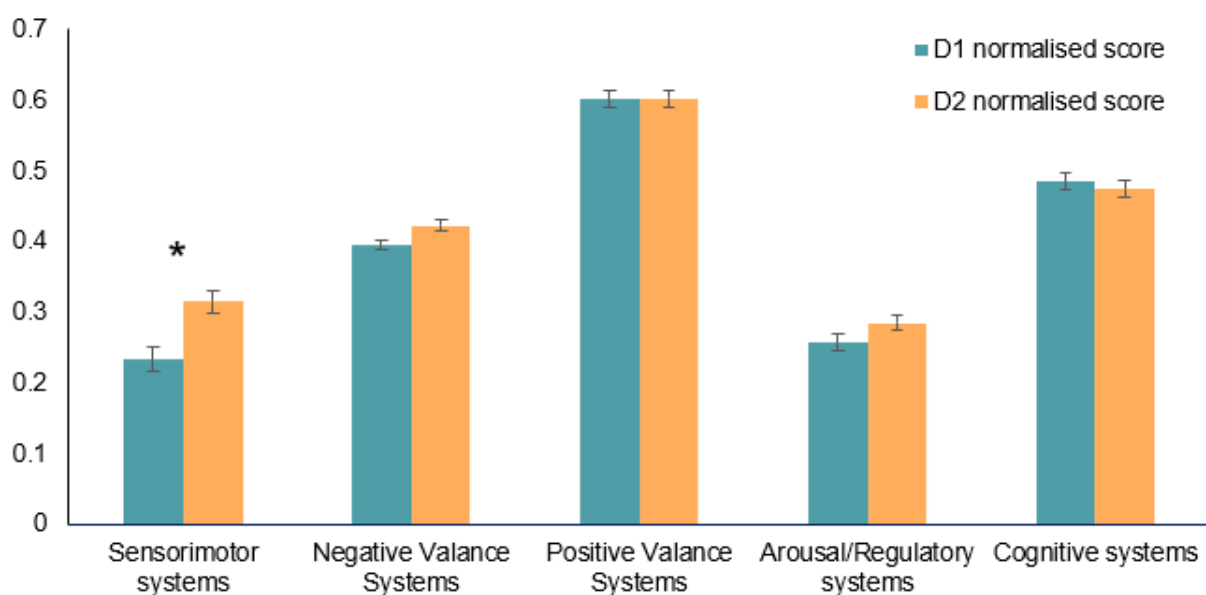

**B) Comparison of D1 and D2 on phenotype scores**

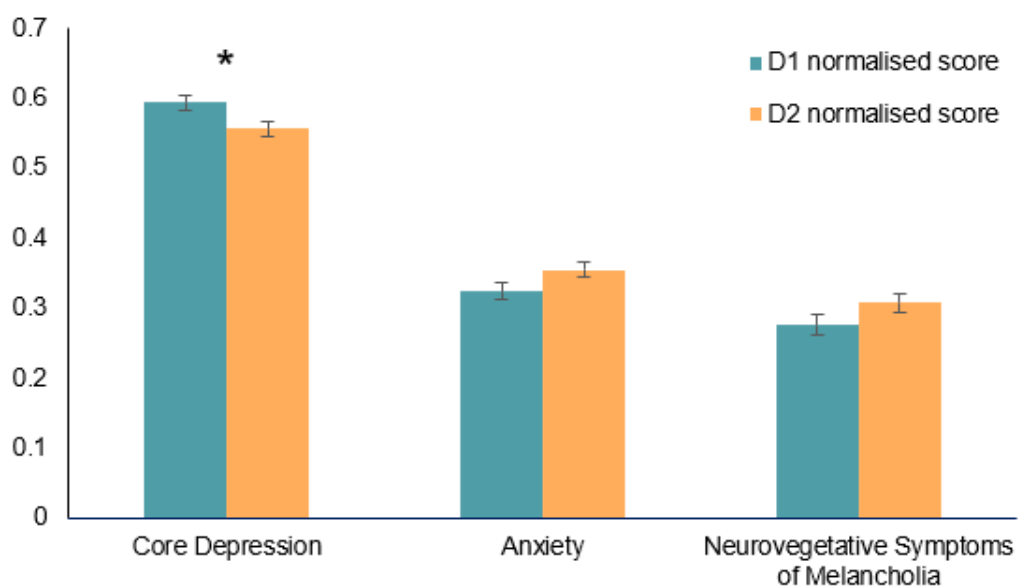

**Supplementary Figure 6. Overlap between phenotype positive participants (Core Depression (CD), Anxiety (ANX) and Neurovegetative Symptoms of Melancholia (NVSM)) in the COORD-MDD full sample, Dimension 1 and Dimension 2.** Circles represent each phenotype positive group, and the overlapping circles represent participants who were positive for more than one phenotype.

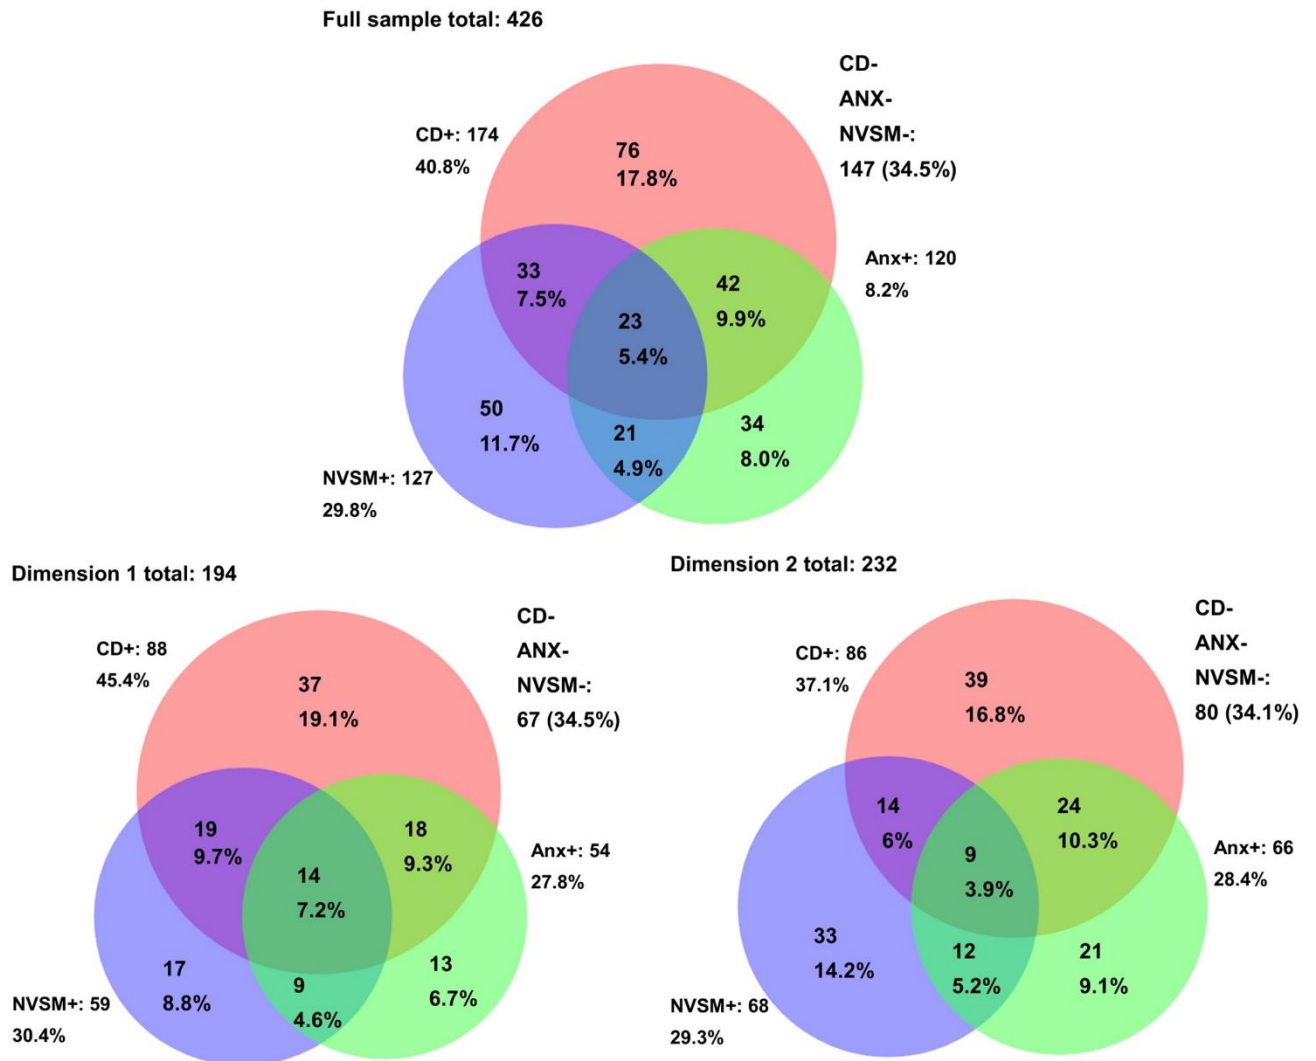

**Supplementary Table 13. Demographic information for UKB subsample of participants with bipolar disorder for total sample and classification groups**

|                         | Number     | Female% | Age          |
|-------------------------|------------|---------|--------------|
| <b>Bipolar disorder</b> |            |         |              |
| Total sample            | 92 (100%)  | 47.8    | 62.18 ± 7.07 |
| Dimension 1             | 13 (14.1%) | 30.8    | 62.76 ± 7.12 |
| Dimension 2             | 30 (32.6%) | 43.3    | 63.69 ± 6.56 |
| Combined D1 and D2      | 3 (3.3%)   | 33.3    | 70.33 ± 7.26 |
| Neither D1 nor D2       | 30 (32.6%) | 60.0    | 59.73 ± 6.90 |
| Margin                  | 16 (17.4%) | 50.0    | 61.96 ± 7.06 |

The mean age of participants is presented with  $\pm$  standard deviation. Percentages shown in parentheses indicate proportions relative to the total sample. Bipolar disorder participants are participants from general population sample with MRI data who have a diagnosis of bipolar disorder, UK Biobank Field ID: 20126 (bipolar and major depression status); response options, Bipolar I disorder and Bipolar II Disorder.

**Supplementary Table 14. Demographic information for UKB general population subgroups for sensitivity analysis.**

|                   | Number | Female% | Age              |
|-------------------|--------|---------|------------------|
| <b>Age 45-55</b>  |        |         |                  |
| Dimension 1       | 1172   | 49.6    | 52.88 $\pm$ 2.15 |
| Dimension 2       | 1940   | 59.4    | 52.56 $\pm$ 2.24 |
| <b>Ages 56-65</b> |        |         |                  |
| Dimension 1       | 2715   | 52.7    | 61.46 $\pm$ 2.87 |
| Dimension 2       | 3808   | 55.4    | 61.25 $\pm$ 2.84 |

Number of participants in the sample is presented. The mean age of participants is presented in years with  $\pm$  standard deviation.



## References

1. James, S. L. *et al.* Global, regional, and national incidence, prevalence, and years lived with disability for 354 diseases and injuries for 195 countries and territories, 1990–2017: a systematic analysis for the Global Burden of Disease Study 2017. *The Lancet* **392**, 1789–1858 (2018). [https://doi.org/10.1016/S0140-6736\(18\)32279-7](https://doi.org/10.1016/S0140-6736(18)32279-7)
2. American Psychiatric Association. *Diagnostic and Statistical Manual of Mental Disorders, (DSM-5®)*. (American Psychiatric Association, 2013).
3. Fu, C. H. Y., Fan, Y. & Davatzikos, C. Addressing heterogeneity (and homogeneity) in treatment mechanisms in depression and the potential to develop diagnostic and predictive biomarkers. *NeuroImage Clin.* **24**, 101997 (2019). <https://doi.org/10.1016/j.nicl.2019.101997>
4. Fu, C. H. Y. & Costafreda, S. G. Neuroimaging-based biomarkers in psychiatry: Clinical opportunities of a paradigm shift. *Can. J. Psychiatry* **58**, 499–508 (2013). <https://doi.org/10.1177/070674371305800904>
5. Fu, C. H. Y. *et al.* AI-based dimensional neuroimaging system for characterizing heterogeneity in brain structure and function in major depressive disorder: COORDINATE-MDD consortium design and rationale. *BMC Psychiatry* **23**, 59 (2023). <https://doi.org/10.1186/s12888-022-04509-7>
6. Costafreda, S. G., Chu, C., Ashburner, J. & Fu, C. H. Y. Prognostic and diagnostic potential of the structural neuroanatomy of depression. *PLoS ONE* **4**, e6353 (2009). <https://doi.org/10.1371/journal.pone.0006353>
7. Sankar, A. *et al.* Diagnostic potential of structural neuroimaging for depression from a multi-ethnic community sample. *BJPsych Open* **2**, 247–254 (2016). <https://doi.org/10.1192/bjpo.bp.115.002493>
8. Wen, J. *et al.* Characterizing heterogeneity in neuroimaging, cognition, clinical symptoms, and genetics among patients with late-life depression. *JAMA Psychiatry* **79**, 464–474 (2022). <https://doi.org/10.1001/jamapsychiatry.2022.0020>
9. Enneking, V., Leehr, E. J., Dannlowski, U. & Redlich, R. Brain structural effects of treatments for depression and biomarkers of response: a systematic review of neuroimaging studies. *Psychol. Med.* **50**, 187–209 (2020). <https://doi.org/10.1017/S0033291719003660>
10. Drysdale, A. T. *et al.* Resting-state connectivity biomarkers define neurophysiological subtypes of depression. *Nat. Med.* **23**, 28–38 (2017). <https://doi.org/10.1038/nm.4246>
11. Fu, C. H. Y. *et al.* Neuroanatomical dimensions in medication-free individuals with major depressive disorder and treatment response to SSRI antidepressant medications or placebo. *Nat. Ment. Health* **2**, 164–176 (2024). <https://doi.org/10.1038/s44220-023-00187-w>

12. Miller, K. L. *et al.* Multimodal population brain imaging in the UK Biobank prospective epidemiological study. *Nat. Neurosci.* **19**, 1523–1536 (2016).  
<https://doi.org/10.1038/nn.4393>
13. Alfaro-Almagro, F. *et al.* Image processing and Quality Control for the first 10,000 brain imaging datasets from UK Biobank. *NeuroImage* **166**, 400–424 (2018).  
<https://doi.org/10.1016/j.neuroimage.2017.10.034>
14. Qureshi, D. *et al.* Association of Metabolic Syndrome with Neuroimaging and Cognitive Outcomes in the UK Biobank. *Diabetes Care* **47**, 1415–1423 (2024).  
<https://doi.org/10.2337/dc24-0537>
15. Colombo, F. *et al.* Multimodal brain-derived subtypes of Major depressive disorder differentiate patients for anergic symptoms, immune-inflammatory markers, history of childhood trauma and treatment-resistance. *Eur. Neuropsychopharmacol.* **85**, 45–57 (2024). <https://doi.org/10.1016/j.euroneuro.2024.05.015>
16. Davis, K. A. S. *et al.* Mental health in UK Biobank - development, implementation and results from an online questionnaire completed by 157 366 participants: a reanalysis. *BJPsych Open* **6**, e18 (2020). <https://doi.org/10.1192/bjo.2019.100>
17. Howard, D. M. *et al.* Genetic stratification of depression in UK Biobank. *Transl. Psychiatry* **10**, 163 (2020). <https://doi.org/10.1038/s41398-020-0848-0>
18. Thorp, J. G. *et al.* Symptom-level modelling unravels the shared genetic architecture of anxiety and depression. *Nat. Hum. Behav.* **5**, 1432–1442 (2021).  
<https://doi.org/10.1038/s41562-021-01094-9>
19. Okbay, A. *et al.* Genome-wide association study identifies 74 loci associated with educational attainment. *Nature* **533**, 539–542 (2016).  
<https://doi.org/10.1038/nature17671>
20. Zhang, B. *et al.* Identifying behaviour-related and physiological risk factors for suicide attempts in the UK Biobank. *Nat. Hum. Behav.* **8**, 1784–1797 (2024).  
<https://doi.org/10.1038/s41562-024-01903-x>
21. Amin, N. *et al.* Interplay of Metabolome and Gut Microbiome in Individuals with Major Depressive Disorder vs Control Individuals. *JAMA Psychiatry* **80**, 597–609 (2023).  
<https://doi.org/10.1001/jamapsychiatry.2023.0685>
22. Sollis, E. *et al.* The NHGRI-EBI GWAS Catalog: knowledgebase and deposition resource. *Nucleic Acids Res.* **51**, D977–D985 (2023).  
<https://doi.org/10.1093/nar/gkac1010>
23. Nagel, M. *et al.* Meta-analysis of genome-wide association studies for neuroticism in 449,484 individuals identifies novel genetic loci and pathways. *Nat. Genet.* **50**, 920–927 (2018). <https://doi.org/10.1038/s41588-018-0151-7>
24. Trubetskoy, V. *et al.* Mapping genomic loci implicates genes and synaptic biology in schizophrenia. *Nature* **604**, 502–508 (2022). <https://doi.org/10.1038/s41586-022-04434-5>

25. Makowski, C. *et al.* Larger cerebral cortex is genetically correlated with greater frontal area and dorsal thickness. *Proc. Natl. Acad. Sci.* **120**, e2214834120 (2023). <https://doi.org/10.1073/pnas.2214834120>
26. Liu, N. *et al.* Cross-ancestry genome-wide association meta-analyses of hippocampal and subfield volumes. *Nat. Genet.* **55**, 1126–1137 (2023). <https://doi.org/10.1038/s41588-023-01425-8>
27. Martin, S. *et al.* Genetic Evidence for Different Adiposity Phenotypes and Their Opposing Influences on Ectopic Fat and Risk of Cardiometabolic Disease. *Diabetes* **70**, 1843–1856 (2021). <https://doi.org/10.2337/db21-0129>
28. Teder-Laving, M. *et al.* Genome-wide meta-analysis identifies novel loci conferring risk of acne vulgaris. *Eur. J. Hum. Genet.* **32**, 1136–1143 (2024). <https://doi.org/10.1038/s41431-023-01326-8>
29. Kim, J., Lee, J., Nam, K. & Lee, S. Investigation of genetic variants and causal biomarkers associated with brain aging. *Sci. Rep.* **13**, 1526 (2023). <https://doi.org/10.1038/s41598-023-27903-x>
30. van der Meer, D. *et al.* The genetic architecture of human cortical folding. *Sci. Adv.* **7**, eabj9446 (2021). <https://doi.org/10.1126/sciadv.abj9446>
31. Harris, B. H. L. *et al.* New role of fat-free mass in cancer risk linked with genetic predisposition. *Sci. Rep.* **14**, 7270 (2024). <https://doi.org/10.1038/s41598-024-54291-7>
32. Melin, B. S. *et al.* Genome-wide association study of glioma subtypes identifies specific differences in genetic susceptibility to glioblastoma and non-glioblastoma tumors. *Nat. Genet.* **49**, 789–794 (2017). <https://doi.org/10.1038/ng.3823>
33. Wang, H. *et al.* Genome-wide interaction analysis of pathological hallmarks in Alzheimer's disease. *Neurobiol. Aging* **93**, 61–68 (2020). <https://doi.org/10.1016/j.neurobiolaging.2020.04.025>
34. Zhao, B. *et al.* Large-scale GWAS reveals genetic architecture of brain white matter microstructure and genetic overlap with cognitive and mental health traits (n = 17,706). *Mol. Psychiatry* **26**, 3943–3955 (2021). <https://doi.org/10.1038/s41380-019-0569-z>
35. Cox, S. R., Ritchie, S. J., Fawns-Ritchie, C., Tucker-Drob, E. M. & Deary, I. J. Structural brain imaging correlates of general intelligence in UK Biobank. *Intelligence* **76**, 101376 (2019). <https://doi.org/10.1016/j.intell.2019.101376>
36. Lammer, L. *et al.* Impact of social isolation on grey matter structure and cognitive functions: A population-based longitudinal neuroimaging study. *eLife* **12**, e83660 (2023). <https://doi.org/10.7554/eLife.83660>
37. Liu, R. T., Kraines, M. A., Massing-Schaffer, M. & Alloy, L. B. Rejection Sensitivity and Depression: Mediation by Stress Generation. *Psychiatry* **77**, 86–97 (2014). <https://doi.org/10.1521/psyc.2014.77.1.86>

38. Vekic, J., Stefanovic, A. & Zeljkovic, A. Obesity and Dyslipidemia: A Review of Current Evidence. *Curr. Obes. Rep.* **12**, 207–222 (2023). <https://doi.org/10.1007/s13679-023-00518-z>
39. Chourpiliadis, C. *et al.* Metabolic Profile and Long-Term Risk of Depression, Anxiety, and Stress-Related Disorders. *JAMA Netw. Open* **7**, e244525 (2024). <https://doi.org/10.1001/jamanetworkopen.2024.4525>
40. Lv, X. *et al.* Body composition, lifestyle, and depression: a prospective study in the UK biobank. *BMC Public Health* **24**, 393 (2024). <https://doi.org/10.1186/s12889-024-17891-6>
41. Mujica-Parodi, L. R., Renelique, R. & Taylor, M. K. Higher body fat percentage is associated with increased cortisol reactivity and impaired cognitive resilience in response to acute emotional stress. *Int. J. Obes.* **33**, 157–165 (2009). <https://doi.org/10.1038/ijo.2008.218>
42. Cole, J. H. *et al.* Body mass index, but not FTO genotype or major depressive disorder, influences brain structure. *Neuroscience* **252**, 109–117 (2013). <https://doi.org/10.1016/j.neuroscience.2013.07.015>
43. Hidese, S. *et al.* Association of body mass index and its classifications with gray matter volume in individuals with a wide range of body mass index group: A whole-brain magnetic resonance imaging study. *Front. Hum. Neurosci.* **16**, (2022). <https://doi.org/10.3389/fnhum.2022.926804>
44. Lamers, F. *et al.* Depression profilers and immuno-metabolic dysregulation: Longitudinal results from the NESDA study. *Brain. Behav. Immun.* **88**, 174–183 (2020). <https://doi.org/10.1016/j.bbi.2020.04.002>
45. Brydges, C. R. *et al.* Metabolomic and inflammatory signatures of symptom dimensions in major depression. *Brain. Behav. Immun.* **102**, 42–52 (2022). <https://doi.org/10.1016/j.bbi.2022.02.003>
46. Huang, J. *et al.* Genomics and phenomics of body mass index reveals a complex disease network. *Nat. Commun.* **13**, 7973 (2022). <https://doi.org/10.1038/s41467-022-35553-2>
47. Hamer, M. & Batty, G. D. Association of body mass index and waist-to-hip ratio with brain structure. *Neurology* **92**, e594–e600 (2019). <https://doi.org/10.1212/WNL.0000000000006879>
48. Pflanz, C.-P. *et al.* Central obesity is selectively associated with cerebral gray matter atrophy in 15,634 subjects in the UK Biobank. *Int. J. Obes.* **46**, 1059–1067 (2022). <https://doi.org/10.1038/s41366-021-00992-2>
49. Gautam, P., Anstey, K. J., Wen, W., Sachdev, P. S. & Cherbuin, N. Cortical gyrification and its relationships with cortical volume, cortical thickness, and cognitive performance in healthy mid-life adults. *Behav. Brain Res.* **287**, 331–339 (2015). <https://doi.org/10.1016/j.bbr.2015.03.018>

50. Penttilä, J. *et al.* Cortical folding in patients with bipolar disorder or unipolar depression. *J. Psychiatry Neurosci. JPN* **34**, 127–135 (2009).
51. Garel, C. *et al.* Fetal cerebral cortex: normal gestational landmarks identified using prenatal MR imaging. *AJNR Am. J. Neuroradiol.* **22**, 184–189 (2001).
52. Dubois, J. *et al.* Primary cortical folding in the human newborn: an early marker of later functional development. *Brain* **131**, 2028–2041 (2008).  
<https://doi.org/10.1093/brain/awn137>
53. Hedman, A. M., van Haren, N. E. M., Schnack, H. G., Kahn, R. S. & Hulshoff Pol, H. E. Human brain changes across the life span: a review of 56 longitudinal magnetic resonance imaging studies. *Hum. Brain Mapp.* **33**, 1987–2002 (2012).
54. Yang, W. *et al.* The effects of childhood maltreatment on cortical thickness and gray matter volume: a coordinate-based meta-analysis. *Psychol. Med.* **53**, 1681–1699 (2023). <https://doi.org/10.1017/S0033291723000661>
55. Ireton, R., Hughes, A. & Klabunde, M. A Functional Magnetic Resonance Imaging Meta-Analysis of Childhood Trauma. *Biol. Psychiatry Cogn. Neurosci. Neuroimaging* **9**, 561–570 (2024). <https://doi.org/10.1016/j.bpsc.2024.01.009>
56. Lim, L., Howells, H., Radua, J. & Rubia, K. Aberrant structural connectivity in childhood maltreatment: A meta-analysis. *Neurosci. Biobehav. Rev.* **116**, 406–414 (2020).  
<https://doi.org/10.1016/j.neubiorev.2020.07.004>
57. Green, J. G. *et al.* Childhood Adversities and Adult Psychiatric Disorders in the National Comorbidity Survey Replication I: Associations With First Onset of DSM-IV Disorders. *Arch. Gen. Psychiatry* **67**, 113–123 (2010).  
<https://doi.org/10.1001/archgenpsychiatry.2009.186>
58. Ringwald, K. G. *et al.* Interaction of recent stressful life events and childhood abuse on orbitofrontal grey matter volume in adults with depression. *J. Affect. Disord.* **312**, 122–127 (2022). <https://doi.org/10.1016/j.jad.2022.06.050>
59. Keyes, K. M. & Westreich, D. UK Biobank, big data, and the consequences of non-representativeness. *The Lancet* **393**, 1297 (2019). [https://doi.org/10.1016/S0140-6736\(18\)33067-8](https://doi.org/10.1016/S0140-6736(18)33067-8)
60. Sudlow, C. *et al.* UK Biobank: An Open Access Resource for Identifying the Causes of a Wide Range of Complex Diseases of Middle and Old Age. *PLOS Med.* **12**, e1001779 (2015). <https://doi.org/10.1371/journal.pmed.1001779>
61. Doshi, J. *et al.* MUSE: Multi-atlas region Segmentation utilizing Ensembles of registration algorithms and parameters, and locally optimal atlas selection. *NeuroImage* **127**, 186–195 (2016). <https://doi.org/10.1016/j.neuroimage.2015.11.073>
62. Varol, E., Sotiras, A. & Davatzikos, C. HYDRA: Revealing heterogeneity of imaging and genetic patterns through a multiple max-margin discriminative analysis framework. *NeuroImage* **145**, 346–364 (2017). <https://doi.org/10.1016/j.neuroimage.2016.02.041>

63. Fortin, J.-P. *et al.* Harmonization of cortical thickness measurements across scanners and sites. *NeuroImage* **167**, 104–120 (2018).  
<https://doi.org/10.1016/j.neuroimage.2017.11.024>
64. Davatzikos, C., Genc, A., Xu, D. & Resnick, S. M. Voxel-based morphometry using the RAVENS maps: methods and validation using simulated longitudinal atrophy. *NeuroImage* **14**, 1361–1369 (2001). <https://doi.org/10.1006/nimg.2001.0937>
65. Srinivasan, D. *et al.* A comparison of Freesurfer and multi-atlas MUSE for brain anatomy segmentation: Findings about size and age bias, and inter-scanner stability in multi-site aging studies. *NeuroImage* **223**, 117248 (2020).  
<https://doi.org/10.1016/j.neuroimage.2020.117248>
66. Fawns-Ritchie, C. & Deary, I. J. Reliability and validity of the UK Biobank cognitive tests. *PLoS ONE* **15**, e0231627 (2020). <https://doi.org/10.1371/journal.pone.0231627>
67. Kroenke, K., Spitzer, R. & Williams, W. The PHQ-9: Validity of a brief depression severity measure. *J. Gen. Intern. Med.* **16**, 606–616 (2001).
68. Spitzer, R. L., Kroenke, K., Williams, J. B. W. & Löwe, B. A brief measure for assessing generalized anxiety disorder: the GAD-7. *Arch. Intern. Med.* **166**, 1092–1097 (2006).
69. Eysenck, H. J. & Eysenck, S. B. G. *Manual of the Eysenck Personality Questionnaire (Junior and Adult)*. (Hodder and Stoughton Educational, 1975).
70. Mao, R. *et al.* Association of biological age acceleration with cardiac morphology, function, and incident heart failure: insights from UK Biobank participants. *Eur. Heart J. - Cardiovasc. Imaging* **25**, 1315–1323 (2024). <https://doi.org/10.1093/ehjci/jeae126>
71. Bycroft, C. *et al.* The UK Biobank resource with deep phenotyping and genomic data. *Nature* **562**, 203–209 (2018). <https://doi.org/10.1038/s41586-018-0579-z>
72. Manichaikul, A. *et al.* Robust relationship inference in genome-wide association studies. *Bioinformatics* **26**, 2867–2873 (2010). <https://doi.org/10.1093/bioinformatics/btq559>
73. Purcell, S. *et al.* PLINK: A Tool Set for Whole-Genome Association and Population-Based Linkage Analyses. *Am. J. Hum. Genet.* **81**, 559–575 (2007).
74. Insel, T. *et al.* Research Domain Criteria (RDoC): Toward a new classification framework for research on mental disorders. *Am. J. Psychiatry* **167**, 748–751 (2010).  
<https://doi.org/10.1176/appi.ajp.2010.09091379>
75. Citrome, L. *et al.* Making sense of the matrix: A qualitative assessment and commentary on connecting psychiatric symptom scale items to the Research Domain Criteria (RDoC). *Innov. Clin. Neurosci.* **19**, 26–32 (2022).
76. Ahmed, A. T. *et al.* Mapping depression rating scale phenotypes onto research domain criteria (RDoC) to inform biological research in mood disorders. *J. Affect. Disord.* **238**, 1–7 (2018). <https://doi.org/10.1016/j.jad.2018.05.005>
